# Supplementary material
Source: publisher figshare collection journal article supplement (https://acs.figshare.com/ndownloader/files/4578814)

# Synthesis of Chromans via [3+3] Cyclocoupling of Phenols with Allylic Alcohols Using a Mo/*o*-Chloranil Catalyst System

*Yoshihiko Yamamoto\* and Kouhei Itonaga*

Department of Applied Chemistry, Graduate School of Science and Engineering, Tokyo Institute of Technology, Ookayama, Meguro-ku, Tokyo 152-8552, Japan

## Supporting Information

### Contents

|                                                               |     |
|---------------------------------------------------------------|-----|
| I. General Considerations                                     | S2  |
| II. Synthesis of Chromans                                     | S2  |
| III. References                                               | S9  |
| IV. NMR Charts                                                | S10 |
| V. Temperature-Time Profile for Microwave-Heating Experiments | S59 |

## I. General Considerations

Column chromatography was performed on silica gel with mixed solvents.  $^1\text{H}$  and  $^{13}\text{C}$  NMR spectra were obtained for samples in  $\text{CDCl}_3$  solutions at 25 °C.  $^1\text{H}$  NMR chemical shifts are reported in terms of chemical shift ( $\delta$ , ppm) relative to the singlet at 7.26 ppm for chloroform. Splitting patterns are designated as follows: s, singlet; d, doublet; t, triplet; q, quartet; quint, quintet; sext, sextet; sept, septet; m, multiplet. Coupling constants are reported in Hz.  $^{13}\text{C}$  NMR spectra were fully decoupled and are reported in terms of chemical shift ( $\delta$ , ppm) relative to the triplet at 77.0 ppm for  $\text{CDCl}_3$ . EI mass measurements were performed with a Shimadzu GCMS-QP2010 plus mass spectrometer. Elemental analyses were performed at Center for Advanced Materials Analysis of Tokyo Institute of Technology. Melting points were obtained in capillary tubes and are uncorrected.  $\text{CpMoCl}(\text{CO})_3$ ,  $[\text{CpMo}(\text{CO})_3]_2$ ,  $[\text{Mo}(\text{OAc})_2]_2$ , *o*-chloranil, chlorobenzene, and isoprene were purchased and used as received. Most of allylic alcohols were purchased and used as received except for **2c–d**, and **2f** which were prepared by reductions of the parent esters **a** or a ketone. Microwave irradiation experiments were carried out with a single-mode microwave reactor (CEM Discover LabMate). Closed reaction vessels were used, and the temperature was monitored by an on-line IR detector.

## II. Synthesis of Chromans.

**Representative Procedures for Cyclocoupling (1) – Synthesis of 3aa:** In a 6-mL reaction tube,  $\text{CpMoCl}(\text{CO})_3$  (14.02 mg, 0.050 mmol) and *o*-chloranil (24.57 mg, 0.10 mmol) were mixed with *p*-cresol (3 mL) at room temperature under Ar atmosphere. After stirring for 30 min at room temperature, to this mixture prenyl alcohol (102  $\mu\text{L}$ , 1.00 mmol) was added by a syringe. Then, the reaction tube was sealed with a teflon cap and heated in a microwave reactor at 150 °C for 1 h (Temperature-Time Profile 1). After cooling to room temperature, the solution was diluted with ether (5 mL), and was filtered through a pad of alumina. The insoluble materials were further washed with ether (40 mL). The filtrate was washed with 1 N NaOH (40 mL) and extracted with ether (20 mL  $\times$  2). The combined organic layer was dried over  $\text{MgSO}_4$ , and then concentrated in vacuo. The residue was purified by silica gel flash column chromatography (Kanto 60N, spherical, 63–210  $\mu\text{m}$ ; eluent hexane–AcOEt 100:1) to give chroman **3aa** (147.64 mg, 84%) as a colorless oil. The following spectral data were in good agreement with those reported previously;<sup>1</sup>  $^1\text{H}$  NMR (300 MHz,  $\text{CDCl}_3$ ):  $\delta$  1.32 (s, 6 H), 1.79 (t,  $J$  = 6.9 Hz, 2 H), 2.25 (s, 3 H), 2.74 (t,  $J$  = 6.9 Hz, 2 H), 6.68 (d,  $J$  = 7.8 Hz, 1 H), 6.87 (s, 1 H), 6.89 (d,  $J$  = 7.8 Hz, 1 H);  $^{13}\text{C}$  NMR (75 MHz,  $\text{CDCl}_3$ ):  $\delta$

20.4, 22.4, 26.8, 32.9, 73.8, 116.9, 120.5, 127.9, 128.6, 129.7, 151.7.

**Analytical data for 3ba:**<sup>2</sup> colorless oil (Kanto 60N, spherical, 63–210  $\mu\text{m}$ ; eluent hexane–AcOEt 50:1);  $^1\text{H}$  NMR (300 MHz,  $\text{CDCl}_3$ ):  $\delta$  1.32 (s, 6 H), 1.78 (t,  $J = 6.9$  Hz, 2 H), 2.74 (t,  $J = 6.9$  Hz, 2 H), 6.70 (d,  $J = 9.6$  Hz, 1 H), 7.03 (d,  $J = 9.6$  Hz, 1 H), 7.04 (s, 1 H);  $^{13}\text{C}$  NMR (75 MHz,  $\text{CDCl}_3$ ):  $\delta$  22.3, 26.7, 32.4, 74.4, 118.5, 122.4, 124.2, 127.1, 128.9, 152.6.

**Analytical data for 3da:**<sup>3</sup> colorless oil (Kanto 60N, spherical, 63–210  $\mu\text{m}$ ; eluent hexane–AcOEt 100:1);  $^1\text{H}$  NMR (300 MHz,  $\text{CDCl}_3$ ):  $\delta$  1.31 (s, 6 H), 1.77 (t,  $J = 6.9$  Hz, 2 H), 2.14 (s, 3 H), 2.22 (s, 3 H), 2.73 (t,  $J = 6.9$  Hz, 2 H), 6.72 (s, 1 H), 6.78 (s, 1 H);  $^{13}\text{C}$  NMR (75 MHz,  $\text{CDCl}_3$ ):  $\delta$  15.9, 20.4, 22.6, 27.0, 33.0, 73.6, 119.9, 125.9, 127.1, 127.8, 129.1, 149.9.

**Analytical data for 3ab (all-rac):** colorless oil (Kanto 60N, spherical, 63–210  $\mu\text{m}$ ; eluent hexane–AcOEt 300:1);  $^1\text{H}$  NMR (300 MHz,  $\text{CDCl}_3$ ):  $\delta$  0.82–0.88 (m, 12 H), 1.00–1.61 (m, 21 H), 1.27 (s, 3 H), 1.74 (dt,  $J = 13.5, 6.6$  Hz, 1 H), 1.83 (dt,  $J = 13.5, 6.6$  Hz, 1 H), 2.24 (s, 3 H), 2.71 (t,  $J = 6.6$  Hz, 2 H), 6.68 (d,  $J = 8.1$  Hz, 1 H), 6.86 (s, 1 H), 6.88 (d,  $J = 8.1$  Hz, 1 H);  $^{13}\text{C}$  NMR (75 MHz,  $\text{CDCl}_3$ ):  $\delta$  19.6–19.7 (3 peak tops,  $\text{CH}_3$ ), 20.4 ( $\text{CH}_3$ ), 21.1 ( $\text{CH}_2$ ), 22.2 ( $\text{CH}_2$ ), 22.6 ( $\text{CH}_3$ ), 22.7 ( $\text{CH}_3$ ), 24.2 ( $\text{CH}_3$ ), 24.5 ( $\text{CH}_2$ ), 24.8 ( $\text{CH}_2$ ), 28.0 (CH), 31.0 (2 peak tops,  $\text{CH}_2$ ), 32.7–32.8 (4 peak tops, CH), 37.3–37.6 (5 peak tops,  $\text{CH}_2$ ), 39.4 ( $\text{CH}_2$ ), 40.0 (2 peak tops,  $\text{CH}_2$ ), 76.0, 117.0 (CH), 120.8, 127.9 (CH), 128.5, 129.7 (CH), 151.8; MS (EI):  $m/z$  (%): 386 (41)  $[\text{M}]^+$ , 161 (89)  $[\text{M} - (\text{CH}_2)_3\text{CH}(\text{CH}_3)(\text{CH}_2)_3\text{CH}(\text{CH}_3)(\text{CH}_2)_3\text{CH}(\text{CH}_3)_2]^+$ , 121 (100)  $[\text{MH} - \text{CH}_2=\text{CH}(\text{CH}_3)(\text{CH}_2)_3\text{CH}(\text{CH}_3)(\text{CH}_2)_3\text{CH}(\text{CH}_3)(\text{CH}_2)_3\text{CH}(\text{CH}_3)_2]^+$ ; EA calcd (%) for  $\text{C}_{27}\text{H}_{46}\text{O}$  (386.65): C 83.87, H 11.99; found: C 83.87, H 11.17.

**Analytical data for 3ac:**<sup>4</sup> colorless oil (Kanto 60, spherical, 40–50  $\mu\text{m}$ ; eluent hexane);  $^1\text{H}$  NMR (300 MHz,  $\text{CDCl}_3$ ):  $\delta$  1.26–1.80 (m, 10 H), 1.77 (t,  $J = 6.9$  Hz, 2 H), 2.25 (s, 3 H), 2.71 (t,  $J = 6.9$  Hz, 2 H), 6.72 (d,  $J = 8.1$  Hz, 1 H), 6.85 (s, 1 H), 6.89 (d,  $J = 8.1$  Hz, 1 H);  $^{13}\text{C}$  NMR (75 MHz,  $\text{CDCl}_3$ ):  $\delta$  20.4, 21.6, 21.8, 26.0, 31.7, 35.1, 74.3, 117.0, 121.2, 127.7, 128.6, 129.7, 151.5.

**Analytical data for 3ad:**<sup>5</sup> colorless oil (Kanto 60, spherical, 40–50  $\mu\text{m}$ ; eluent hexane–AcOEt 150:1);  $^1\text{H}$  NMR (300 MHz,  $\text{CDCl}_3$ ):  $\delta$  0.56 (s, 3 H), 0.89 (s, 3 H), 1.38 (s, 3 H), 1.58–1.86 (m, 6 H), 2.25 (s, 3 H), 2.98 (quint,  $J = 3.3$  Hz, 1 H), 6.60 (d,  $J = 8.4$  Hz, 1 H), 6.84 (d,  $J = 2.0$  Hz, 1 H), 6.89 (dd,  $J = 8.4, 2.0$  Hz, 1 H);  $^{13}\text{C}$  NMR (75 MHz,  $\text{CDCl}_3$ ):  $\delta$  20.5, 29.3, 29.5, 30.2, 32.6, 36.0, 36.7, 45.2, 51.7, 74.8, 114.9, 127.3, 128.1, 128.2, 128.6, 153.4.

**Analytical data for 3af:** pale-yellow oil (Kanto 60N, spherical, 63–210  $\mu\text{m}$ ; eluent

S3

hexane–AcOEt 100:1);  $^1\text{H}$  NMR (300 MHz,  $\text{CDCl}_3$ ):  $\delta$  1.63 (s, 3 H), 2.06 (ddd,  $J = 14.0, 11.0, 5.4$  Hz, 1 H), 2.22 (s, 3 H), 2.30–2.47 (m, 2 H), 2.62 (dt,  $J = 16.5, 5.4$  Hz, 1 H), 6.76 (s, 1 H), 6.88 (d,  $J = 8.2$  Hz, 1 H), 6.94 (dd,  $J = 8.2, 1.5$  Hz, 1 H), 7.16–7.40 (m, 5 H);  $^{13}\text{C}$  NMR (75 MHz,  $\text{CDCl}_3$ ):  $\delta$  20.4, 22.6, 30.2, 33.0, 78.1, 116.6, 121.2, 124.9, 126.6, 128.0, 128.3, 129.0, 129.7, 145.7, 151.9; MS (EI):  $m/z$  (%): 238 (100)  $[\text{M}]^+$ , 223 (50)  $[\text{M} - \text{Me}]^+$ , 209 (6)  $[\text{MH} - 2 \text{CH}_3]^+$ , 147 (8)  $[\text{MH} - \text{Me} - \text{C}_6\text{H}_5]^+$ ; EA calcd (%) for  $\text{C}_{17}\text{H}_{18}\text{O}$  (238.32): C 85.67, H 7.61; found: C 85.62, H 7.75.

**Analytical data for 5ag:**<sup>6</sup> colorless oil (Kanto 60N, spherical, 63–210  $\mu\text{m}$ ; eluent hexane–AcOEt 300:1);  $^1\text{H}$  NMR (300 MHz,  $\text{CDCl}_3$ ):  $\delta$  1.46 (s, 6 H), 2.27 (s, 3 H), 2.97 (s, 2 H), 6.62 (d,  $J = 8.4$  Hz, 1 H), 6.90 (d,  $J = 8.4$  Hz, 1 H), 6.95 (s, 1 H);  $^{13}\text{C}$  NMR (75 MHz,  $\text{CDCl}_3$ ):  $\delta$  20.7, 28.1, 43.0, 86.2, 109.0, 125.7, 127.0, 128.2, 129.1, 156.8.

**Analytical data for 6ag:**<sup>7</sup> white solid, mp 164.0–164.5  $^\circ\text{C}$  [lit.<sup>9</sup> mp 172–173  $^\circ\text{C}$ ] (Kanto 60N, spherical, 63–210  $\mu\text{m}$ ; eluent hexane–AcOEt 3:1);  $^1\text{H}$  NMR (300 MHz,  $\text{CDCl}_3$ ):  $\delta$  0.92 (d,  $J = 6.6$  Hz, 6 H), 2.26 (s, 6 H), 2.64 (dsept,  $J = 10.8, 6.6$  Hz, 1 H), 3.97 (d,  $J = 10.8$  Hz, 1 H), 6.24 (s, 2 H), 6.68 (d,  $J = 8.4$  Hz, 2 H), 6.82 (dd,  $J = 8.4, 1.8$  Hz, 2 H), 7.09 (d,  $J = 1.8$  Hz, 2 H);  $^{13}\text{C}$  NMR (75 MHz,  $\text{CDCl}_3$ ):  $\delta$  20.8, 21.5, 30.1, 43.4, 115.7, 127.4, 127.8, 130.2, 130.6, 150.5.

**Representative Procedures for Cyclocoupling (2) – Synthesis of 3ca:** In a 6-mL reaction tube,  $\text{CpMoCl}(\text{CO})_3$  (14.00 mg, 0.050 mmol) and *o*-chloranil (24.62 mg, 0.10 mmol) were mixed with a solution of *p*-methoxyphenol (1.241 g, 10 mmol) in chlorobenzene (3 mL) at room temperature under Ar atmosphere. After stirring for 30 min at room temperature, to this mixture prenyl alcohol (102  $\mu\text{L}$ , 1.00 mmol) was added by a syringe. Then, the reaction tube was sealed with a teflon cap and heated in a microwave reactor at 150  $^\circ\text{C}$  for 1 h (Temperature–Time Profile 2). After cooling to room temperature, the solution was diluted with ether (5 mL), and was filtered through a pad of alumina. The insoluble materials were further washed with ether (40 mL). The filtrate was washed with 1 N NaOH (40 mL) and extracted with ether (20 mL  $\times$  2). The combined organic layer was dried over  $\text{MgSO}_4$ , and then concentrated in vacuo. The residue was purified by silica gel flash column chromatography (Kanto 60N, spherical, 63–210  $\mu\text{m}$ ; eluent hexane–AcOEt 80:1) to give chroman **3ca** (117.32 mg, 61%) as a colorless oil. The following spectral data were in good agreement with those reported previously;<sup>2</sup>  $^1\text{H}$  NMR (300 MHz,  $\text{CDCl}_3$ ):  $\delta$  1.31 (s, 6 H), 1.78 (t,  $J = 6.9$  Hz, 2 H), 2.75 (t,  $J = 6.9$  Hz, 2 H), 3.75 (s, 3 H), 6.61 (dd,  $J = 2.4, 0.6$  Hz, 1 H), 6.67 (dd,  $J = 8.7, 2.4$  Hz, 1 H), 6.71 (dd,  $J = 8.7, 0.6$  Hz, 1 H);  $^{13}\text{C}$  NMR (75 MHz,  $\text{CDCl}_3$ ):  $\delta$  22.7,



26.7, 32.8, 55.6, 73.7, 113.3, 113.9, 117.7, 121.4, 147.9, 152.8.

**Analytical data for 3ea:**<sup>8</sup> pale-yellow oil (Kanto 60N, spherical, 63–210  $\mu\text{m}$ ; eluent hexane–AcOEt 300:1);  $^1\text{H}$  NMR (300 MHz,  $\text{CDCl}_3$ ):  $\delta$  1.31 (s, 6 H), 1.81 (t,  $J = 6.9$  Hz, 2 H), 2.18 (s, 3 H), 2.23 (s, 3 H), 2.59 (t,  $J = 6.9$  Hz, 2 H), 6.49 (s, 1 H), 6.55 (s, 1 H);  $^{13}\text{C}$  NMR (75 MHz,  $\text{CDCl}_3$ ):  $\delta$  19.0, 20.0, 20.9, 26.7, 32.9, 73.2, 115.4, 116.6, 122.1, 136.4, 136.8, 153.7.

**Analytical data for 3ga:**<sup>2</sup> colorless oil (Kanto 60N, spherical, 63–210  $\mu\text{m}$ ; eluent hexane–AcOEt 300:1);  $^1\text{H}$  NMR (300 MHz,  $\text{CDCl}_3$ ):  $\delta$  1.43 (s, 6 H), 1.90 (t,  $J = 6.6$  Hz, 2 H), 2.89 (t,  $J = 6.6$  Hz, 2 H), 7.16 (d,  $J = 8.4$  Hz, 1 H), 7.31 (d,  $J = 8.4$  Hz, 1 H), 7.38–7.45 (m, 2 H), 7.70–7.76 (m, 1 H), 8.19–8.23 (m, 1 H);  $^{13}\text{C}$  NMR (75 MHz,  $\text{CDCl}_3$ ):  $\delta$  22.8, 26.9, 32.8, 74.4, 114.3, 118.8, 121.6, 124.8, 125.4, 125.7, 127.3, 127.7, 133.3, 148.7.

**Analytical data for 3ha:**<sup>9</sup> colorless solid, mp 74–75  $^\circ\text{C}$  [lit.<sup>10</sup> mp 77–78  $^\circ\text{C}$ ] (Kanto 60N, spherical, 63–210  $\mu\text{m}$ ; eluent hexane–AcOEt 300:1);  $^1\text{H}$  NMR (300 MHz,  $\text{CDCl}_3$ ):  $\delta$  1.41 (s, 6 H), 1.90 (t,  $J = 6.6$  Hz, 2 H), 2.85 (t,  $J = 6.6$  Hz, 2 H), 3.95 (s, 3 H), 6.50 (s, 1 H), 7.42 (dt,  $J = 6.0$ , 2.1 Hz, 1 H), 7.46 (dt,  $J = 6.0$ , 1.8 Hz, 1 H), 8.14 (dd,  $J = 6.0$ , 2.1 Hz, 1 H), 8.17 (dd,  $J = 6.0$ , 1.8 Hz, 1 H);  $^{13}\text{C}$  NMR (75 MHz,  $\text{CDCl}_3$ ):  $\delta$  23.3, 26.7, 33.0, 55.7, 73.8, 105.4, 113.3, 121.3, 121.6, 124.9, 125.3, 125.5, 126.5, 142.5, 148.5.

**Procedures for Synthesis of 3ae:** In a 30-mL round bottom flask,  $\text{CpMoCl}(\text{CO})_3$  (14.00 mg, 0.050 mmol) and *o*-chloranil (24.57 mg, 0.10 mmol) were mixed with *p*-cresol (1 mL) at room temperature under Ar atmosphere. After stirring for 30 min at room temperature, to this mixture a solution of cinnamyl alcohol (134.19 mg, 1.00 mmol) in *p*-cresol (2 mL) was added by a syringe. Then, the reaction mixture was heated on an oil bath at 60  $^\circ\text{C}$  for 3 h. After cooling to room temperature, the solution was diluted with ether (5 mL), and filtered through a pad of alumina. The insoluble materials were further washed with ether (40 mL). The filtrate was washed with 1 N NaOH (40 mL) and extracted with ether (20 mL  $\times$  2). The combined organic layer was dried over  $\text{MgSO}_4$ , and then concentrated in vacuo. The residue was purified by silica gel flash column chromatography (Kanto 60N, spherical, neutral, 63–210  $\mu\text{m}$ ; eluent hexane–AcOEt 20:1) to give **4ae** (149.50 mg, 67%) as a colorless oil. The following spectral data were in good agreement with those reported previously;<sup>10</sup>  $^1\text{H}$  NMR (300 MHz,  $\text{CDCl}_3$ ):  $\delta$  2.28 (s, 3 H), 3.54 (d,  $J = 6.0$  Hz, 2 H), 4.76 (br s, 1 H), 6.38 (dt,  $J = 16.0$ , 6.0 Hz, 2 H), 6.51 (d,  $J = 16.0$  Hz, 1 H), 6.72 (d,  $J = 8.1$  Hz, 1 H),

6.95 (d,  $J = 8.1$  Hz, 1 H), 6.98 (s, 1 H), 7.18–7.40 (m, 5 H);  $^{13}\text{C}$  NMR (75 MHz,  $\text{CDCl}_3$ ):  $\delta$  20.4, 33.9, 115.5, 125.5, 126.1, 127.1, 128.1, 128.4, 130.1, 130.9, 131.2, 137.2, 151.5.

In a 6-mL reaction tube,  $\text{CpMoCl}(\text{CO})_3$  (14.03 mg, 0.050 mmol) and *o*-chloranil (24.58 mg, 0.10 mmol) were mixed with chlorobenzene (1 mL) at room temperature under Ar atmosphere. After stirring for 30 min at room temperature, to this mixture a solution of above prepared **4ae** (224.78 mg, 1.00 mmol) in chlorobenzene (2 mL) was added by a syringe. Then, the reaction tube was sealed with a teflon cap and heated in a microwave reactor at 150 °C for 1 h (Temperature-Time Profile 3). After cooling to room temperature, the solution was diluted with ether (5 mL), and was filtered through a pad of alumina. The insoluble materials were further washed with ether (40 mL). The filtrate was concentrated in vacuo and was purified by silica gel flash column chromatography (Kanto 60N, spherical, neutral, 63–210  $\mu\text{m}$ ; eluent hexane–AcOEt 100:1) to give chroman **3ae** (166.20 mg, 74%) as a pale-yellow oil. The following spectral data were in good agreement with those reported previously;<sup>11</sup>  $^1\text{H}$  NMR (300 MHz,  $\text{CDCl}_3$ ):  $\delta$  2.07 (dddd,  $J = 13.5, 11.1, 10.2, 5.2$  Hz, 1 H), 2.20 (dddd,  $J = 13.5, 6.2, 3.4, 2.4$  Hz, 1 H), 2.28 (s, 3 H), 2.76 (ddd,  $J = 16.8, 5.2, 3.4$  Hz, 1 H), 2.97 (ddd,  $J = 16.8, 11.1, 6.2$  Hz, 1 H), 5.04 (dd,  $J = 10.2, 2.4$  Hz, 1 H), 6.82 (d,  $J = 8.2$  Hz, 1 H), 6.91 (s, 1 H), 6.93 (d,  $J = 8.2$  Hz, 1 H), 7.28–7.45 (m, 5 H);  $^{13}\text{C}$  NMR (75 MHz,  $\text{CDCl}_3$ ):  $\delta$  20.5, 25.0, 30.0, 77.6, 116.6, 121.4, 126.0, 127.7, 127.9, 128.4, 129.4, 129.8, 141.9, 152.9.

**Procedures for Synthesis of 3fa:** In a 30-mL round bottom flask,  $\text{CpMoCl}(\text{CO})_3$  (14.00 mg, 0.050 mmol) and *o*-chloranil (24.63 mg, 0.10 mmol) were mixed with a solution of  $\beta$ -naphthol (1.442 g, 10.0 mmol) in chlorobenzene (3 mL) at room temperature under Ar atmosphere. After stirring for 30 min at room temperature, to this mixture a solution of prenyl alcohol (102  $\mu\text{L}$ , 1.00 mmol) was added by a syringe. Then, the reaction mixture was heated on an oil bath at 60 °C for 6 h. After cooling to room temperature, the solution was diluted with ether (5 mL), and filtered through a pad of alumina. The insoluble materials were further washed with ether (40 mL). The filtrate was washed with 1 N NaOH (40 mL) and extracted with ether (20 mL  $\times$  2). The combined organic layer was dried over  $\text{MgSO}_4$ , and then concentrated in vacuo. The residue was purified by silica gel flash column chromatography (Kanto 60N, spherical 63–210  $\mu\text{m}$ ; eluent hexane–AcOEt 200:1) to give **3fa** (147.97 mg, 70%) as white solid (mp 68–69 °C). The following spectral data were in good agreement with those reported previously;<sup>2</sup>  $^1\text{H}$  NMR (300 MHz,  $\text{CDCl}_3$ ):  $\delta$  1.39 (s, 6 H), 1.96 (t,  $J$

= 6.6 Hz, 2 H), 3.04 (t,  $J$  = 6.6 Hz, 2 H), 7.02 (d,  $J$  = 8.9 Hz, 1 H), 7.33 (ddd,  $J$  = 7.8, 6.8, 0.9 Hz, 1 H), 7.48 (ddd,  $J$  = 8.4, 6.8, 1.2 Hz, 1 H), 7.62 (d,  $J$  = 8.9 Hz, 1 H), 7.75 (d,  $J$  = 7.8 Hz, 1 H), 7.83 (d,  $J$  = 8.4 Hz, 1 H);  $^{13}\text{C}$  NMR (75 MHz,  $\text{CDCl}_3$ ):  $\delta$  19.3, 26.5, 32.7, 74.0, 112.4, 119.7, 121.8, 122.9, 126.2, 127.7, 128.4, 128.7, 133.0, 151.3.

**Representative Procedures for Cyclocoupling (3) – Synthesis of 8a:** In a 6-mL reaction tube,  $[\text{CpMo}(\text{CO})_3]_2$  (12.23 mg, 0.025 mmol) and *o*-chloranil (24.55 mg, 0.10 mmol) were mixed with a solution of trimethylhydroquinone (152.18 mg, 1.00 mmol) in chlorobenzene (3 mL) at  $-78^\circ\text{C}$ , and the reaction mixture was degassed at this temperature. After stirring for 30 min at room temperature under Ar atmosphere, to this mixture degassed prenyl alcohol (205  $\mu\text{L}$ , 2.00 mmol) was added by a syringe. Then, the reaction tube was sealed with a teflon cap and heated in a microwave reactor at  $150^\circ\text{C}$  for 1 h (Temperature-Time Profile 4). After cooling to room temperature, the solution was diluted with AcOEt (5 mL), and was filtered through a pad of alumina. The insoluble materials were further washed with AcOEt (60 mL). The filtrate was concentrated in vacuo, and the residue was purified by silica gel flash column chromatography (Kanto 60, spherical, 40–50  $\mu\text{m}$ ; eluent hexane–AcOEt 100:1) to give chroman **8a** (176.86 mg, 80%) as a colorless needle (mp.  $94.0$ – $94.5^\circ\text{C}$ ; lit.<sup>12</sup> mp  $93$ – $94^\circ\text{C}$ ). The following spectral data were in good agreement with those reported previously;<sup>13</sup>  $^1\text{H}$  NMR (300 MHz,  $\text{CDCl}_3$ ):  $\delta$  1.29 (s, 6 H), 1.79 (t,  $J$  = 6.9 Hz, 2 H), 2.11 (s, 6 H), 2.16 (s, 3 H), 2.62 (t,  $J$  = 6.9 Hz, 2 H), 4.18 (s, 1 H);  $^{13}\text{C}$  NMR (75 MHz,  $\text{CDCl}_3$ ):  $\delta$  11.2, 11.7, 12.2, 21.0, 26.6, 33.0, 72.4, 117.1, 118.6, 121.1, 122.5, 144.6, 145.7.

**Analytical data for 8b (all-rac):** pale-yellow oil (Kanto 60, spherical, 40–50  $\mu\text{m}$ ; eluent hexane–AcOEt 150:1);  $^1\text{H}$  NMR (300 MHz,  $\text{CDCl}_3$ ):  $\delta$  0.82–0.88 (m, 12 H), 1.00–1.60 (m, 21 H), 1.23 (s, 3 H), 1.75 (dt,  $J$  = 13.5, 6.9 Hz, 1 H), 1.82 (dt,  $J$  = 13.5, 7.2 Hz, 1 H), 2.11 (s, 6 H), 2.16 (s, 3 H), 2.60 (t,  $J$  = 6.6 Hz, 2 H), 4.17 (s, 1 H);  $^{13}\text{C}$  NMR (75 MHz,  $\text{CDCl}_3$ ):  $\delta$  11.2–12.2 (3 peak tops,  $\text{CH}_3$ ), 19.6–19.74 (4 peak tops,  $\text{CH}_3$ ), 20.8 ( $\text{CH}_2$ ), 21.1 ( $\text{CH}_2$ ), 22.6–22.7 (2 peak tops,  $\text{CH}_3$ ), 23.8 ( $\text{CH}_3$ ), 24.4 ( $\text{CH}_2$ ), 28.0 (CH), 31.5–31.6 (2 peak tops,  $\text{CH}_2$ ), 32.7–32.8 (3 peak tops, CH), 37.3–37.7 (7 peak tops,  $\text{CH}_2$ ), 39.4 ( $\text{CH}_2$ ), 39.8–39.9 (2 peak tops,  $\text{CH}_2$ ), 74.5, 117.3, 118.5, 121.1, 122.6, 144.5, 145.6. These spectral data were in good agreement with an authentic sample (DL- $\alpha$ -tocopherol, purity >98%) purchased from Wako Pure Chemical Industries (cat. No. 209-01791).

**Analytical data for 11:** white solid, mp  $103$ – $104^\circ\text{C}$  [lit.<sup>14</sup> mp  $107^\circ\text{C}$ ] (Kanto 60, spherical,



40–50  $\mu\text{m}$ ; eluent hexane– $\text{CH}_2\text{Cl}_2$  20:1);  $^1\text{H}$  NMR (300 MHz,  $\text{CDCl}_3$ ):  $\delta$  1.39 (s, 12 H), 1.91 (t,  $J$  = 6.9 Hz, 4 H), 2.69 (t,  $J$  = 6.9 Hz, 4 H), 7.39 (dd,  $J$  = 6.3, 3.6 Hz, 2 H), 8.13 (dd,  $J$  = 6.3, 3.6 Hz, 2 H);  $^{13}\text{C}$  NMR (75 MHz,  $\text{CDCl}_3$ ):  $\delta$  20.2, 26.7, 33.0, 72.9, 113.2, 121.2, 124.6, 125.1, 141.7; MS (EI):  $m/z$  (%): 296 (73)  $[\text{M}]^+$ , 240 (100)  $[\text{M} - \text{CH}_2=\text{CMe}_2]^+$ , 225 (25)  $[\text{M} - \text{H} - \text{CH}_2\text{CH}_2\text{CMe}_2]^+$ .

**Representative Procedures for Cyclocoupling (4) – Synthesis of 8c:** In a 6-mL reaction tube,  $[\text{CpMo}(\text{CO})_3]_2$  (12.26 mg, 0.025 mmol) and *o*-chloranil (24.57 mg, 0.10 mmol) were mixed with a solution of tetramethylhydroquinone (152.19 mg, 1.00 mmol) in chlorobenzene (3 mL) at  $-78^\circ\text{C}$ , and the reaction mixture was degassed at this temperature. After stirring for 30 min at room temperature under Ar atmosphere, to this mixture was added degassed cyclohexylideneethanol (270  $\mu\text{L}$ , 2.00 mmol) by a syringe. Then, the reaction tube was sealed with a teflon cap and heated in a microwave reactor at  $150^\circ\text{C}$  for 0.5 h (Temperature-Time Profile 5). After cooling to room temperature, to the reaction mixture was added degassed cyclohexylideneethanol (270  $\mu\text{L}$ , 2.00 mmol) by a syringe. The mixture was again degassed at  $-78^\circ\text{C}$  and was subjected to the microwave heating at  $150^\circ\text{C}$  for 0.5 h (Temperature-Time Profile 6). The crude mixture was diluted with AcOEt (5 mL), and was filtered through a pad of alumina. The insoluble materials were further washed with AcOEt (60 mL). The filtrate was concentrated in vacuo, and the residue was purified by silica gel flash column chromatography (Kanto 60, spherical, 40–50  $\mu\text{m}$ ; eluent hexane– $\text{CH}_2\text{Cl}_2$  10:1) to give chroman **8c** (160.93 mg, 62%) as a colorless oil;  $^1\text{H}$  NMR (300 MHz,  $\text{CDCl}_3$ ):  $\delta$  1.23–1.37 (m, 3 H), 1.47–1.57 (m, 2 H), 1.62–1.85 (m, 5 H), 1.77 (t,  $J$  = 6.9 Hz, 2 H), 2.11 (s, 3 H), 2.18 (s, 3 H), 2.19 (s, 3 H), 2.62 (t,  $J$  = 6.9 Hz, 2 H), 4.19 (s, 1 H);  $^{13}\text{C}$  NMR (75 MHz,  $\text{CDCl}_3$ ):  $\delta$  11.2, 11.7, 12.2, 20.3, 21.9, 26.2, 32.6, 34.9, 73.0, 117.7, 118.6, 121.0, 122.8, 144.7, 145.2; MS (EI):  $m/z$  (%): 260 (51)  $[\text{M}]^+$ , 165 (100)  $[\text{MH} - \text{methylenecyclohexane}]^+$ ; This compound is unstable and decompose to black viscous oil. Thus, elemental analysis was omitted.

**Analytical data for 8d:** white solid, mp  $138\text{--}139^\circ\text{C}$  (This compound was purified twice. Kanto 60, spherical, 40–50  $\mu\text{m}$ ; eluent hexane–AcOEt 100:1; hexane–toluene 1:1);  $^1\text{H}$  NMR (300 MHz,  $\text{CDCl}_3$ ):  $\delta$  0.50 (s, 3 H), 0.88 (s, 3 H), 1.37 (s, 3 H), 1.39 (d,  $J$  = 14.7 Hz, 1 H), 1.53–1.71 (m, 4 H), 1.79 (d,  $J$  = 14.7, 1 H), 2.08 (s, 3 H), 2.15 (s, 3 H), 2.17 (s, 3 H), 3.13–3.19 (m, 1 H), 4.11 (br s, 1 H);  $^{13}\text{C}$  NMR (75 MHz,  $\text{CDCl}_3$ ):  $\delta$  10.6, 11.7, 12.2, 29.1, 29.4, 29.8, 30.3, 36.4, 36.7, 43.1, 51.8, 73.4, 117.3, 120.6, 121.0, 122.8, 144.1, 147.5; MS (EI):  $m/z$  (%): 274 (100)  $[\text{M}]^+$ , 259 (7)  $[\text{M} - \text{Me}]^+$ , 203 (50)  $[\text{MH} - \text{CH}_2\text{C}(\text{CH}_3)_2\text{CH}_2]^+$ ; EA calcd (%) for  $\text{C}_{18}\text{H}_{26}\text{O}_2$  (274.40): C 78.79, H



9.55; found: C 78.74, H 9.59.

**Procedures for Synthesis of 10:** To a solution of naphthoic acid (4.08 g, 20 mmol) in a mixed solvent (dry ether 30 mL / dry methanol 10 mL) was added a solution of TMSCHN<sub>2</sub> in THF (2 M solution, 15 mL, 30 mmol) over 45 min via a syringe pump at -30 °C under Ar atmosphere. The solution was concentrated in vacuo and the residue was passed through a short silica gel column (Kanto 60N, spherical 63–210 µm; eluent hexane–AcOEt 1:1). Recrystallization of the crude product from hexane/AcOEt gave **9** (3.51 g, 80%) as colorless solid (mp 192.5–193.5 °C; lit.<sup>15</sup> mp 192–193.5 °C). The following spectral data were in good agreement with those reported previously;<sup>15</sup> <sup>1</sup>H NMR (300 MHz, CDCl<sub>3</sub>): δ 3.98 (s, 3 H), 4.87 (s, 1 H), 7.11 (s, 1 H), 7.58 (t, *J* = 8.1 Hz, 1 H), 7.66 (t, *J* = 8.1 Hz, 1 H), 8.13 (d, *J* = 8.1 Hz, 1 H), 8.41 (d, *J* = 8.1 Hz, 1 H), 11.55 (s, 1 H); <sup>13</sup>C NMR (75 MHz, DMSO-*d*<sub>6</sub>): δ 52.4, 103.9, 104.7, 122.2, 123.2, 124.9, 126.3, 128.6, 129.1, 145.2, 152.8, 170.6.

In a 6-mL reaction tube, CpMoCl(CO)<sub>3</sub> (28.05 mg, 0.10 mmol) and *o*-chloranil (49.18 mg, 0.20 mmol) were mixed with a solution of above prepared **9** (218.21 mg, 1.00 mmol) in chlorobenzene (3 mL) at -78 °C, and the reaction mixture was degassed at this temperature. After stirring for 30 min at room temperature under Ar atmosphere, to this mixture degassed isoprene (400 µL, 4.00 mmol) was added by a syringe. Then, the reaction tube was sealed with a teflon cap and heated in a microwave reactor at 150 °C for 30 min (Temperature-Time Profile 7). After cooling to room temperature, the solution was diluted with hexane (5 mL), and was filtered through a pad of alumina. The insoluble materials were washed with hexane (40 mL) to remove oligomeric byproducts. Then the crude product was eluted with AcOEt (60 mL). The filtrate was concentrated in vacuo, and the residue was purified by silica gel flash column chromatography (Kanto 60, spherical, 40–50 µm; eluent hexane–toluene 10:1) to give dihydromollugin **10** (155.25 mg, 54%) as a pale-yellow solid (mp. 96.5–97.0 °C; lit.<sup>16</sup> mp 98–99 °C). The following spectral data were in good agreement with those reported previously;<sup>16</sup> <sup>1</sup>H NMR (300 MHz, CDCl<sub>3</sub>): δ 1.41 (s, 6 H), 1.83 (t, *J* = 6.9 Hz, 2 H), 3.06 (t, *J* = 6.9 Hz, 2 H), 3.99 (s, 3 H), 7.49 (t, *J* = 8.4 Hz, 1 H), 7.60 (t, *J* = 8.4 Hz, 1 H), 8.18 (d, *J* = 8.4 Hz, 1 H), 8.37 (d, *J* = 8.4 Hz, 1 H), 12.16 (s, 1 H); <sup>13</sup>C NMR (75 MHz, CDCl<sub>3</sub>): δ 23.3, 26.5, 33.3, 51.9, 73.0, 105.2, 111.6, 121.6, 123.7, 124.4, 125.6, 129.0, 129.5, 141.6, 156.2, 173.0.

## VI. References.

1. Dintzner, M. R.; McClelland, K. M.; Morse, K. M.; Akroush, M. H. *Synlett* **2004**, 2028–2030.
2. Youn, S. W.; Eom, J. I. *J. Org. Chem.* **2006**, *71*, 6705–6707.
3. Ollevier, T.; Mwene-Mbeja, T. M. *Synthesis* **2006**, 3963–3966.
4. Cannone, P.; Bélanger, D.; Lemay, G. *Synthesis* **1980**, *347*, 301–303.
5. Malkov, A. V.; Davis, S. L.; Baxendale, I. R.; Mitchell, W. L.; Kočovský, P. *J. Org. Chem.* **1999**, *64*, 2751–2764.
6. Lafrance, M.; Gorelsky, S. I.; Fagnou, K. *J. Am. Chem. Soc.* **2007**, *129*, 14570–14571.
7. Biali, S. E.; Bhmer, V.; Cohen, S.; Ferguson, G.; Grttner, C.; Grynszpan, F.; Paulus, E. F.; Thondorf, I.; Vogt, W. *J. Am. Chem. Soc.* **1996**, *118*, 12938–12949.
8. Dauben, W. G.; Cogen, J. M.; Behar, V. *Tetrahedron Lett.* **1990**, *31*, 3241–3244.
9. Lee, Y. R.; Kim, Y. M. *Helv. Chim. Acta* **2007**, *90*, 2401–2413.
10. Zhang, W.; Haight, A. R.; Hsu, M. C. *Tetrahedron Lett.* **2002**, *43*, 6575–6578.
11. Hodgetts, K. J. *Tetrahedron* **2005**, *61*, 6860–6870.
12. Bolzoni, L.; Casiraghi, G.; Casnati, G.; Sartori, G. *Angew. Chem. Int. Ed. Engl.* **1978**, *17*, 684–685.
13. Witkowski, S.; Paradowska, K.; Wawer, I. *Magn. Reson. Chem.* **2004**, *42*, 863–869.
14. Sandermann, W.; Simatupang, M. *Tetrahedron Lett.* **1963**, 1269–1272.
15. Lee, K.-I.; Park, Y.; Park, S.-J.; Hwang, J.-H.; Lee, S.-J.; Kim, G.-D.; Park, W.-K.; Lee, S.; Jeong, D.; Kong, J.-Y.; Kang, H.-K.; Cho, H. *Bioorg. Med. Chem. Lett.* **2006**, *16*, 737–742.
16. Lee, Y. R.; Wang, X.; Kim, Y. M.; Shim, J. J.; Kim, B. N.; Han, D. H. *Bull. Korean Chem. Soc.* **2007**, *28*, 1735–1738.

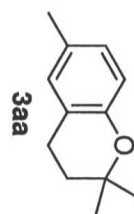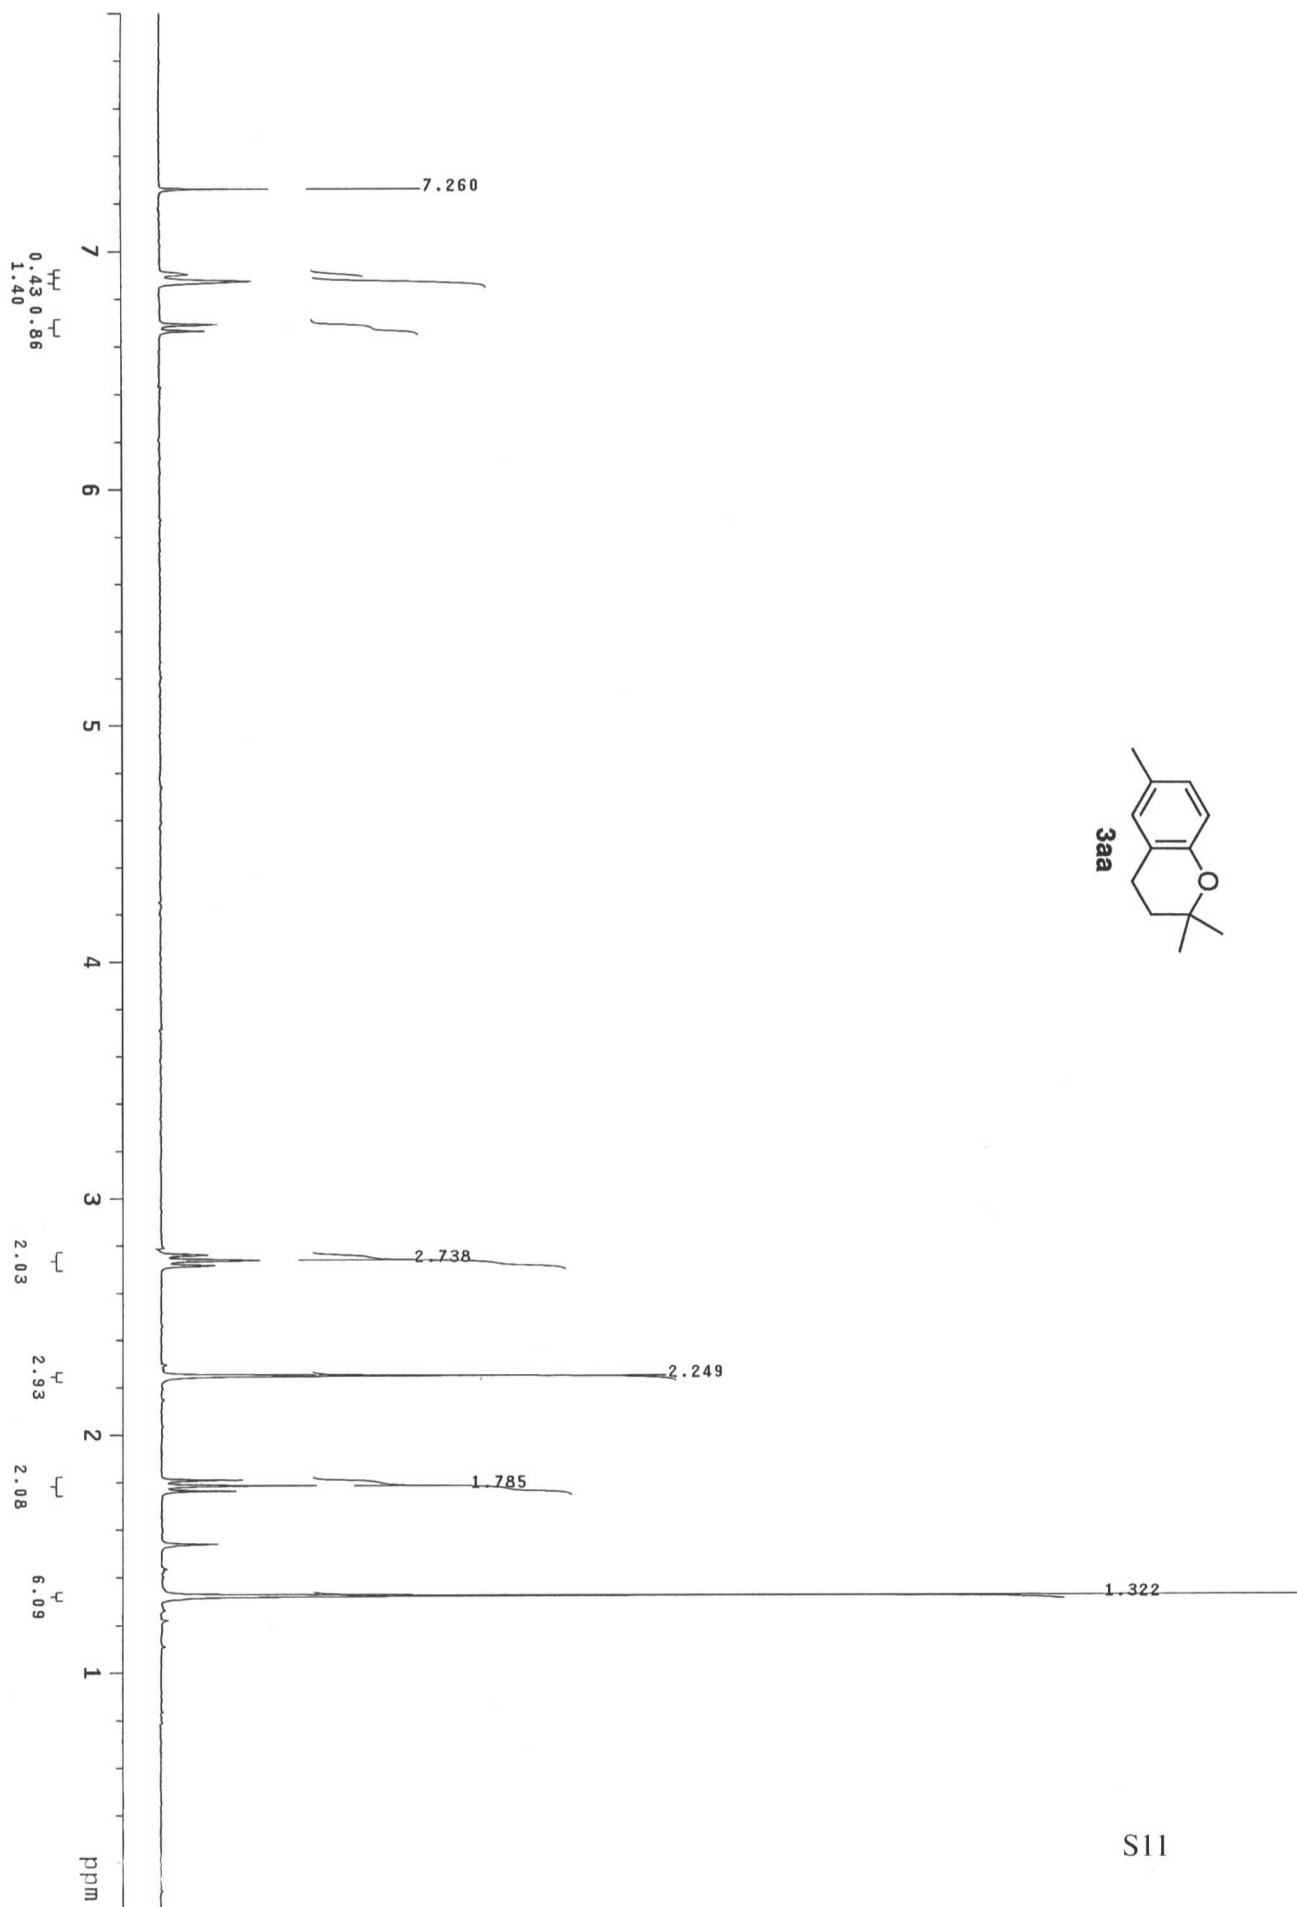

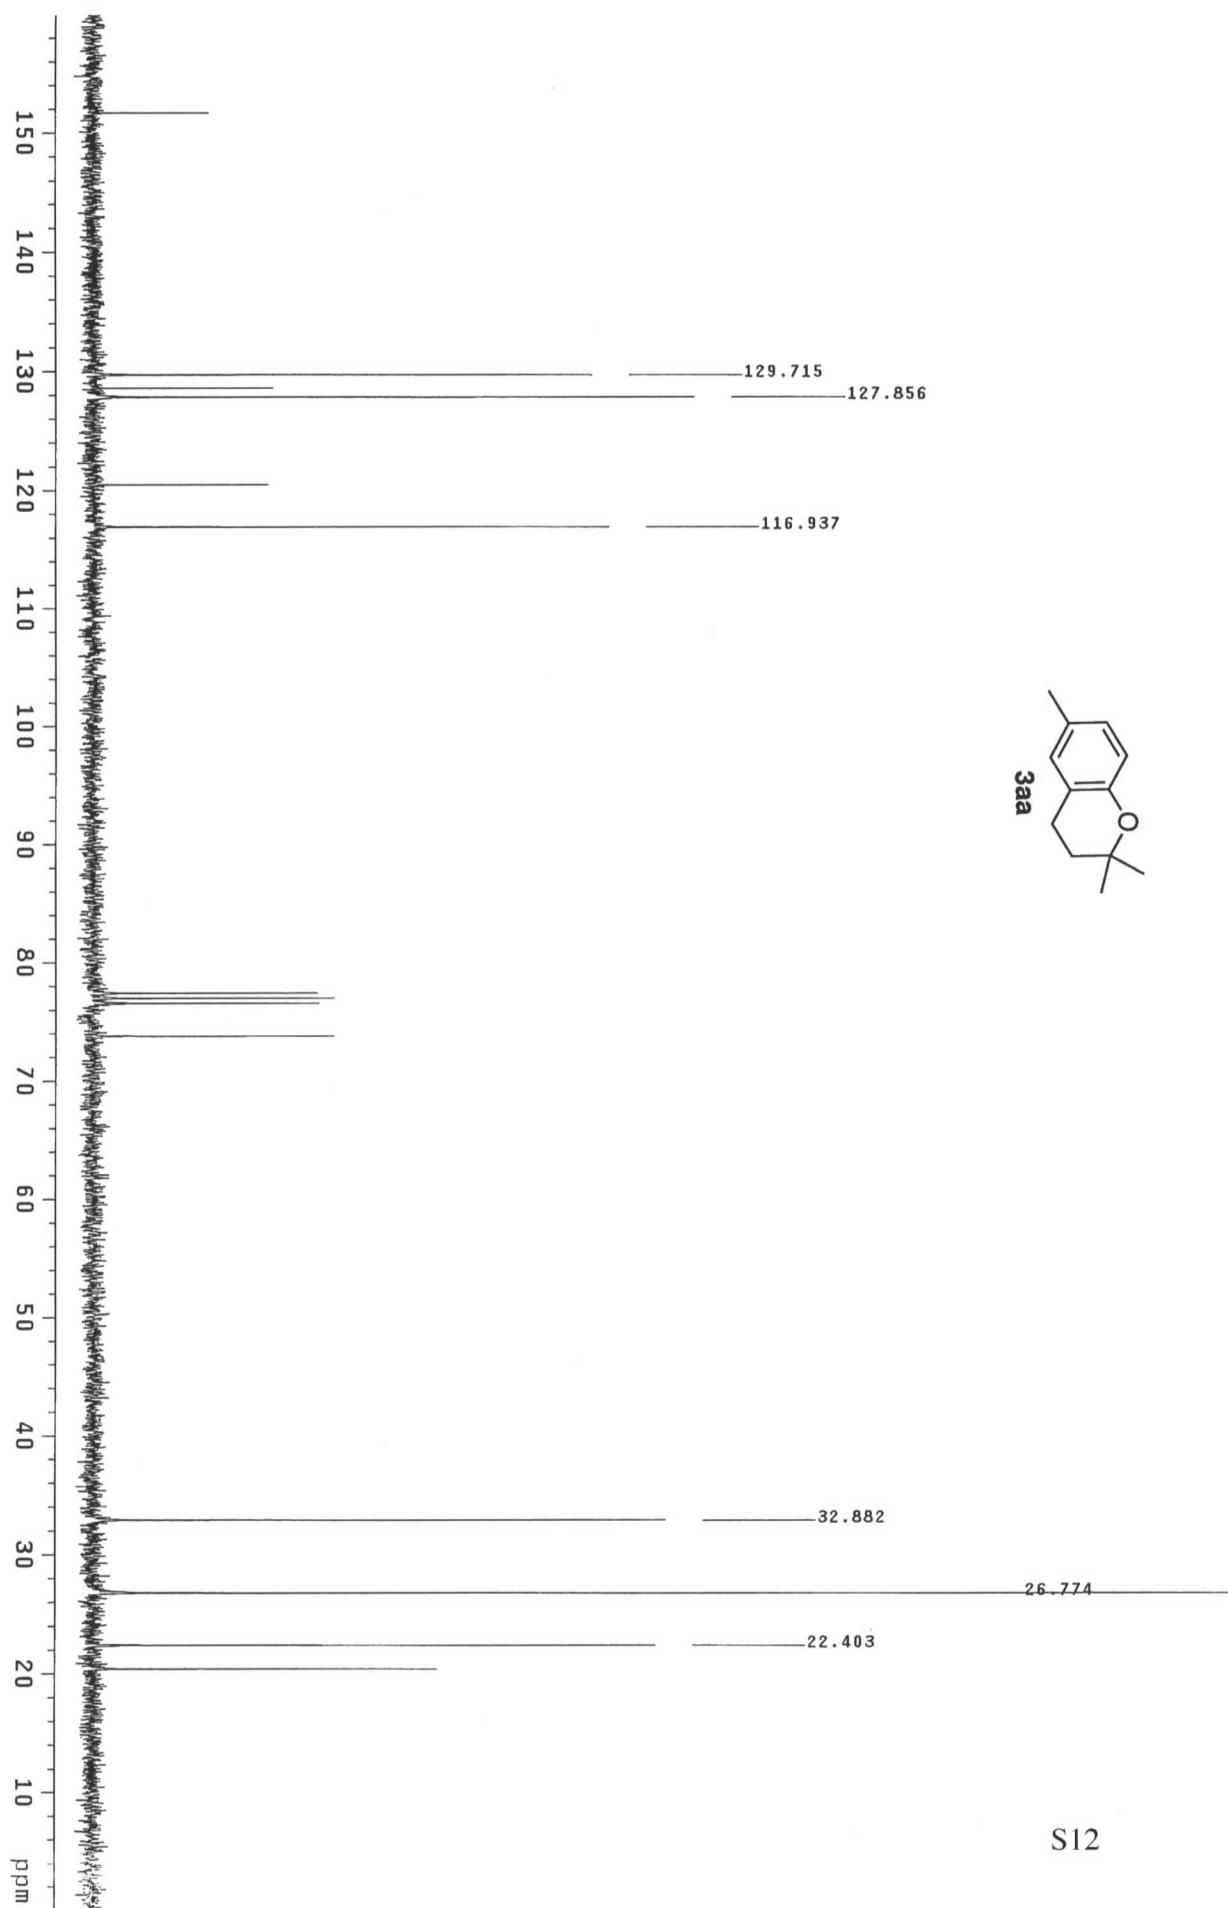



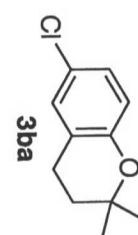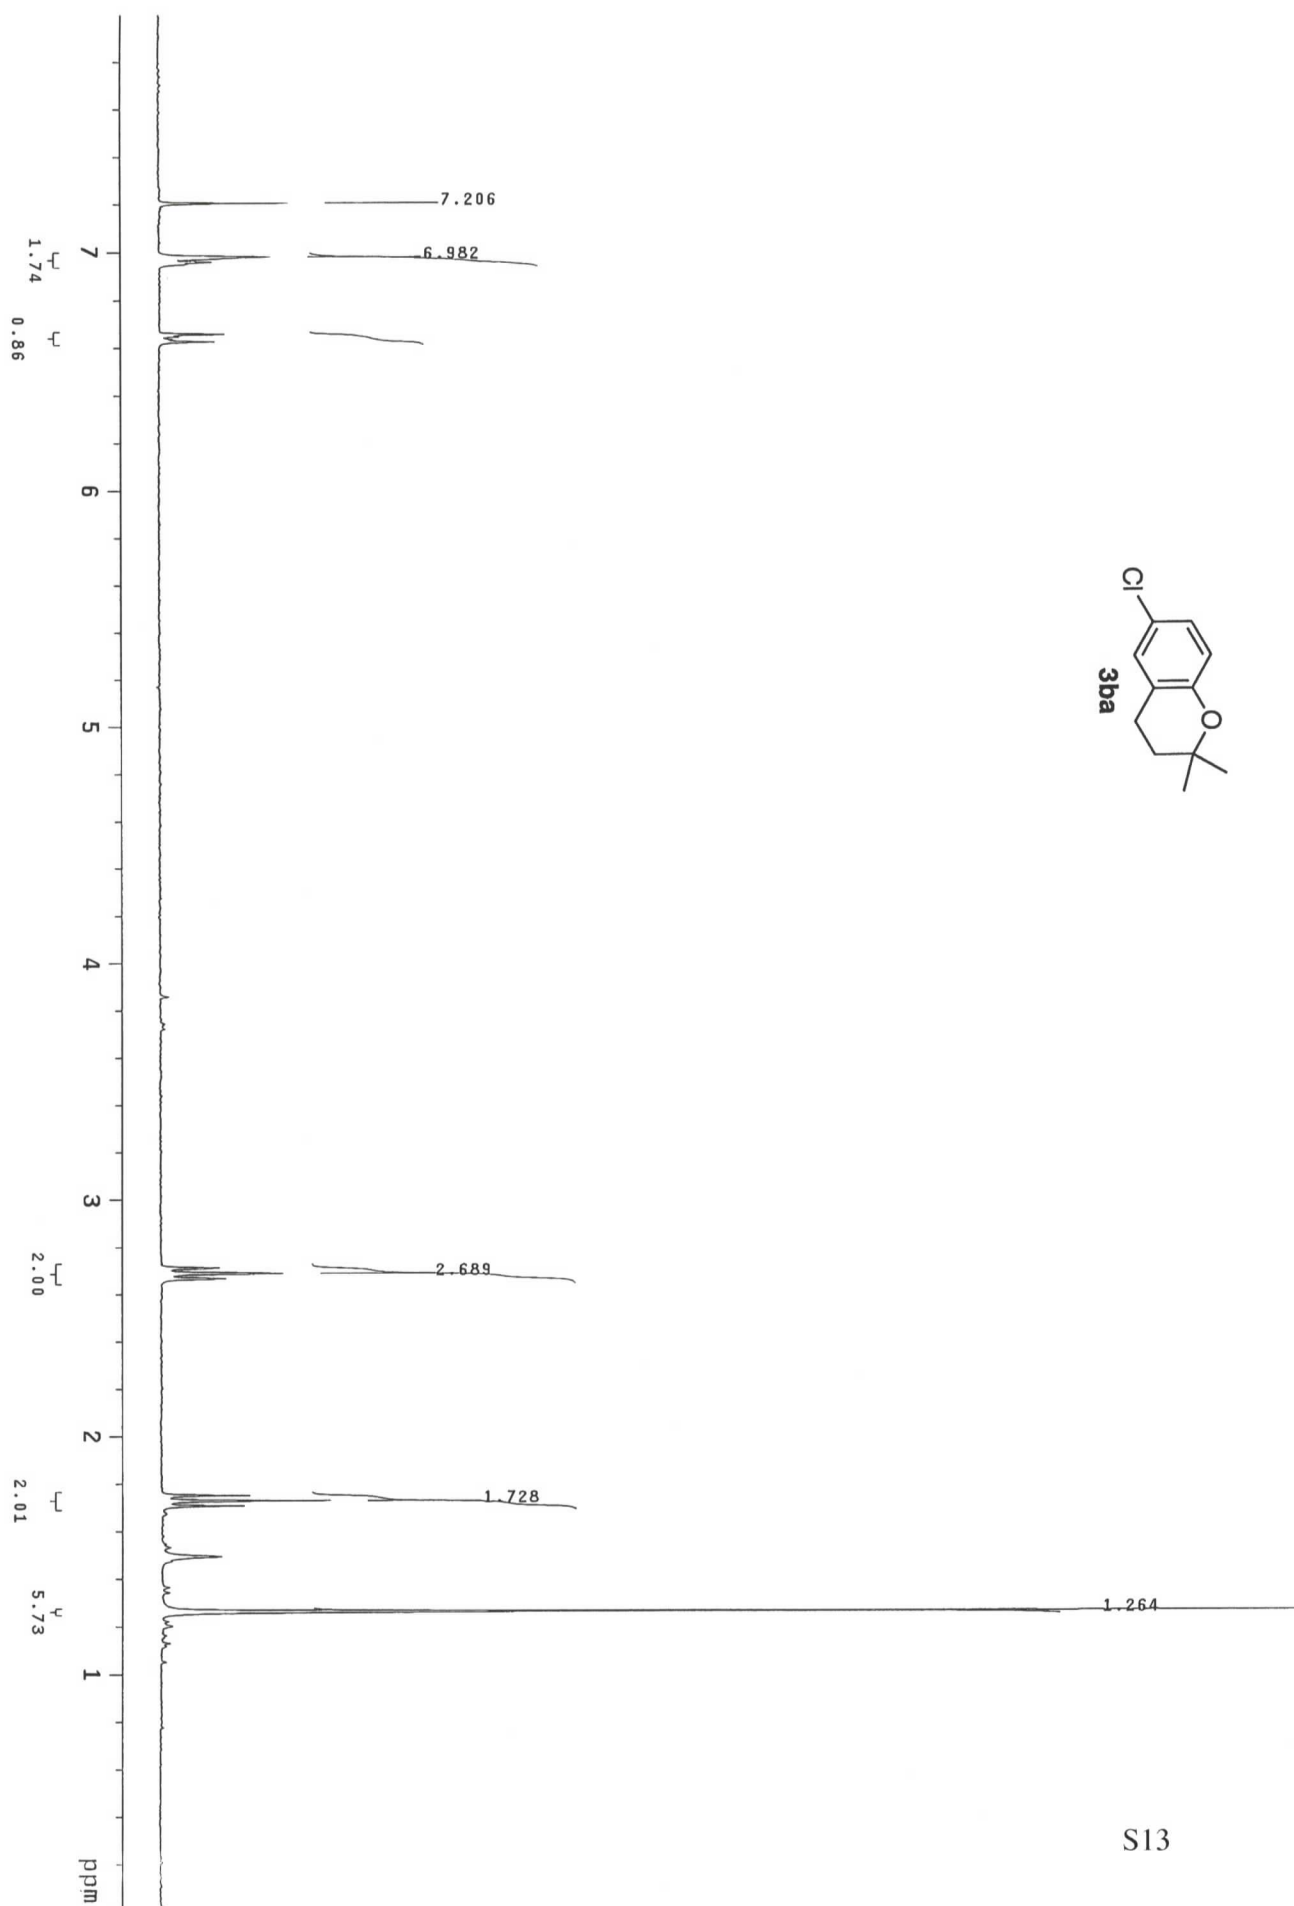

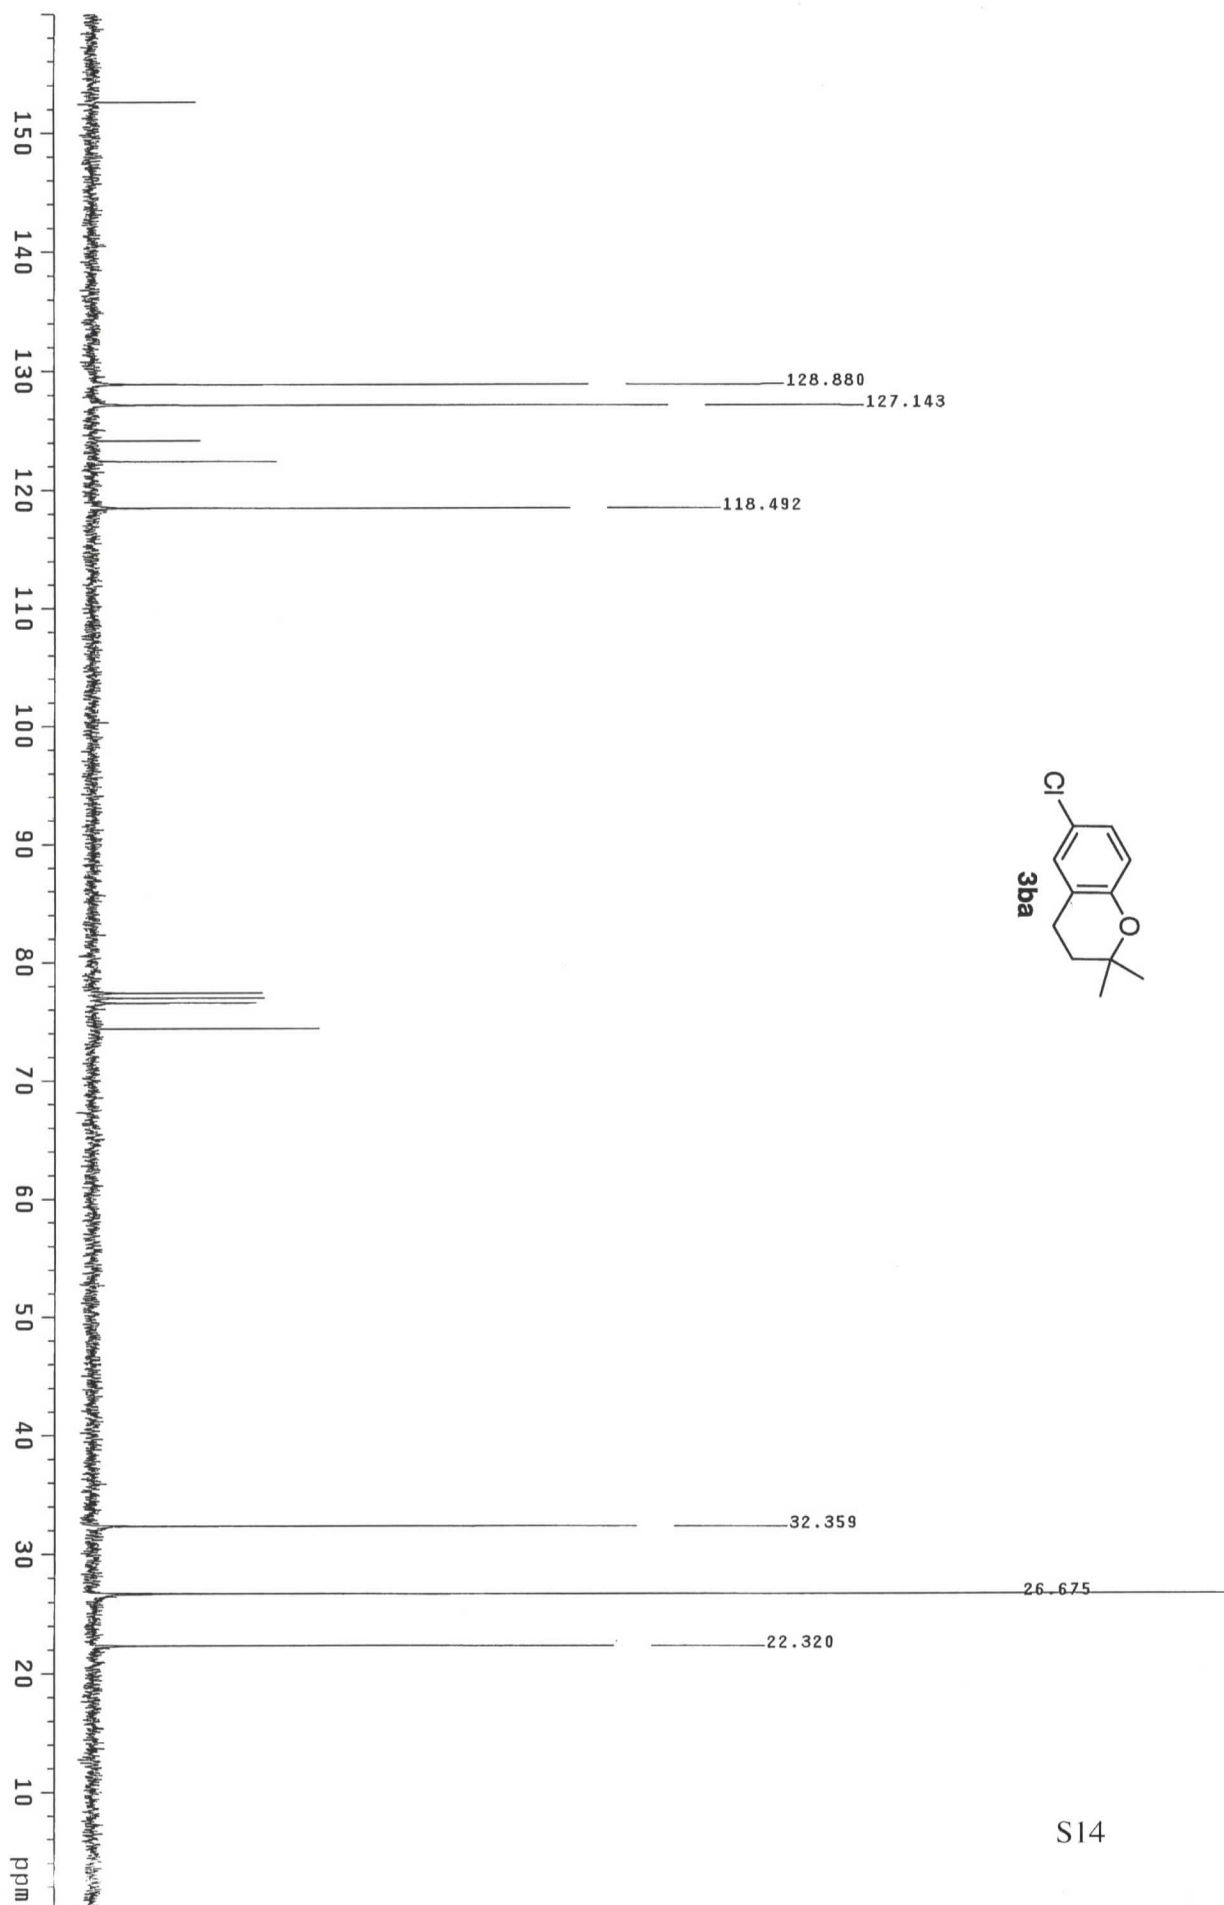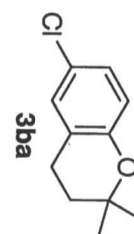

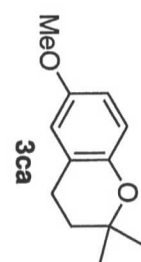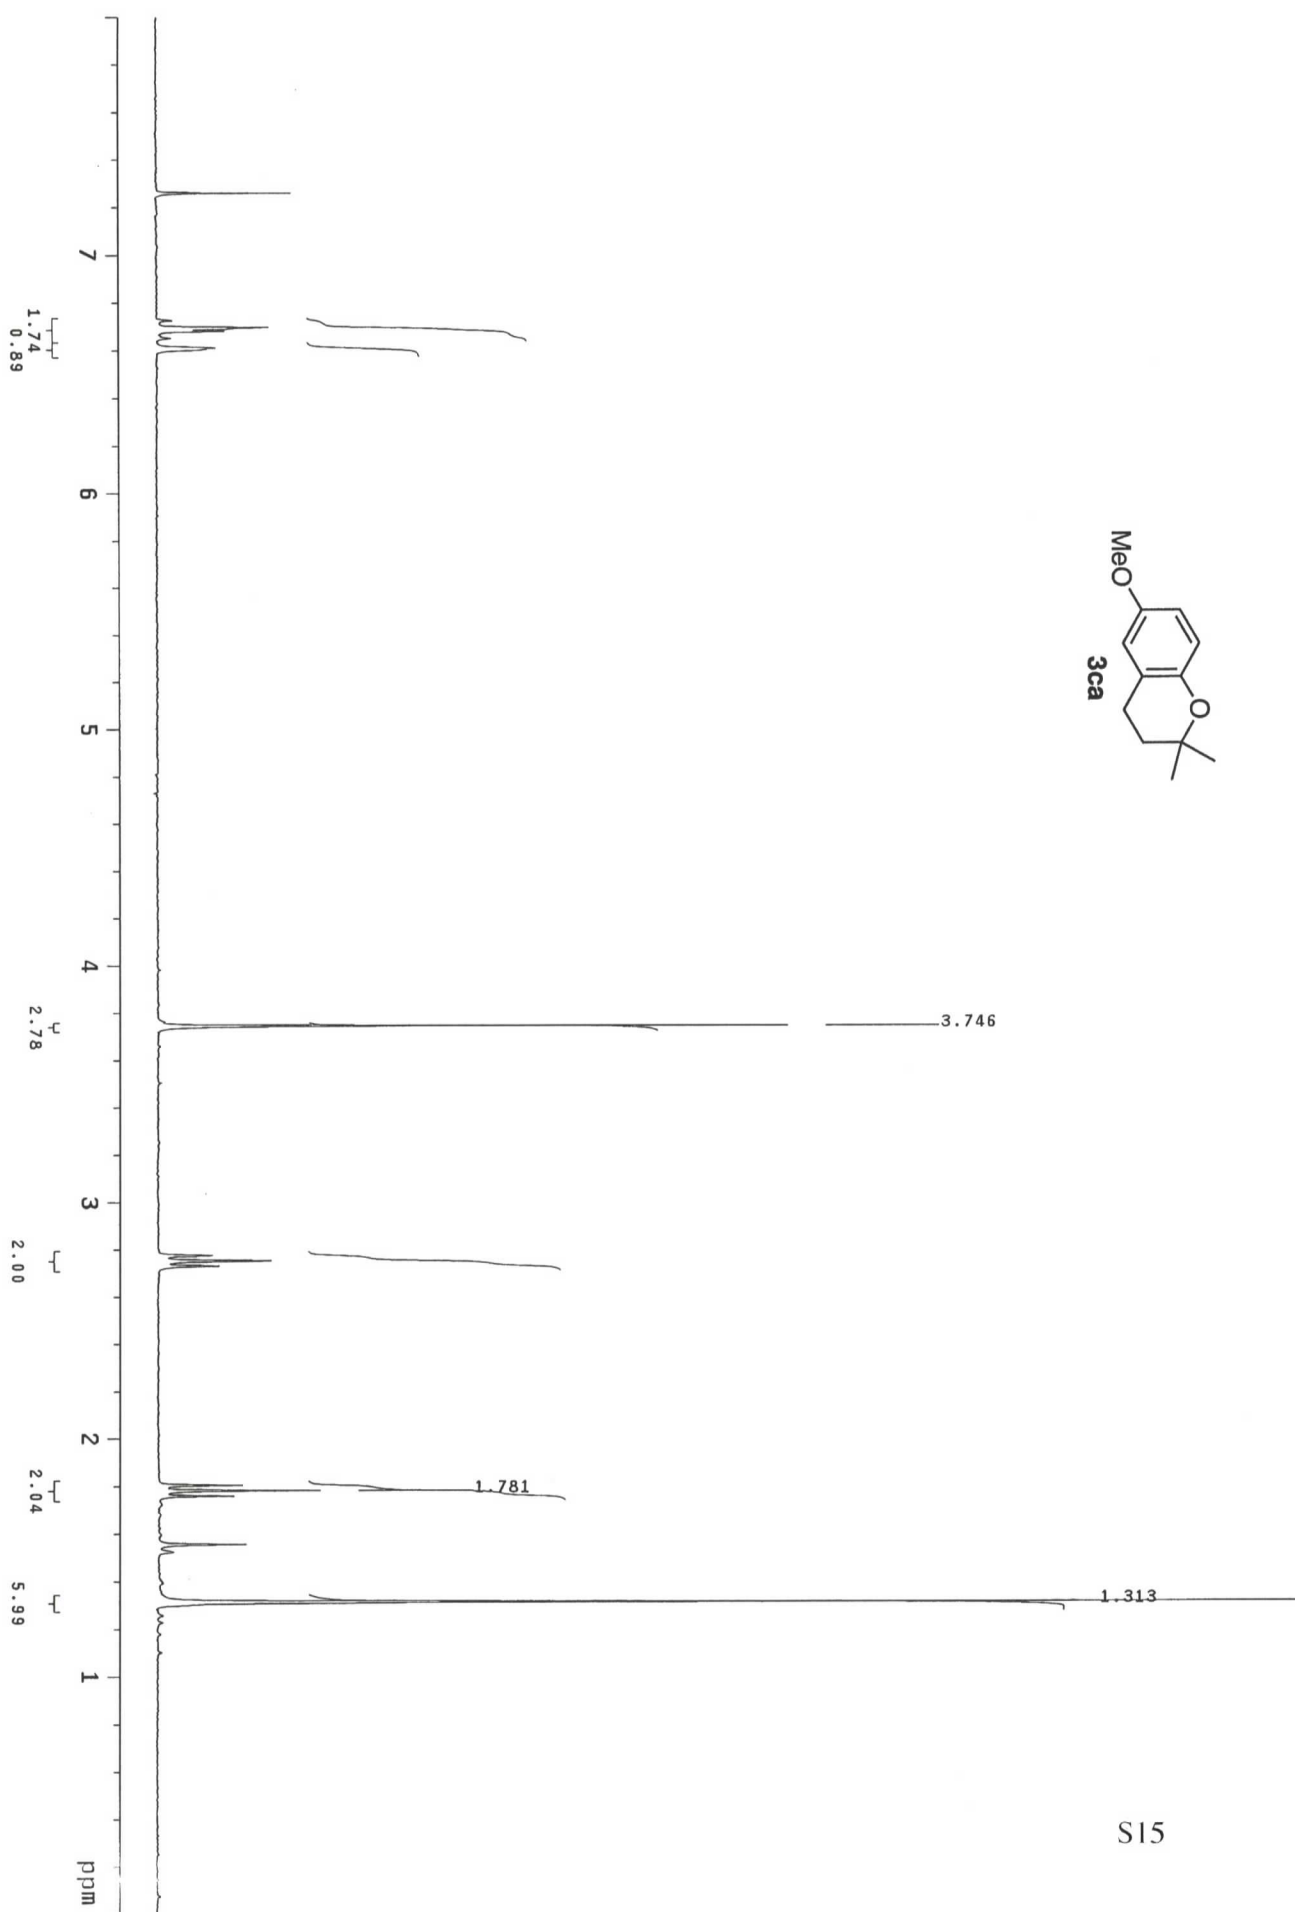

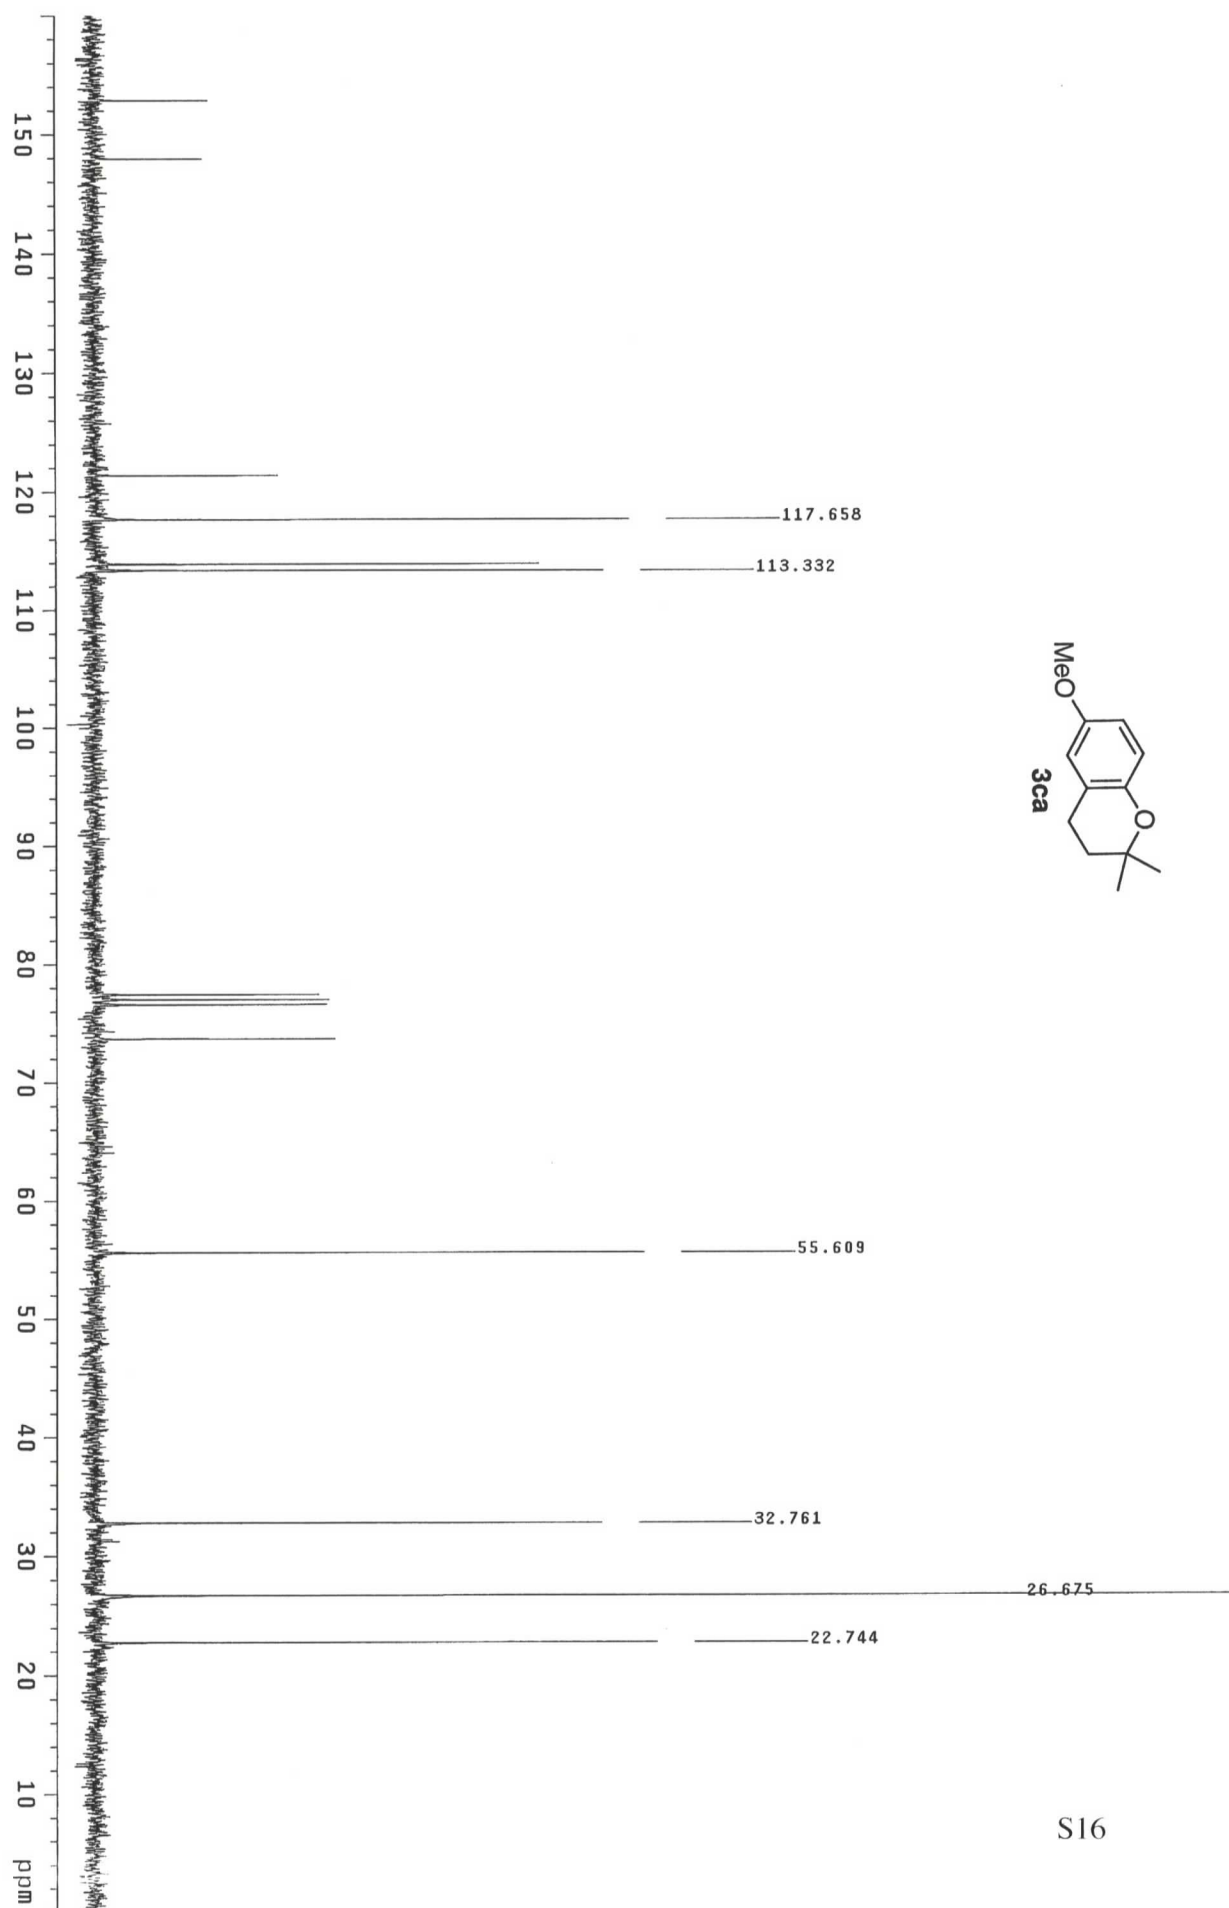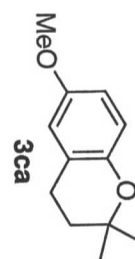



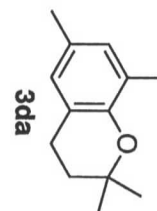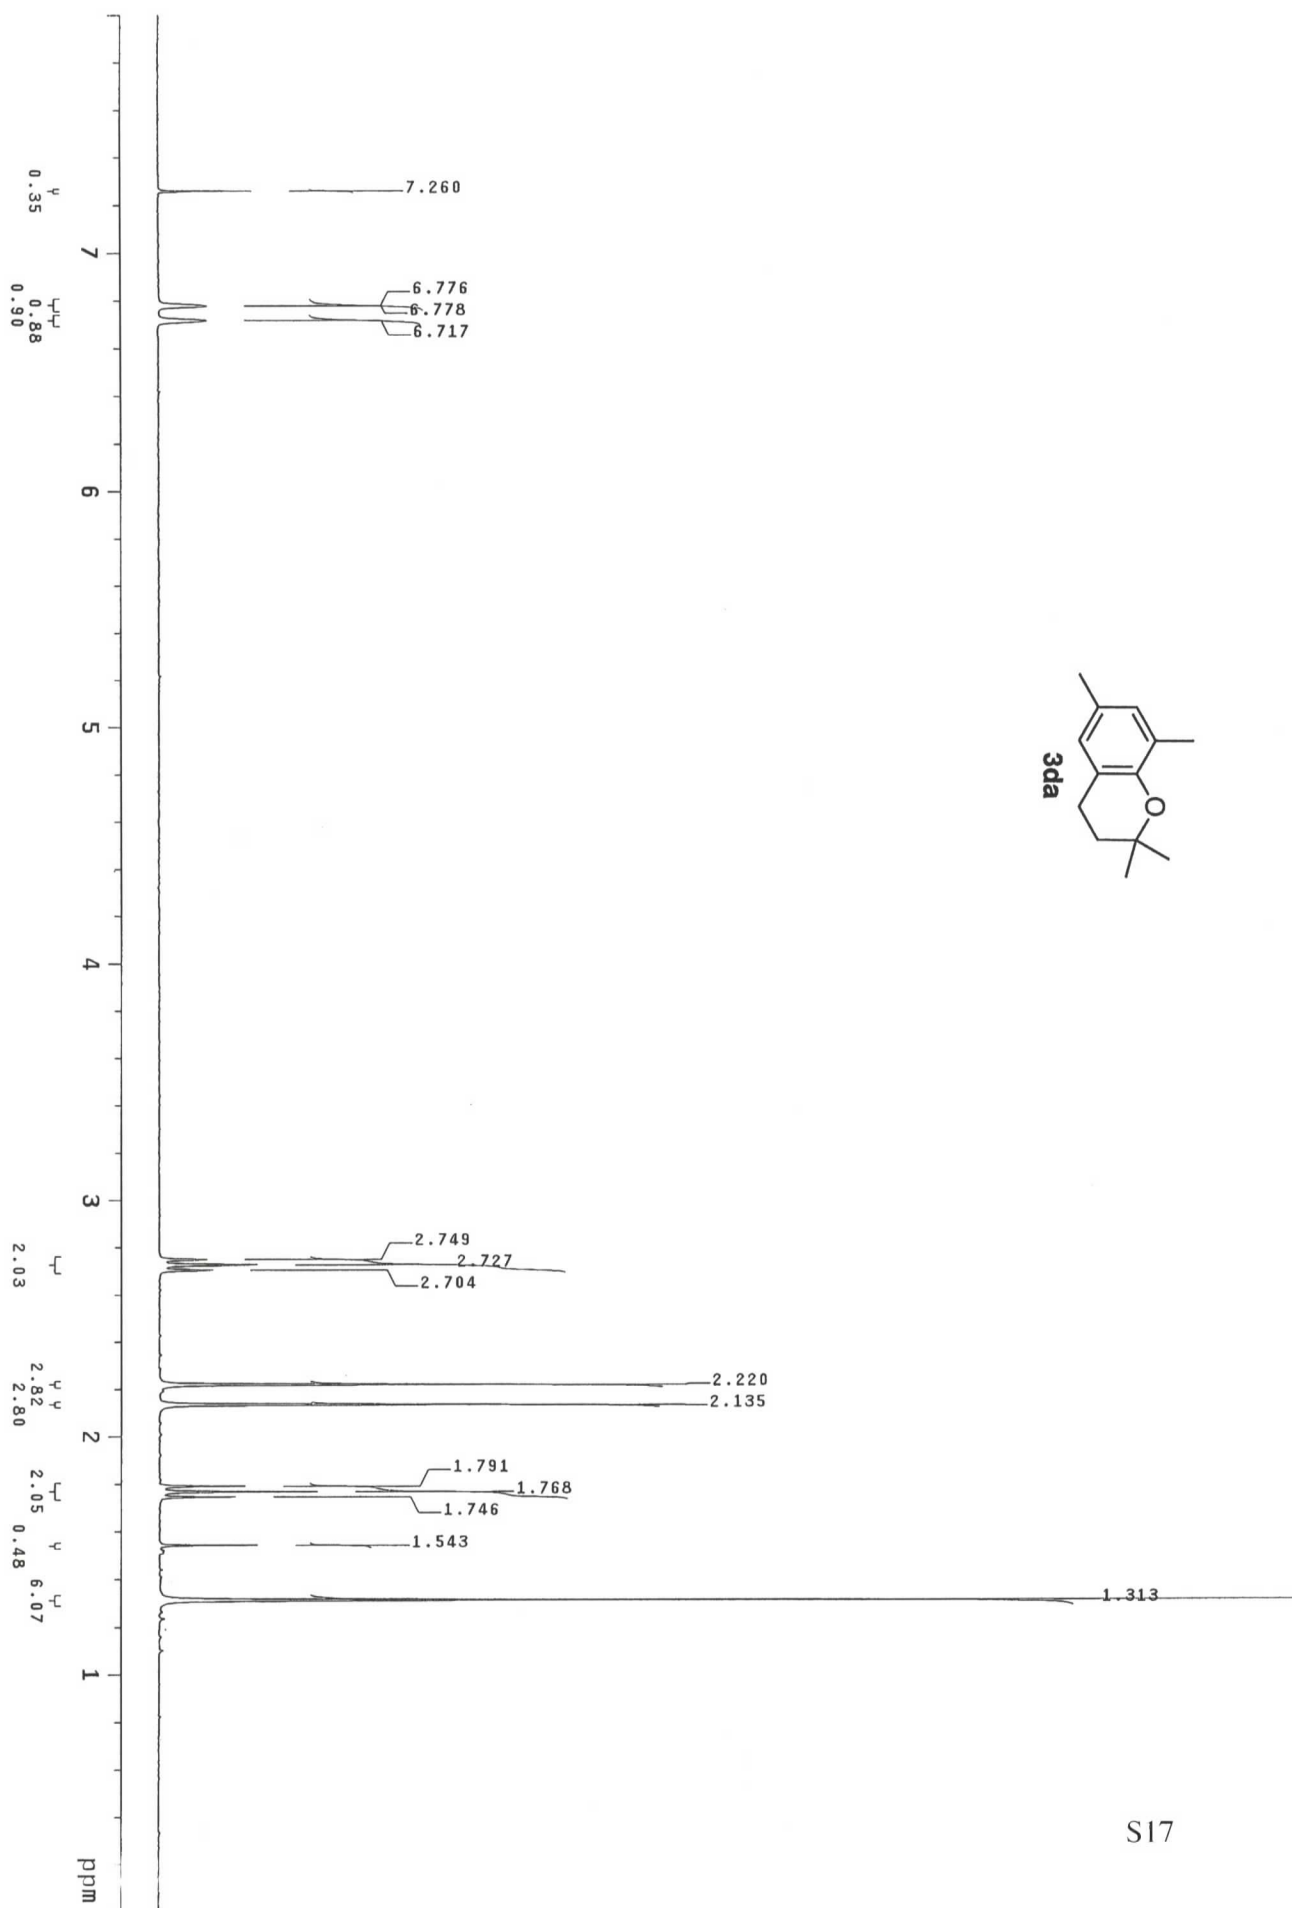

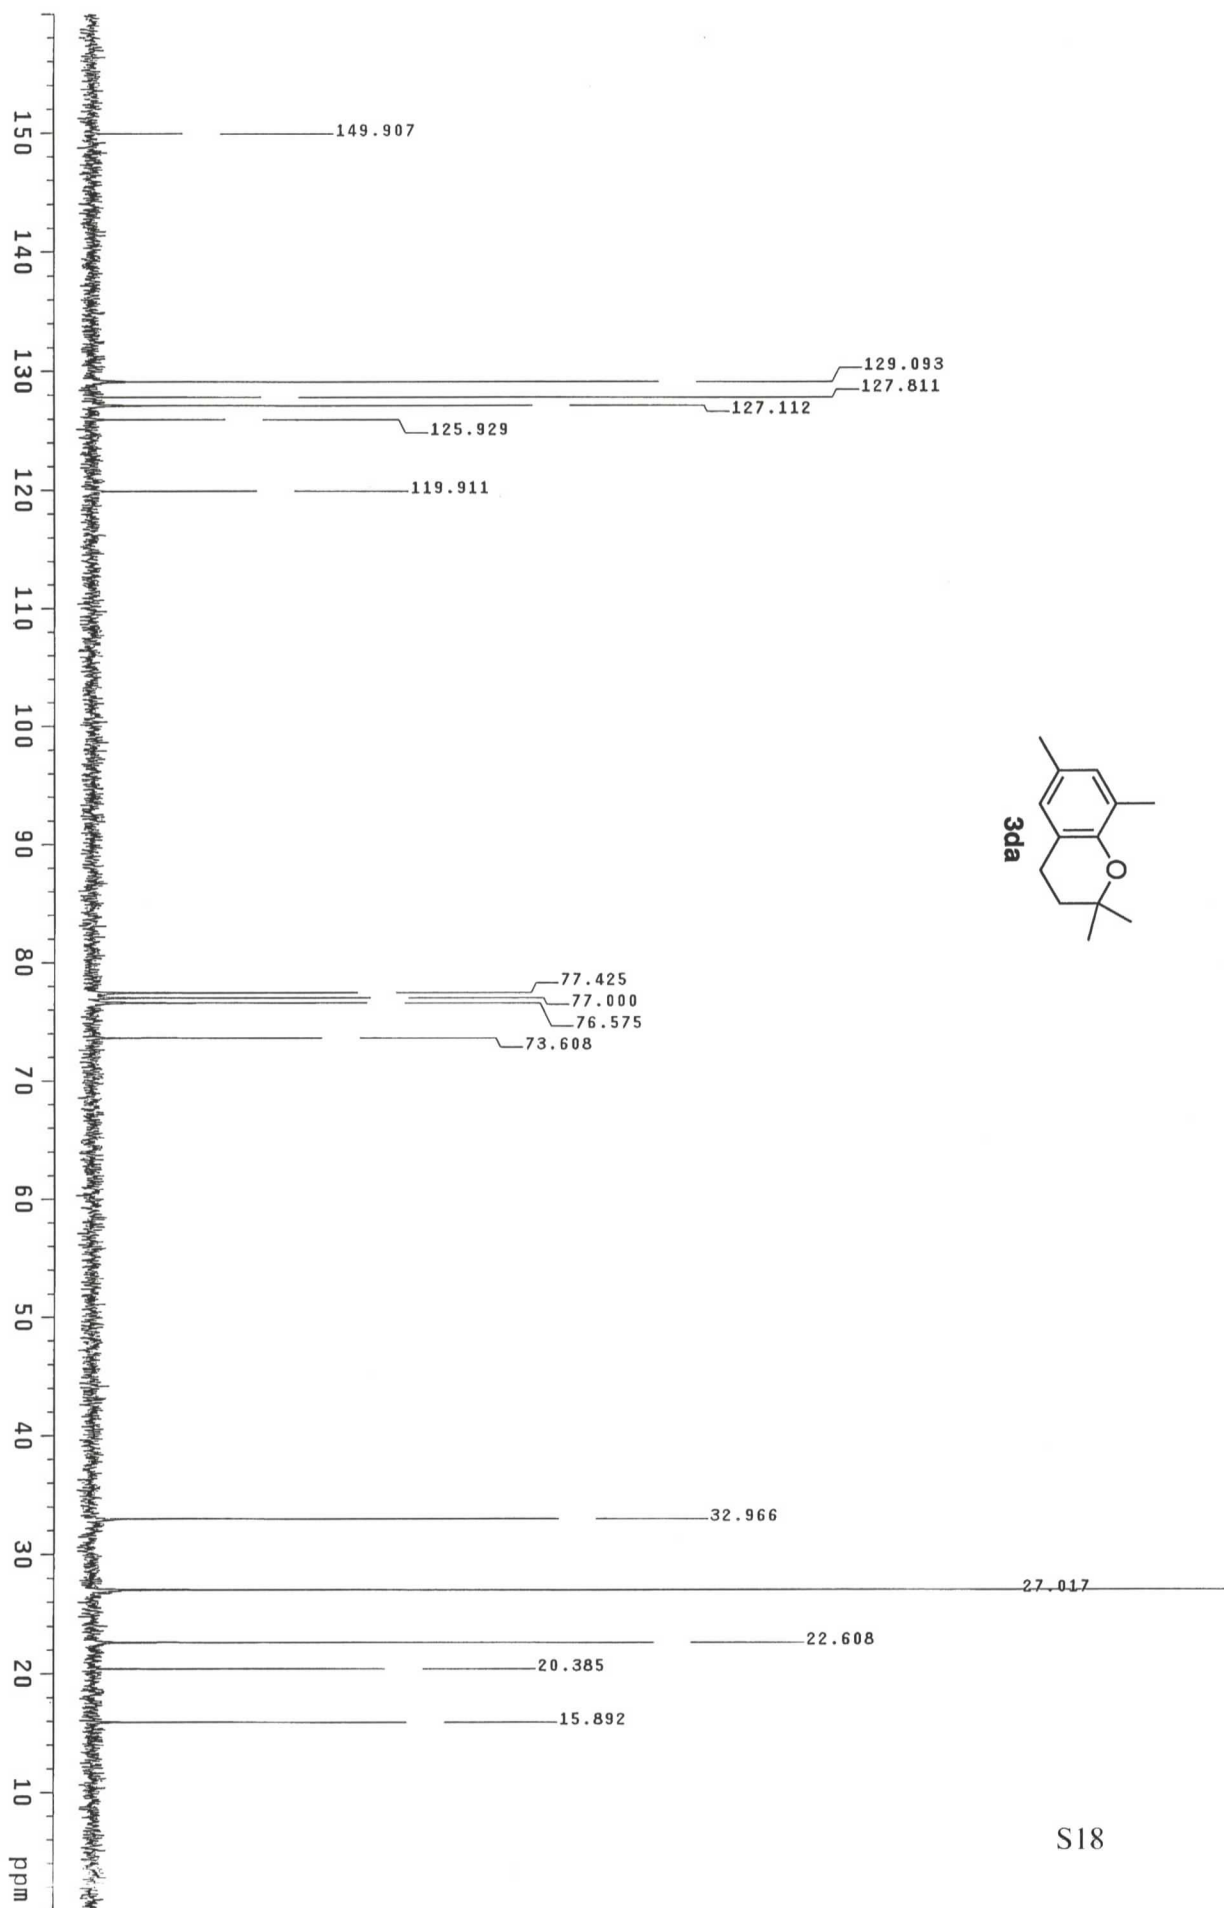

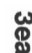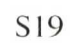

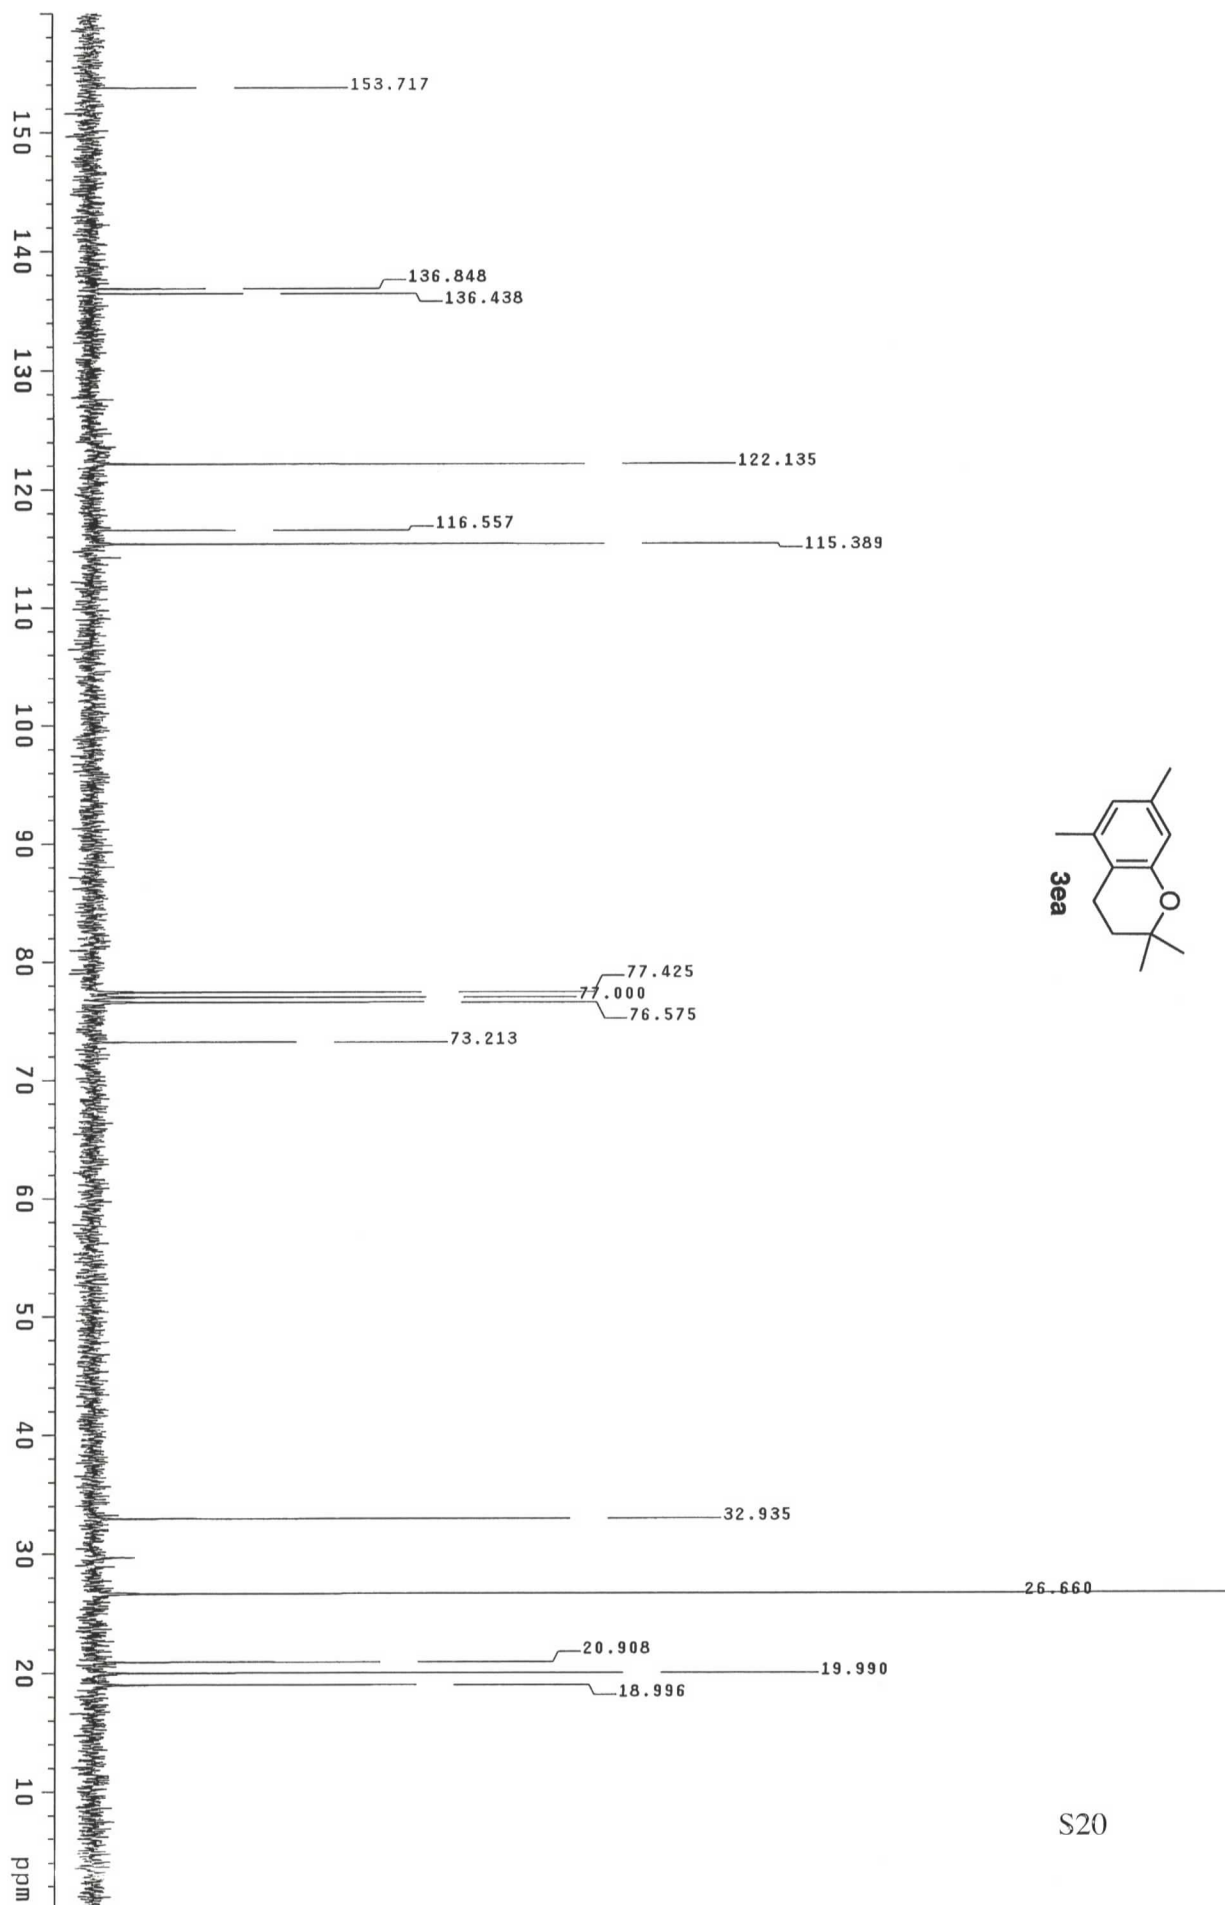



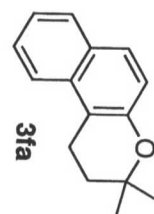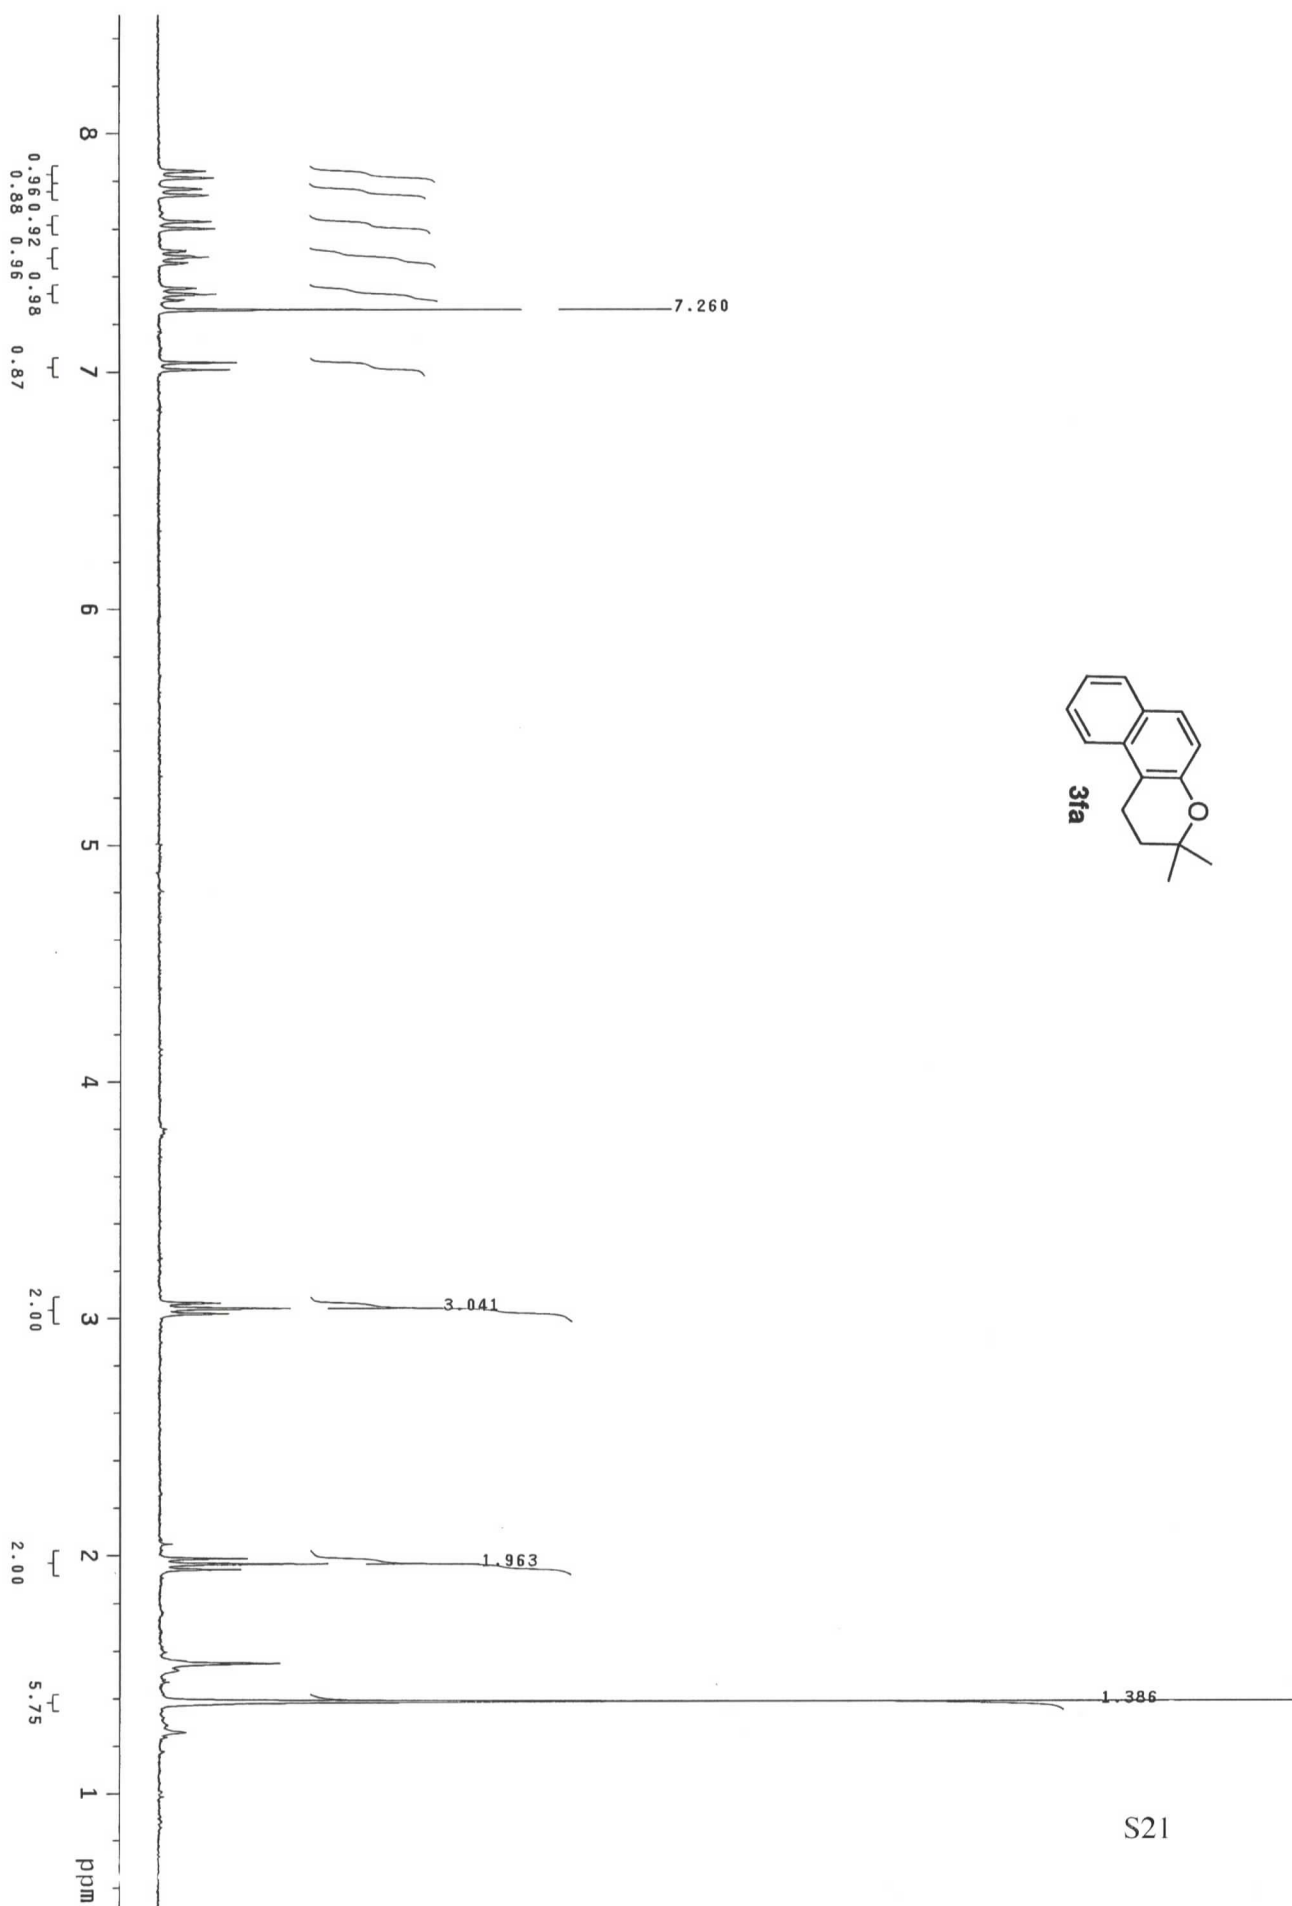

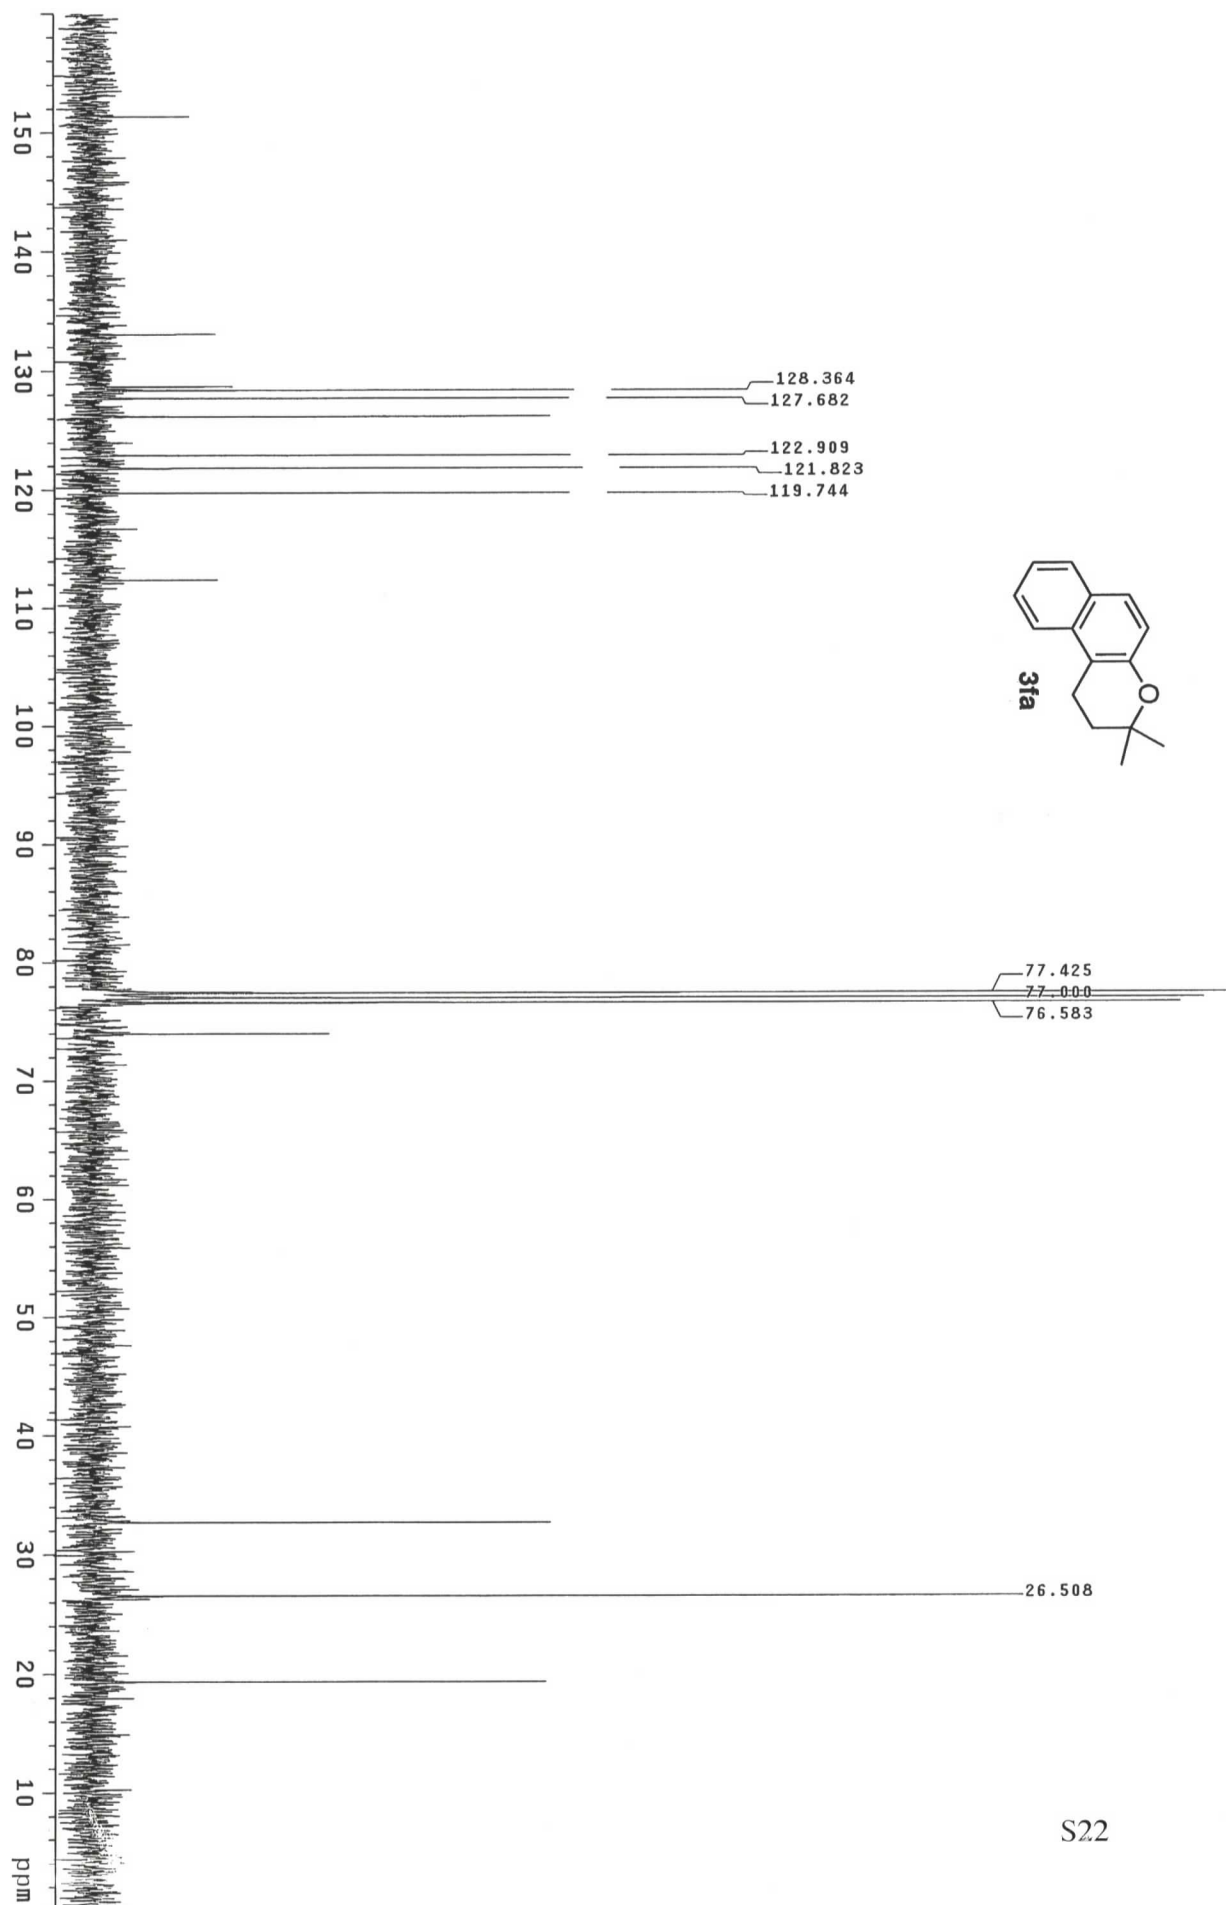

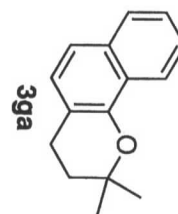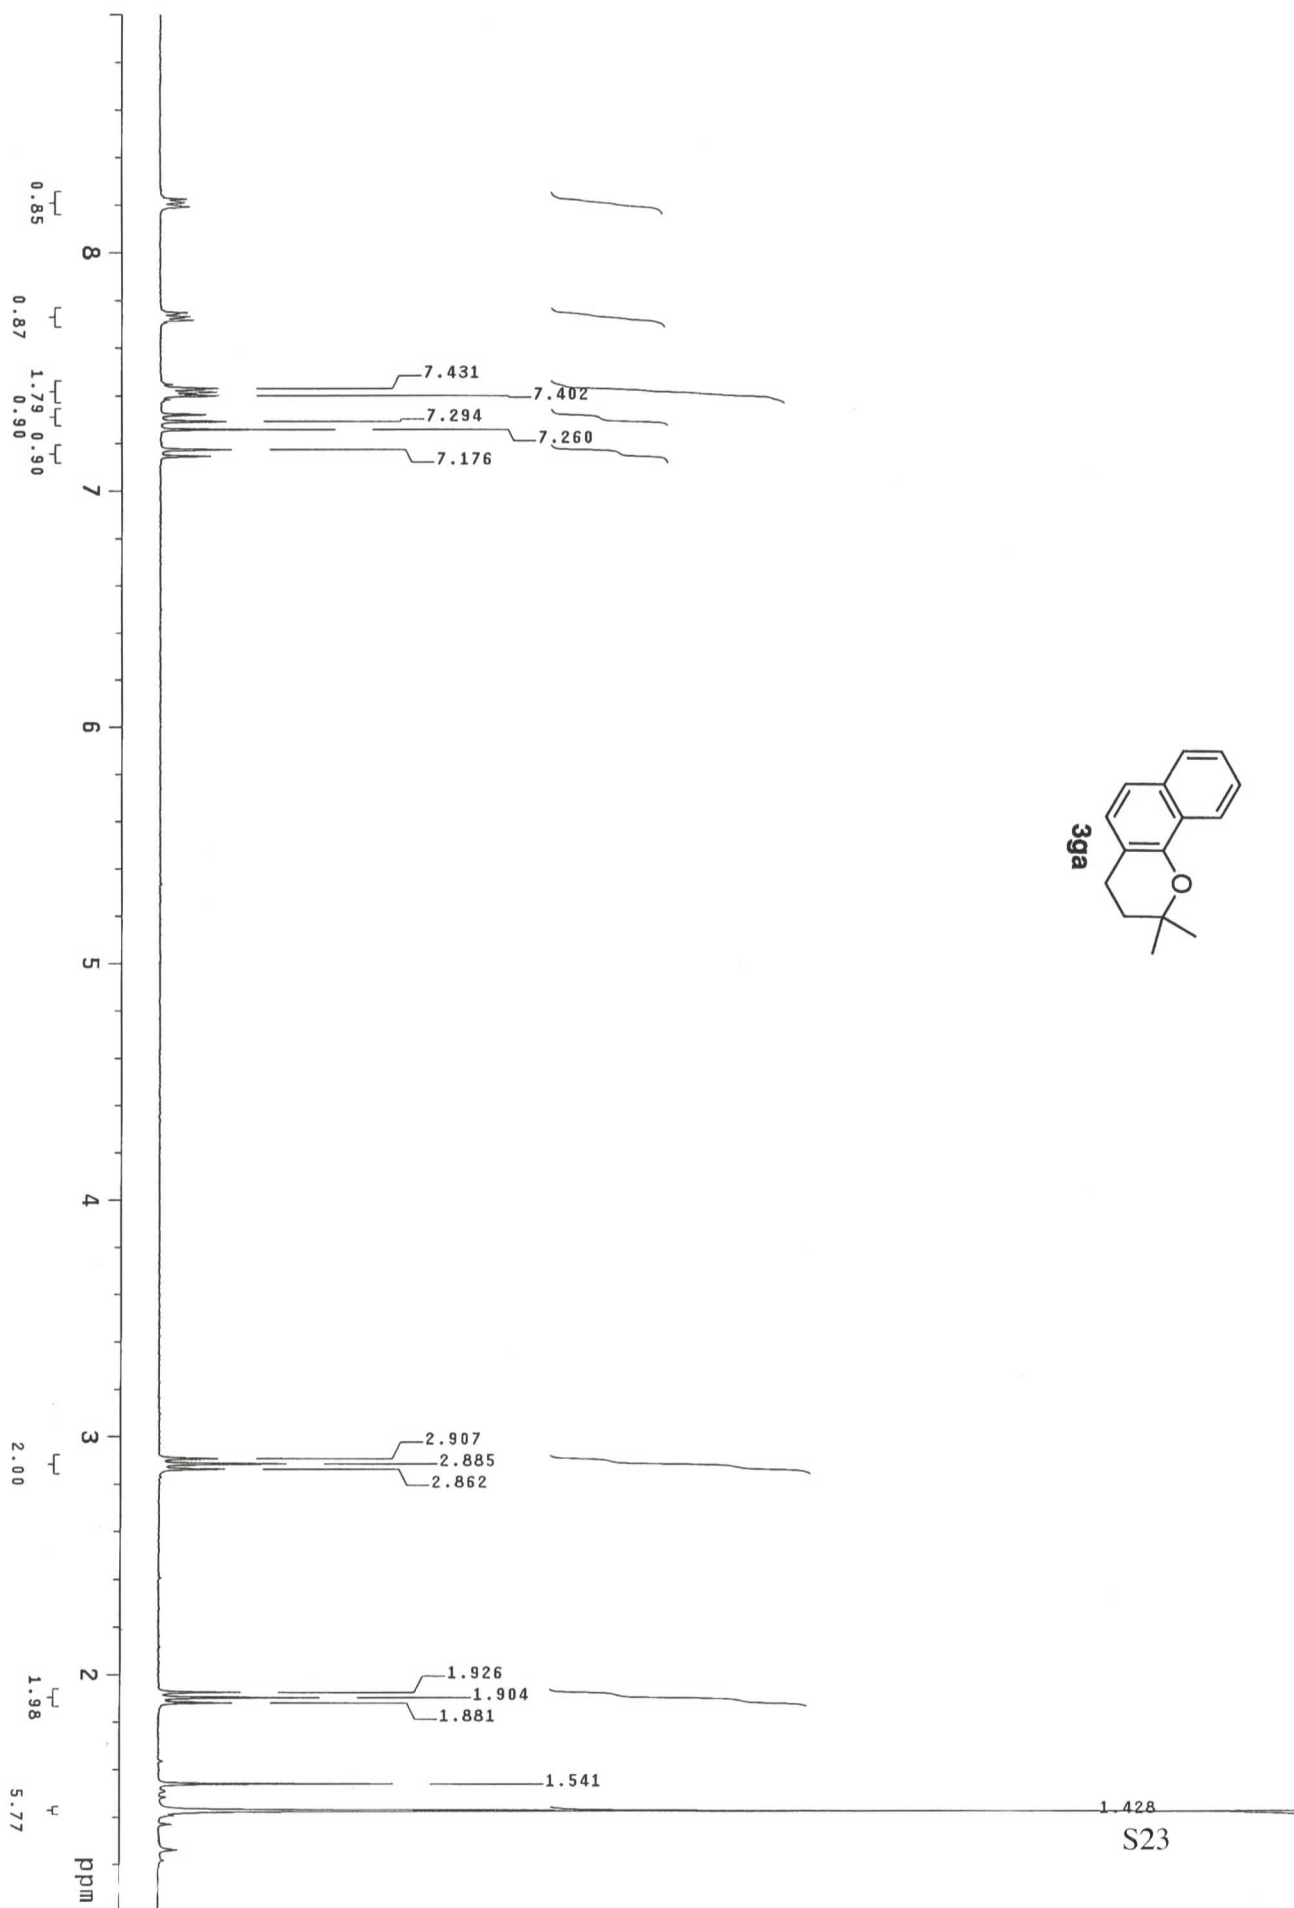

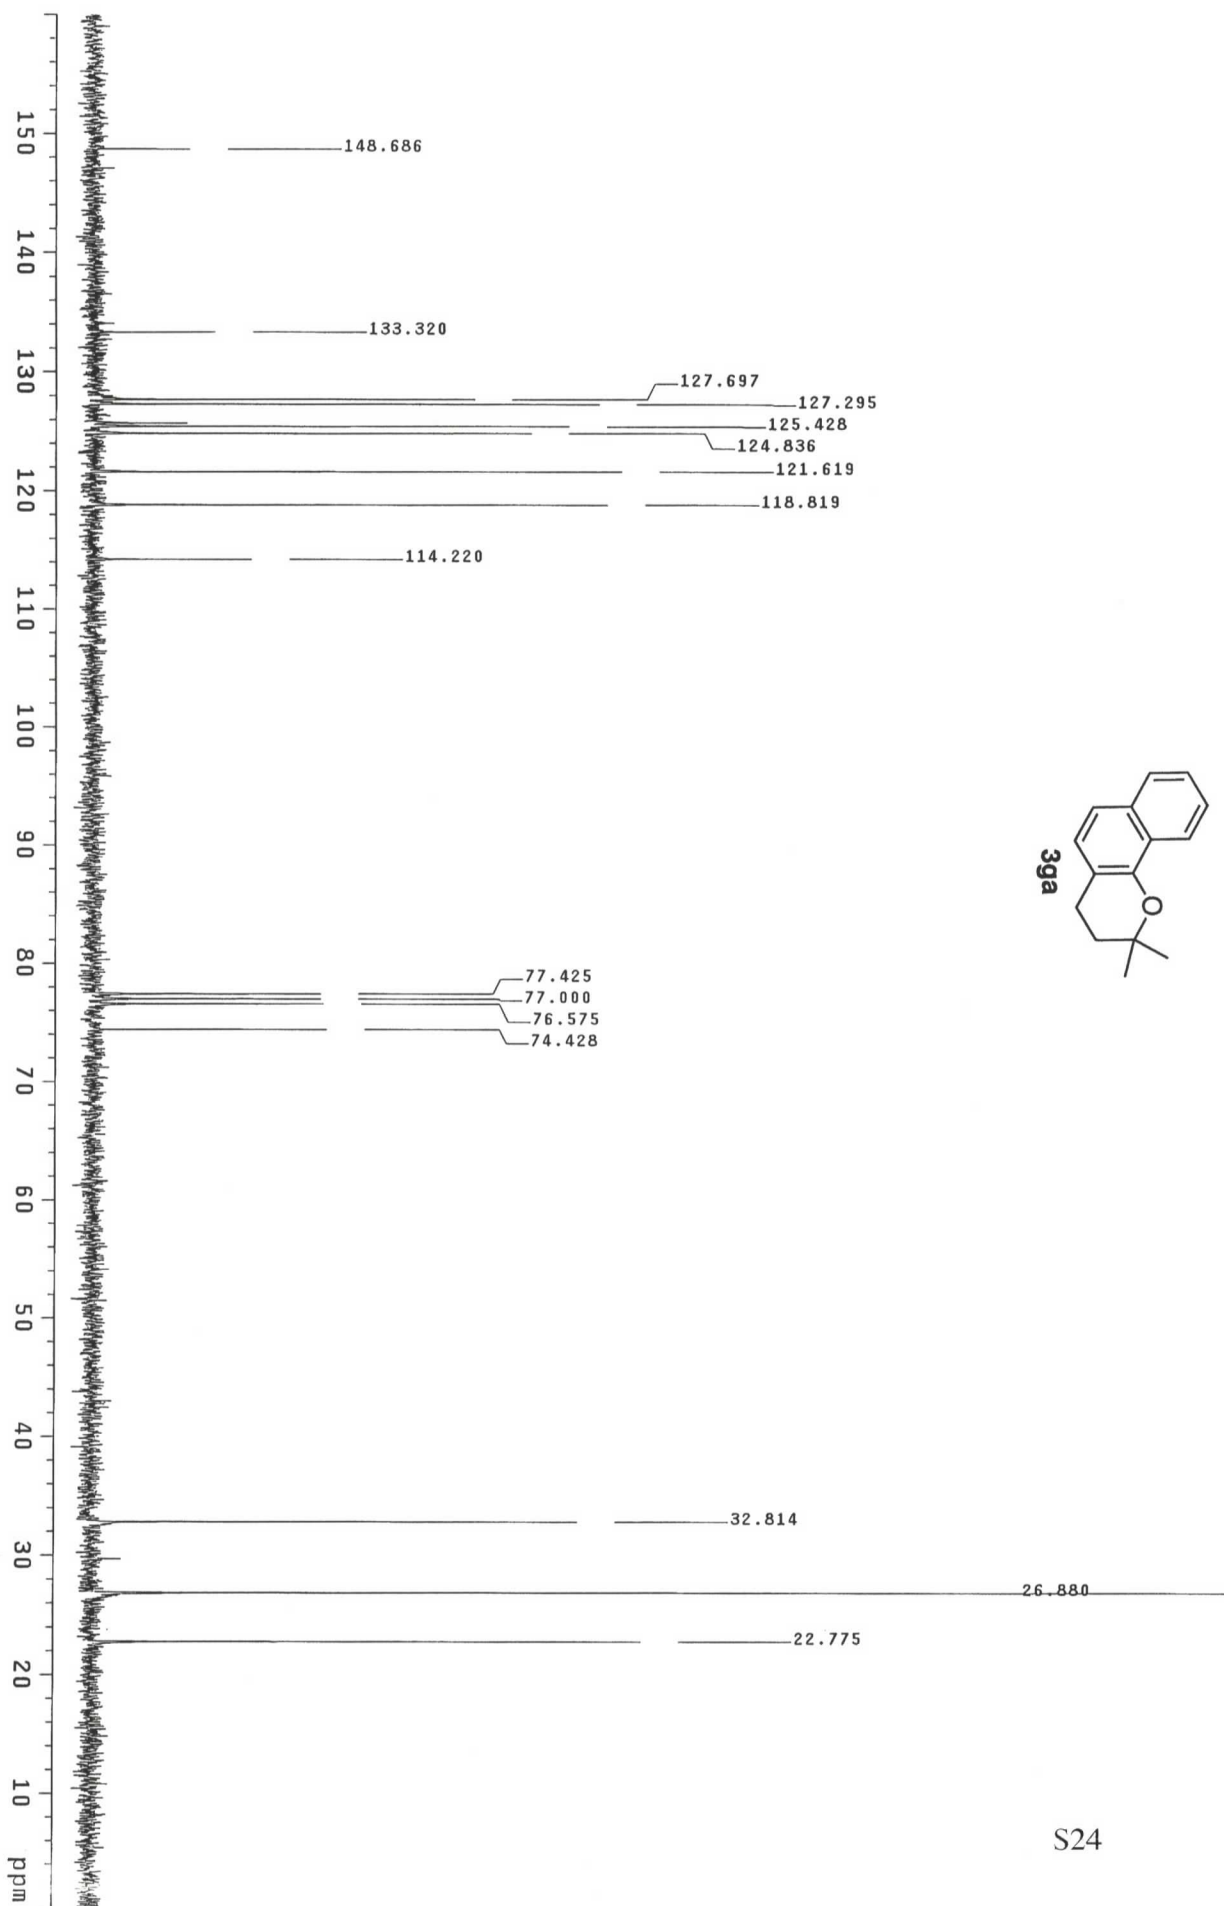

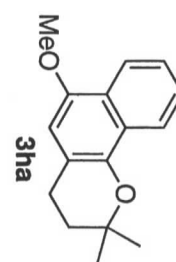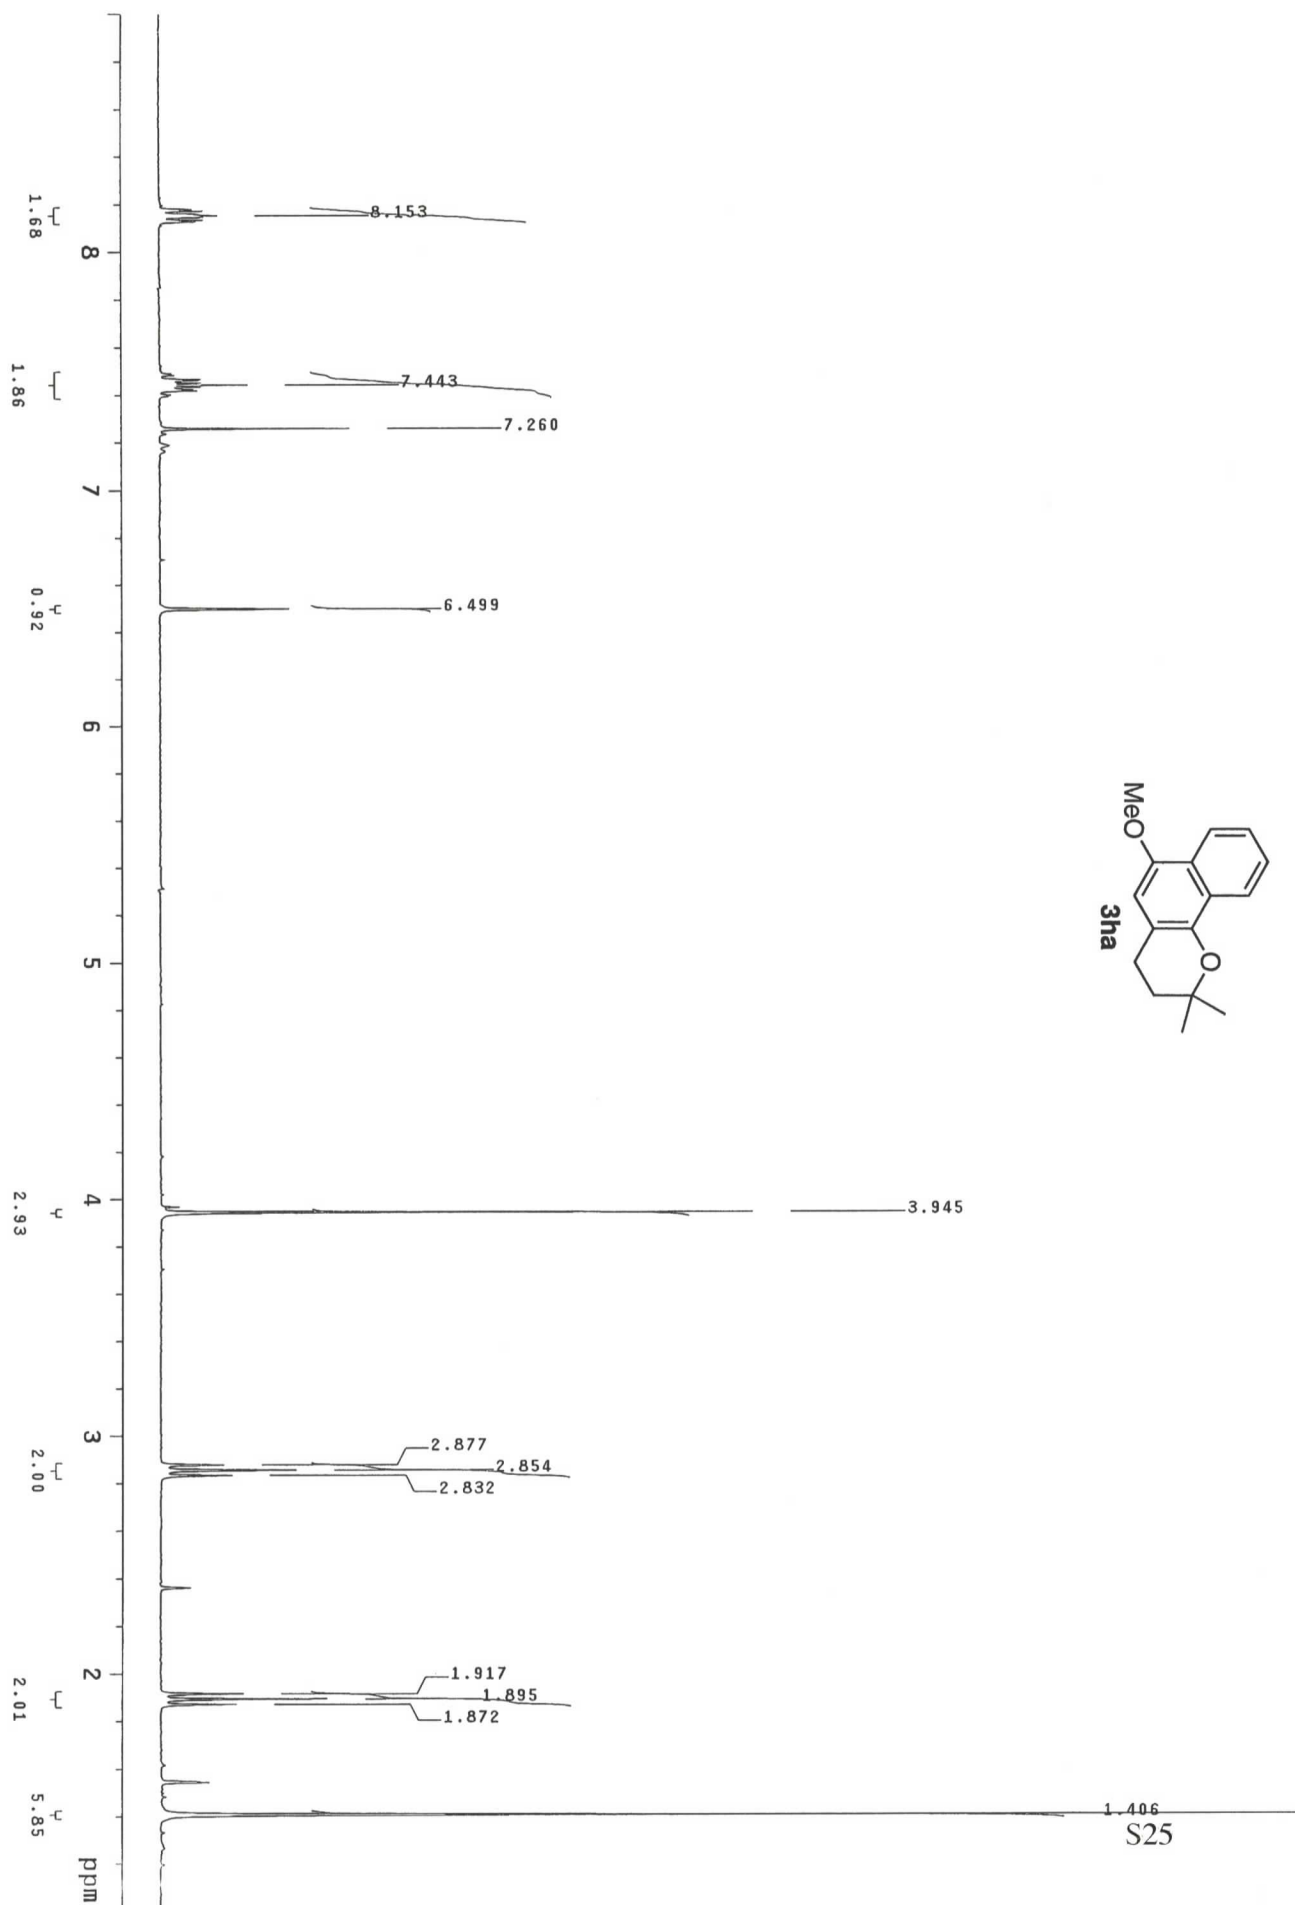

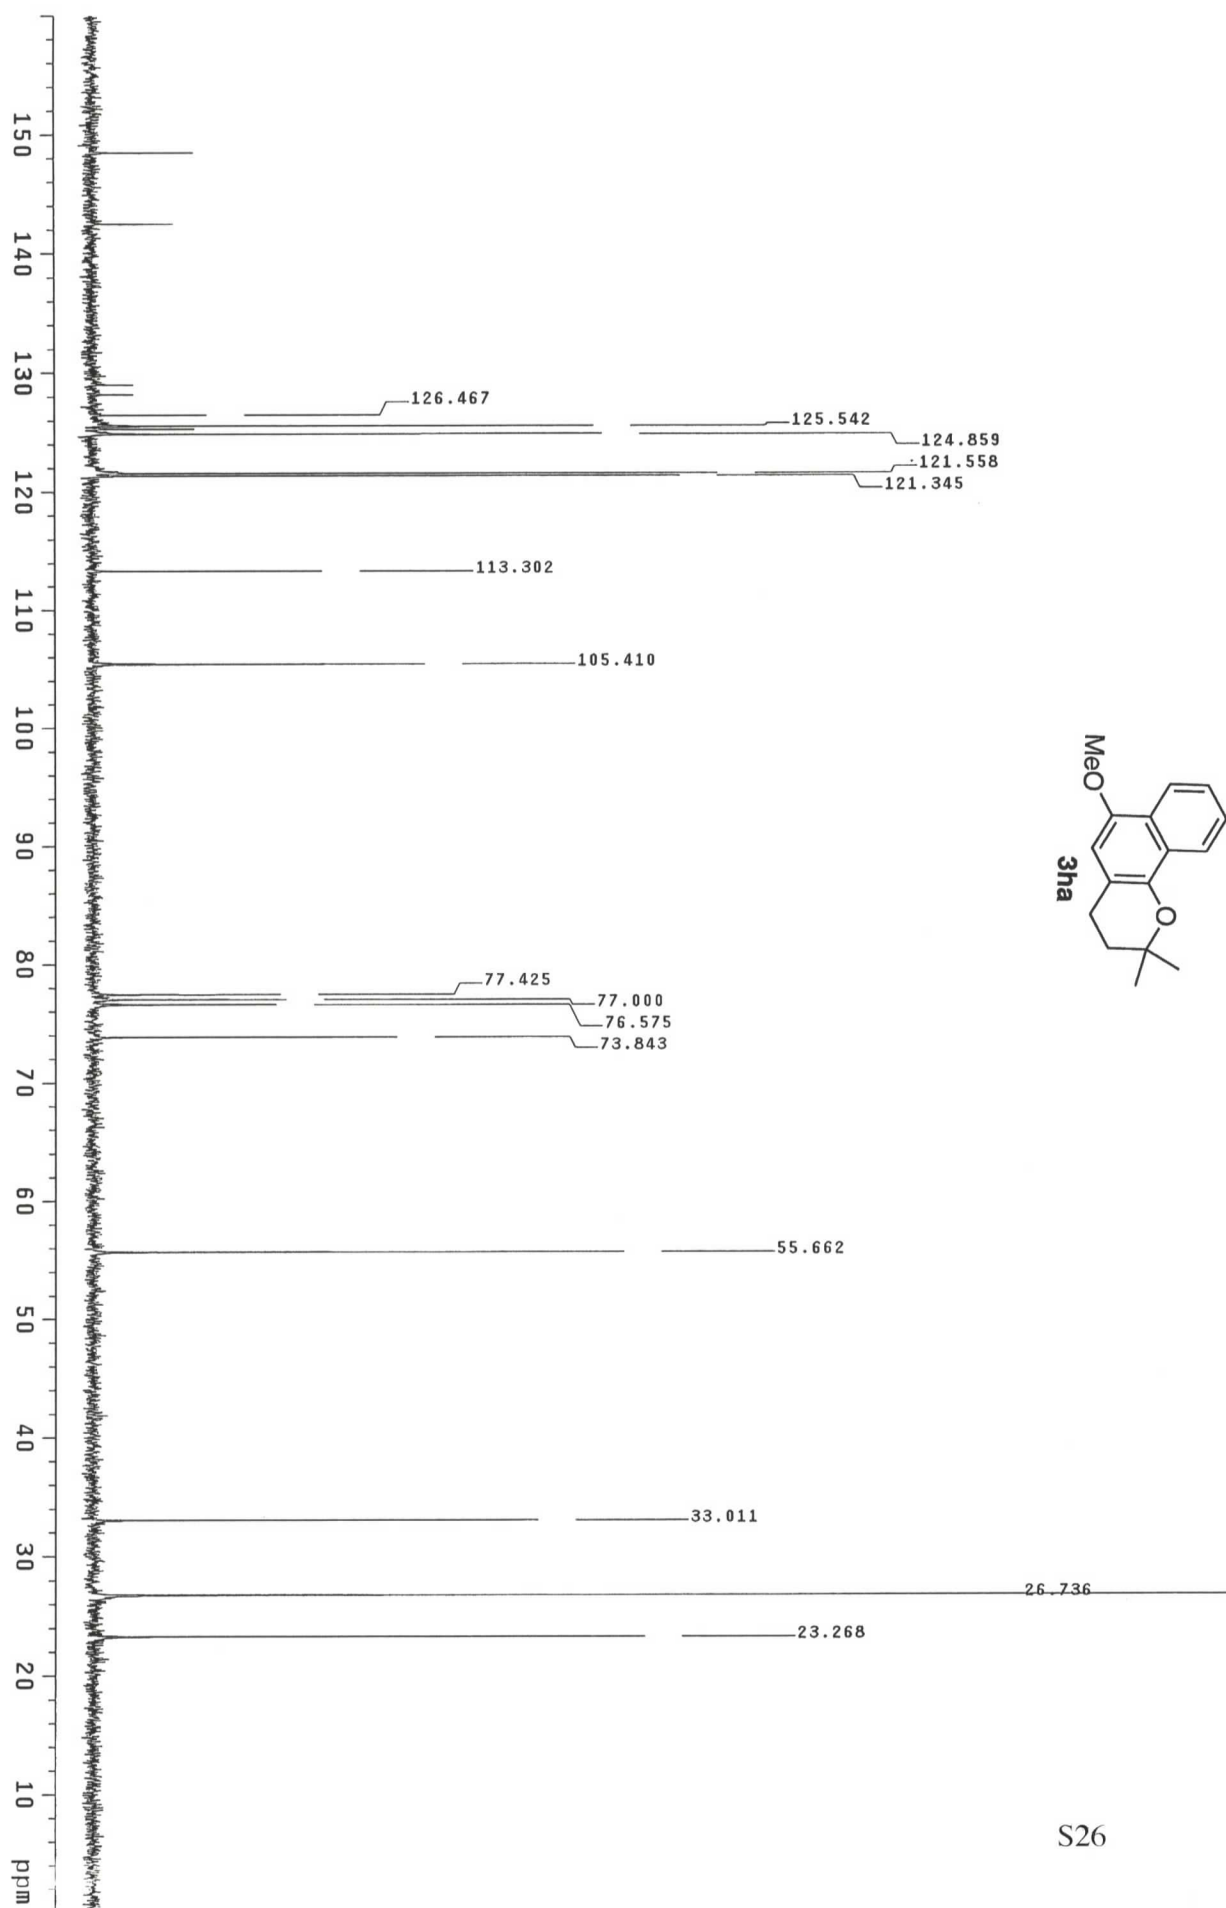

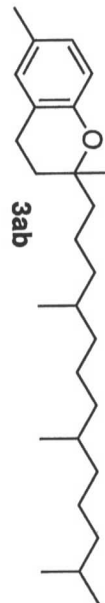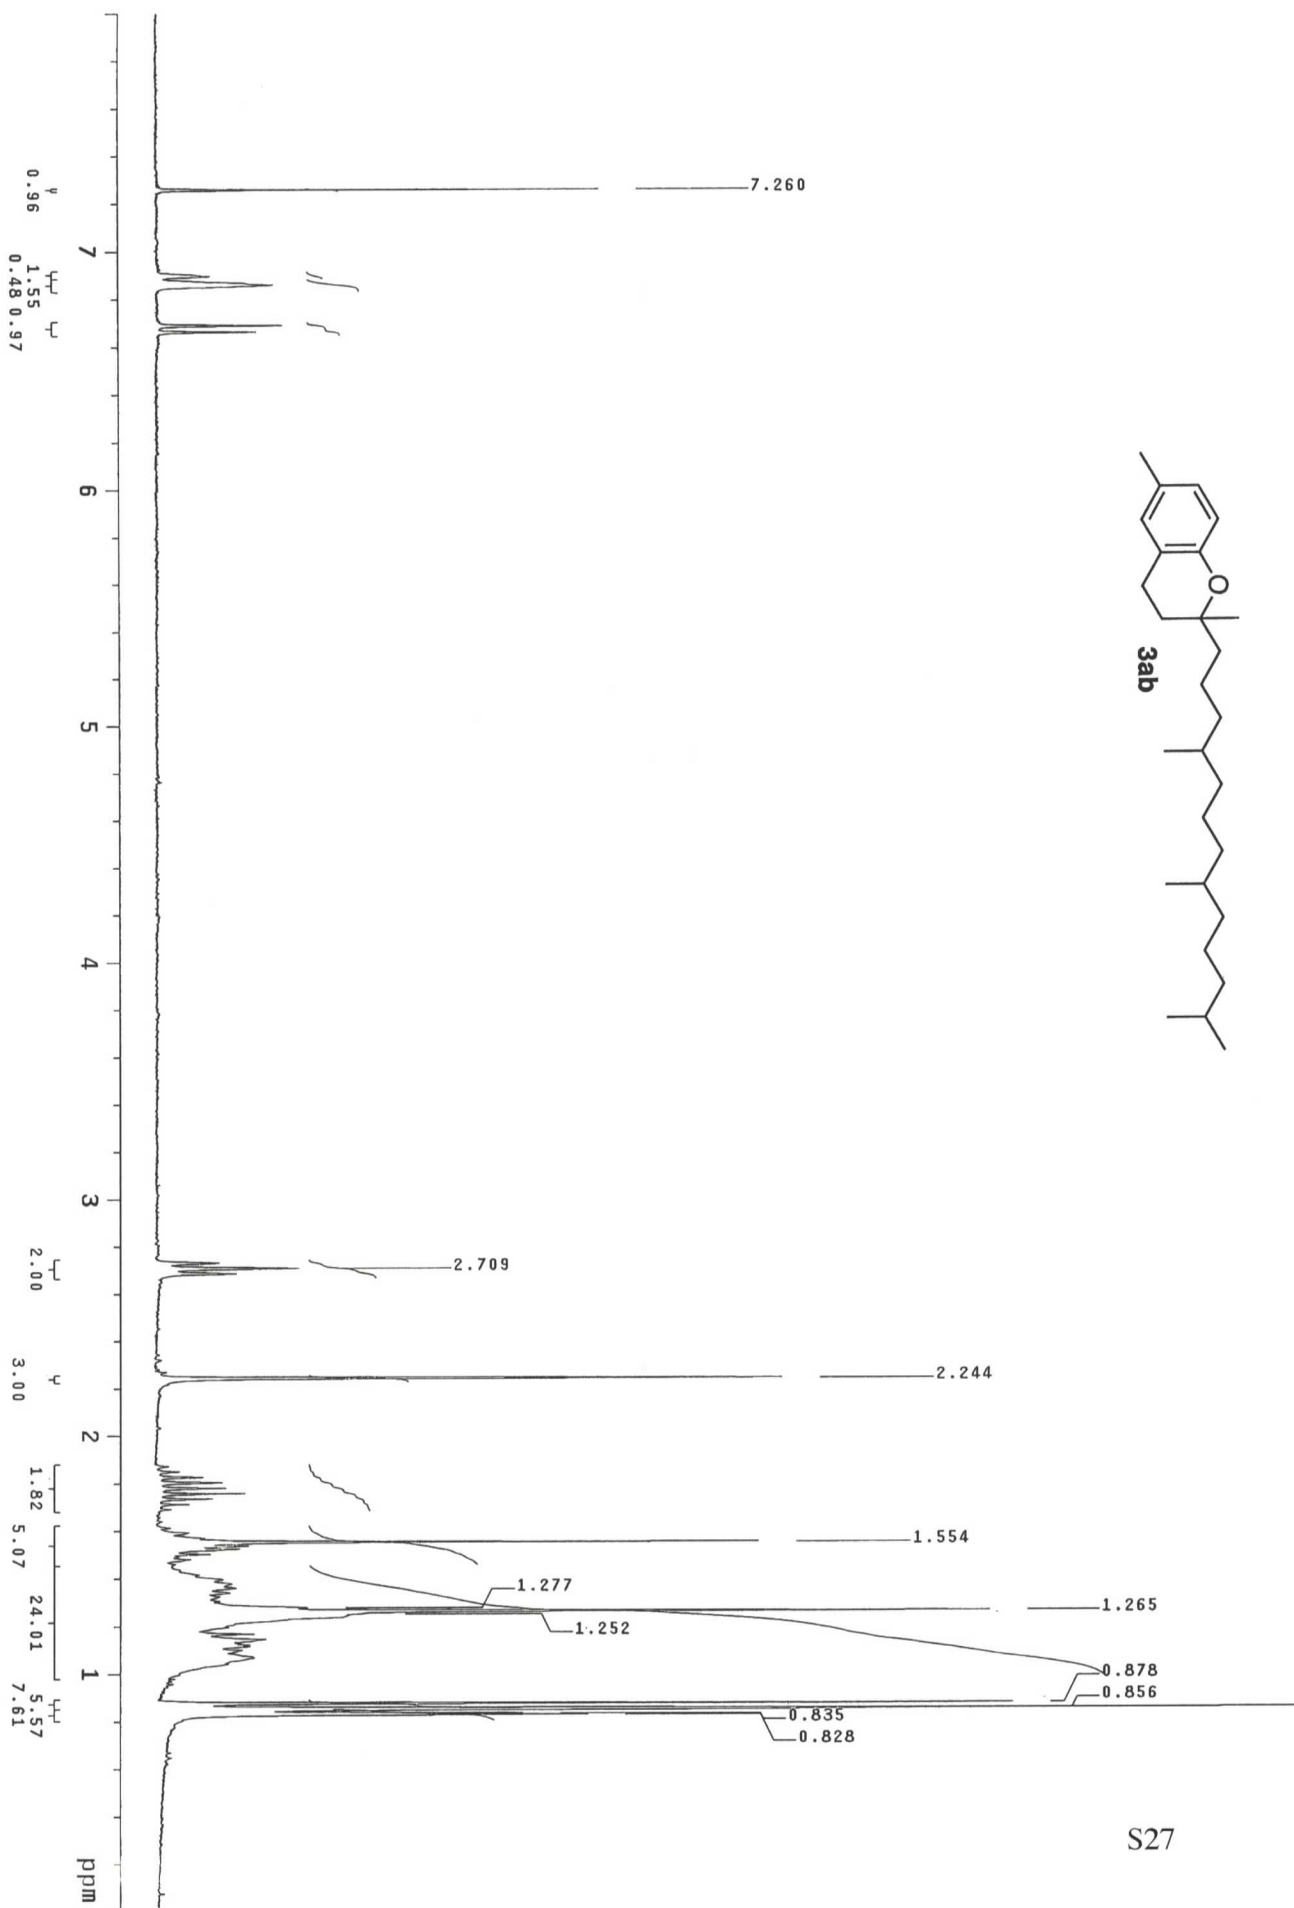



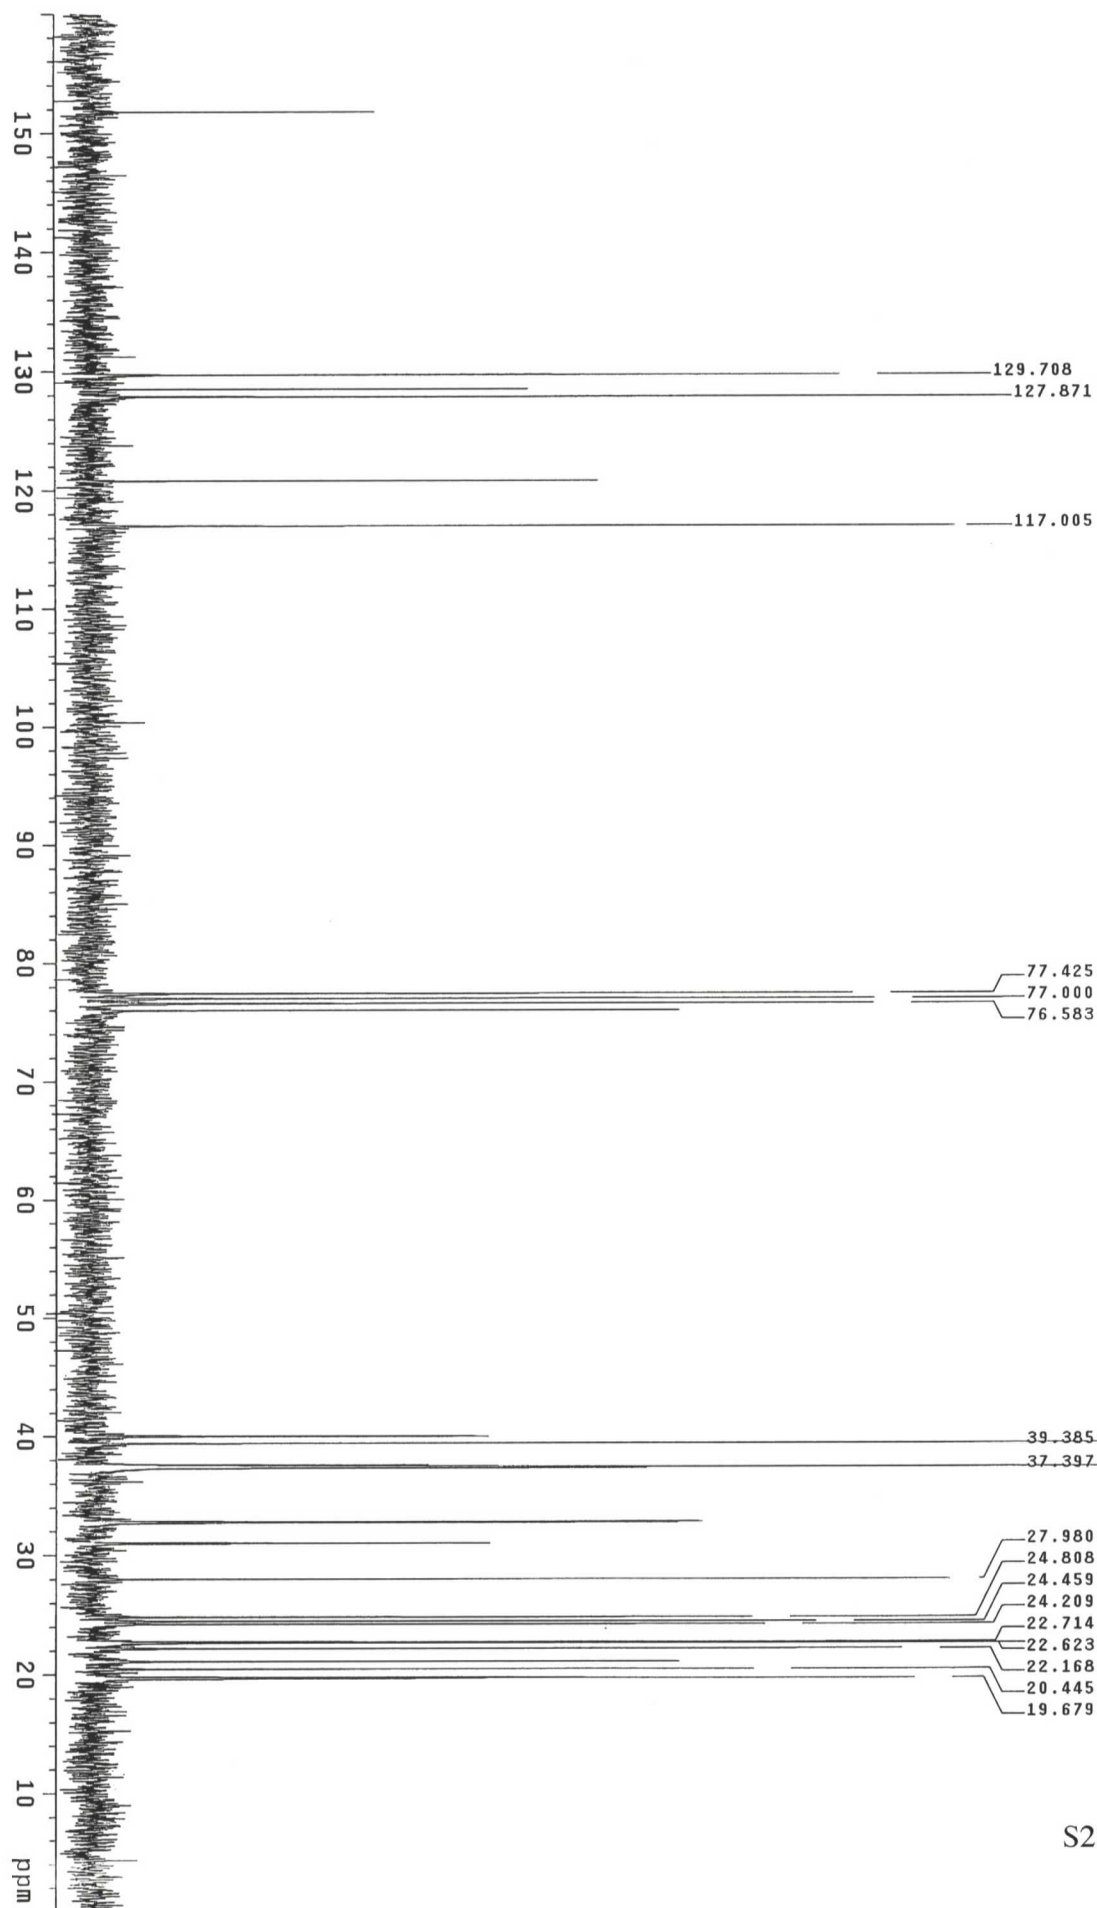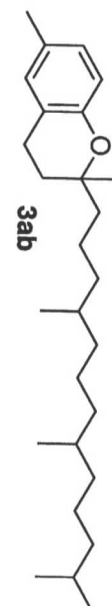

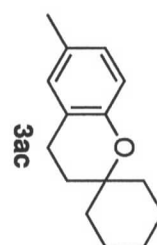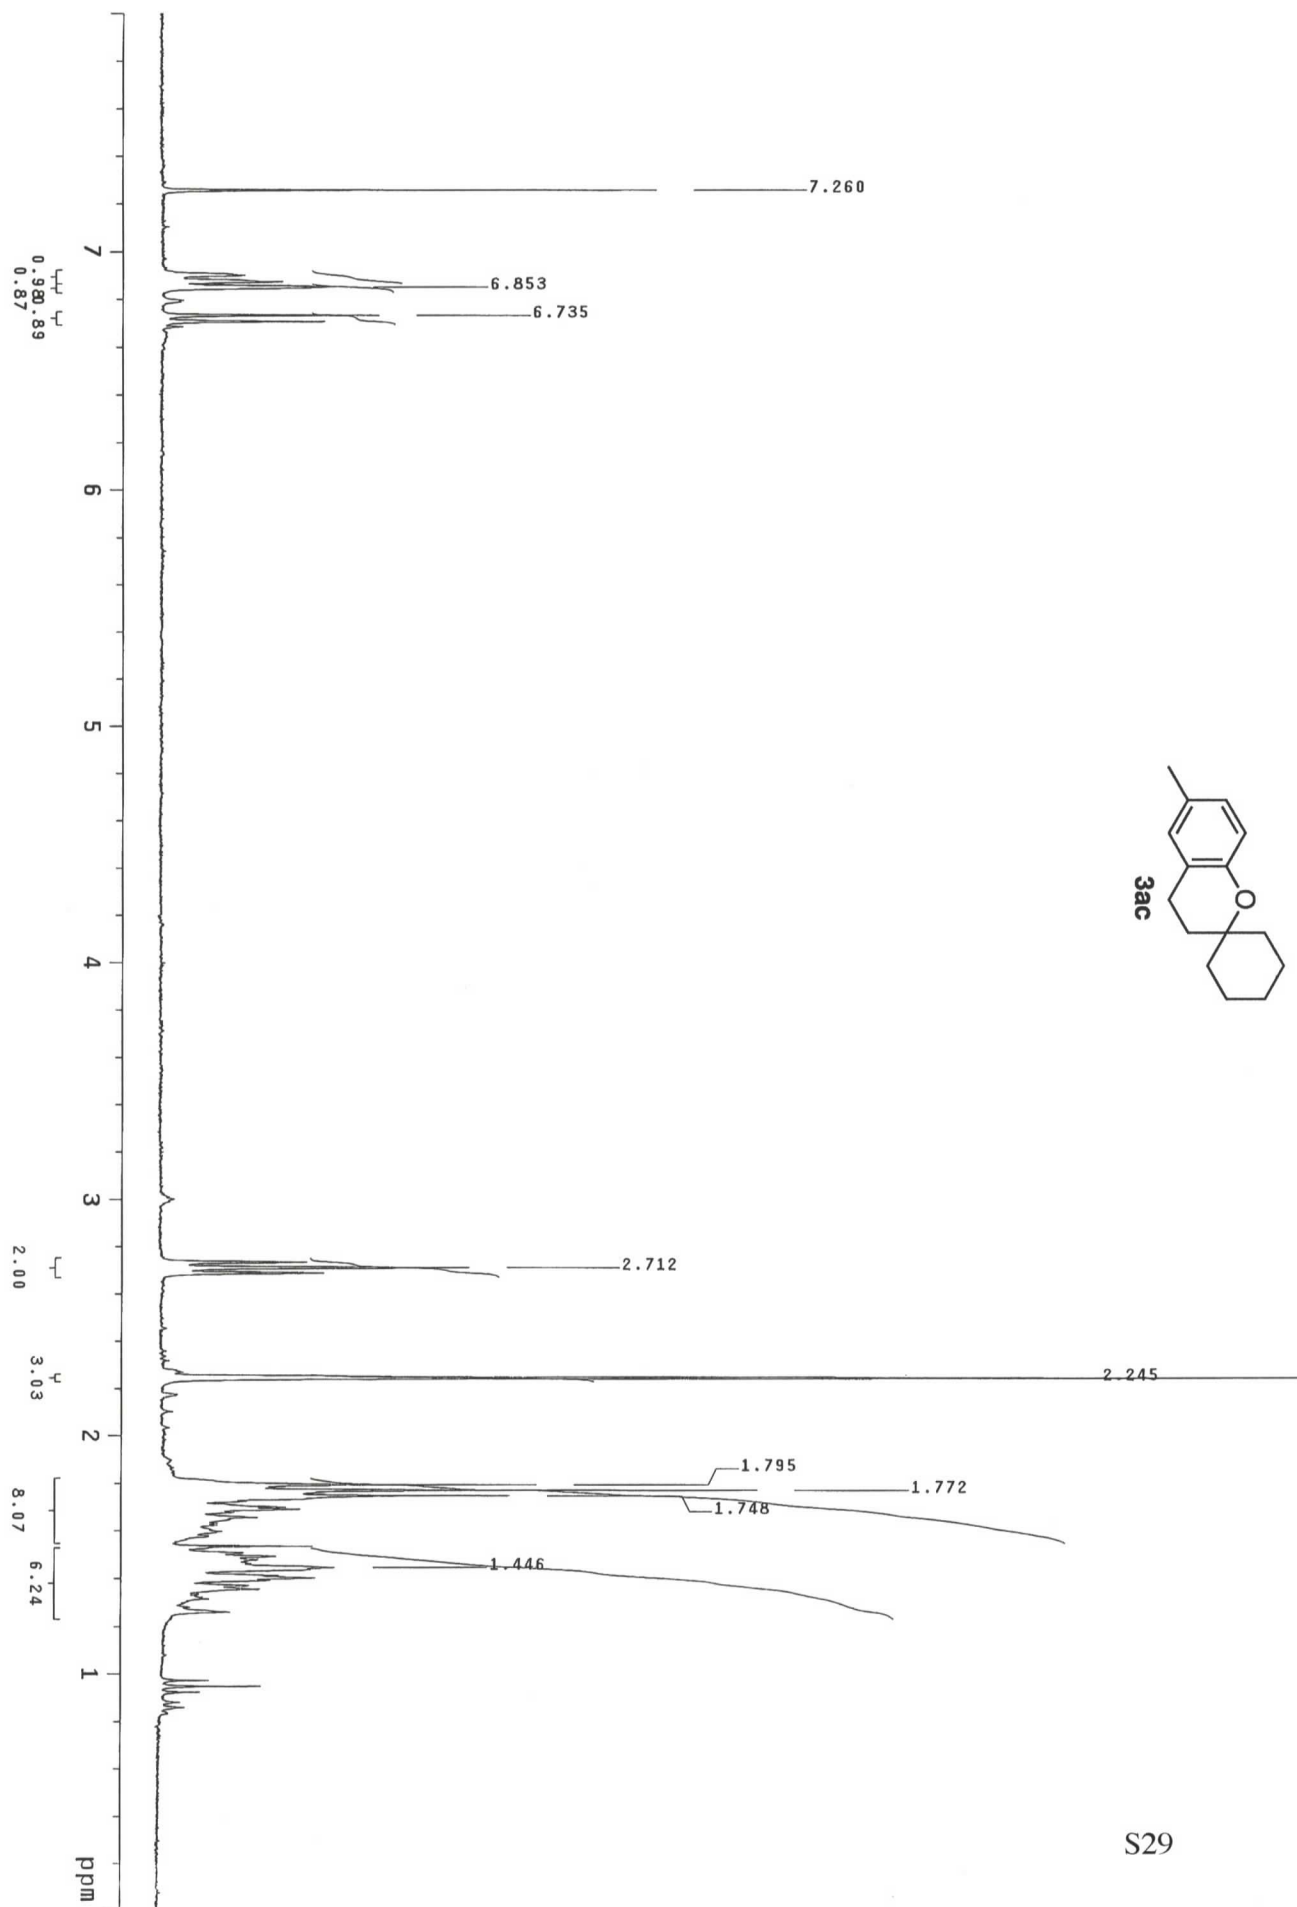

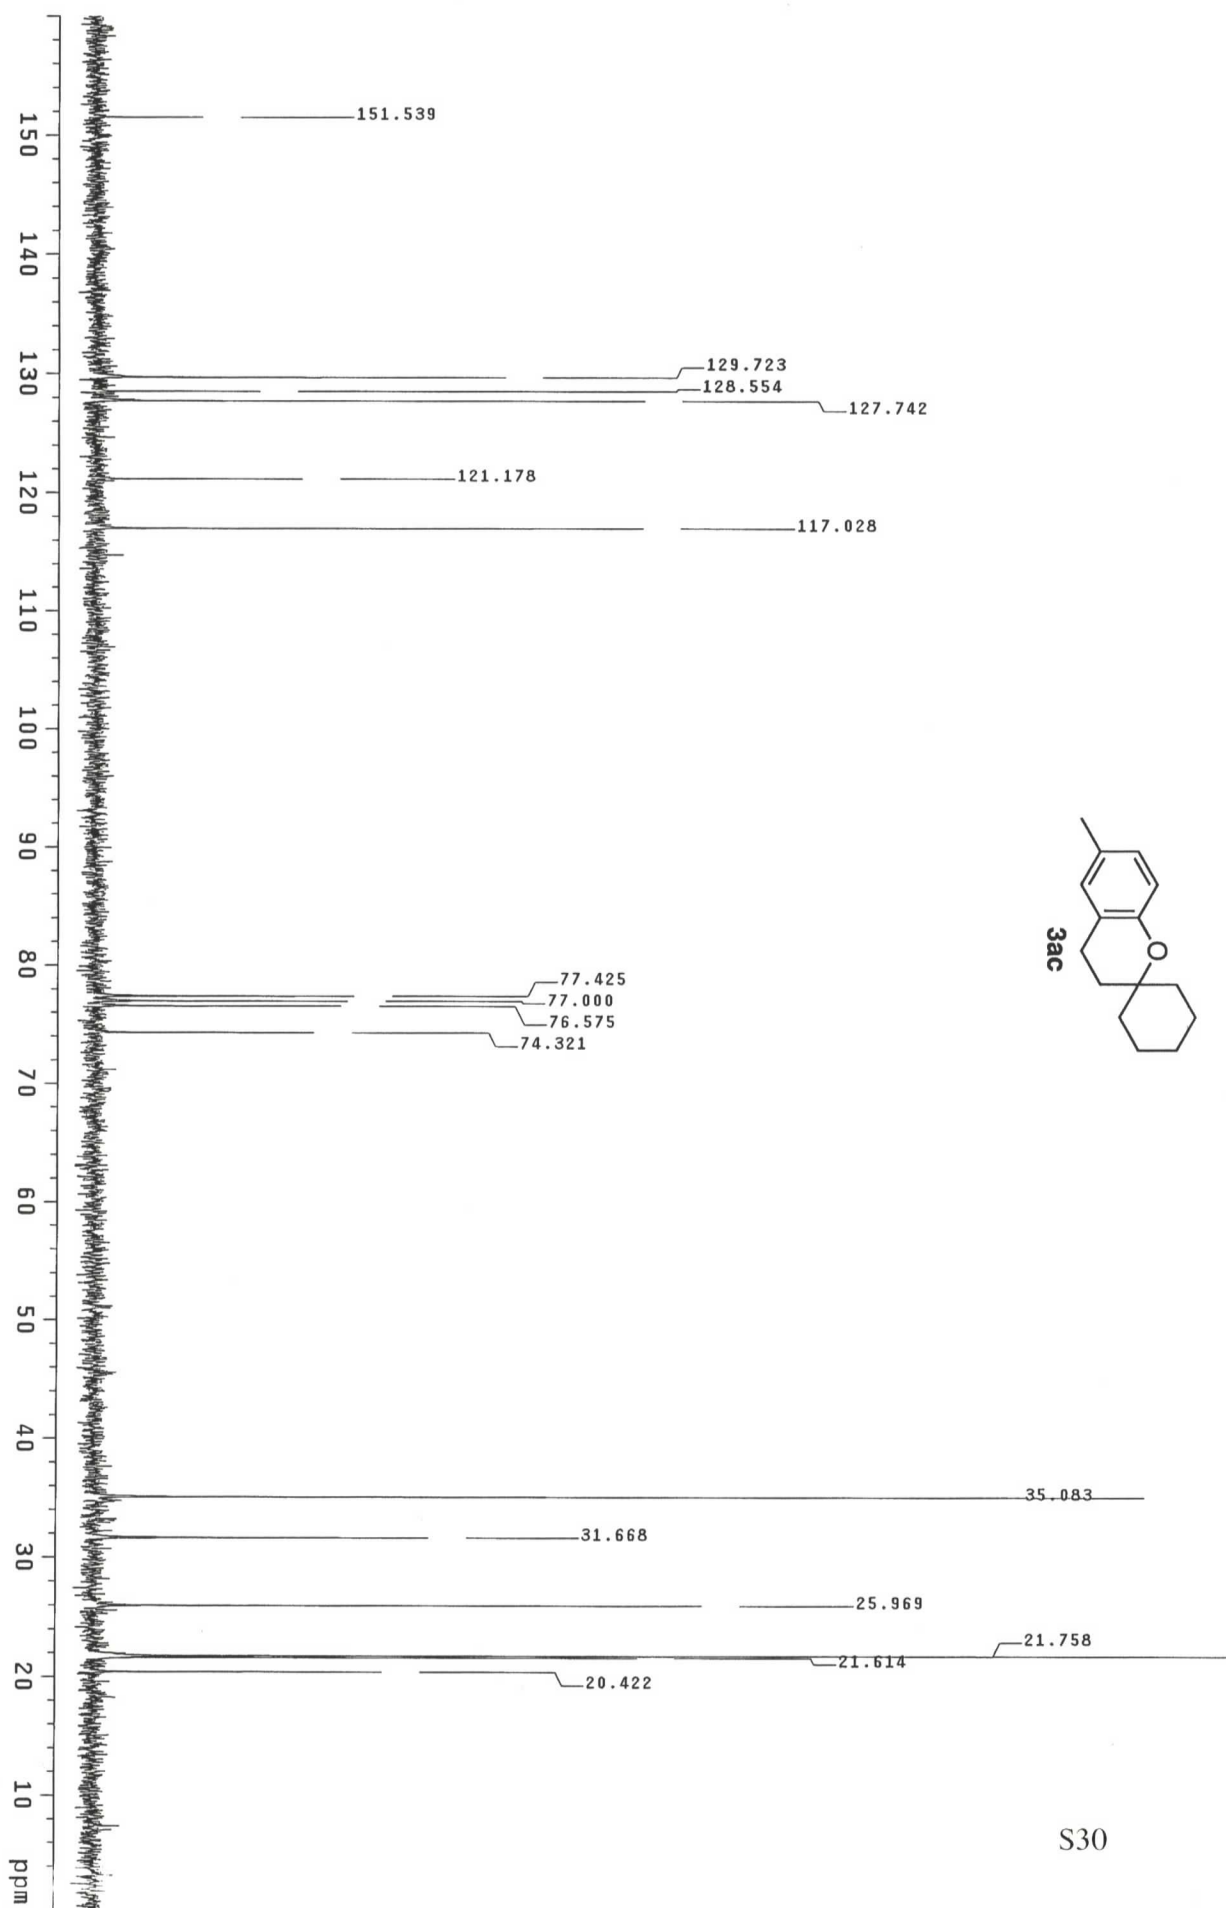

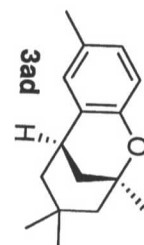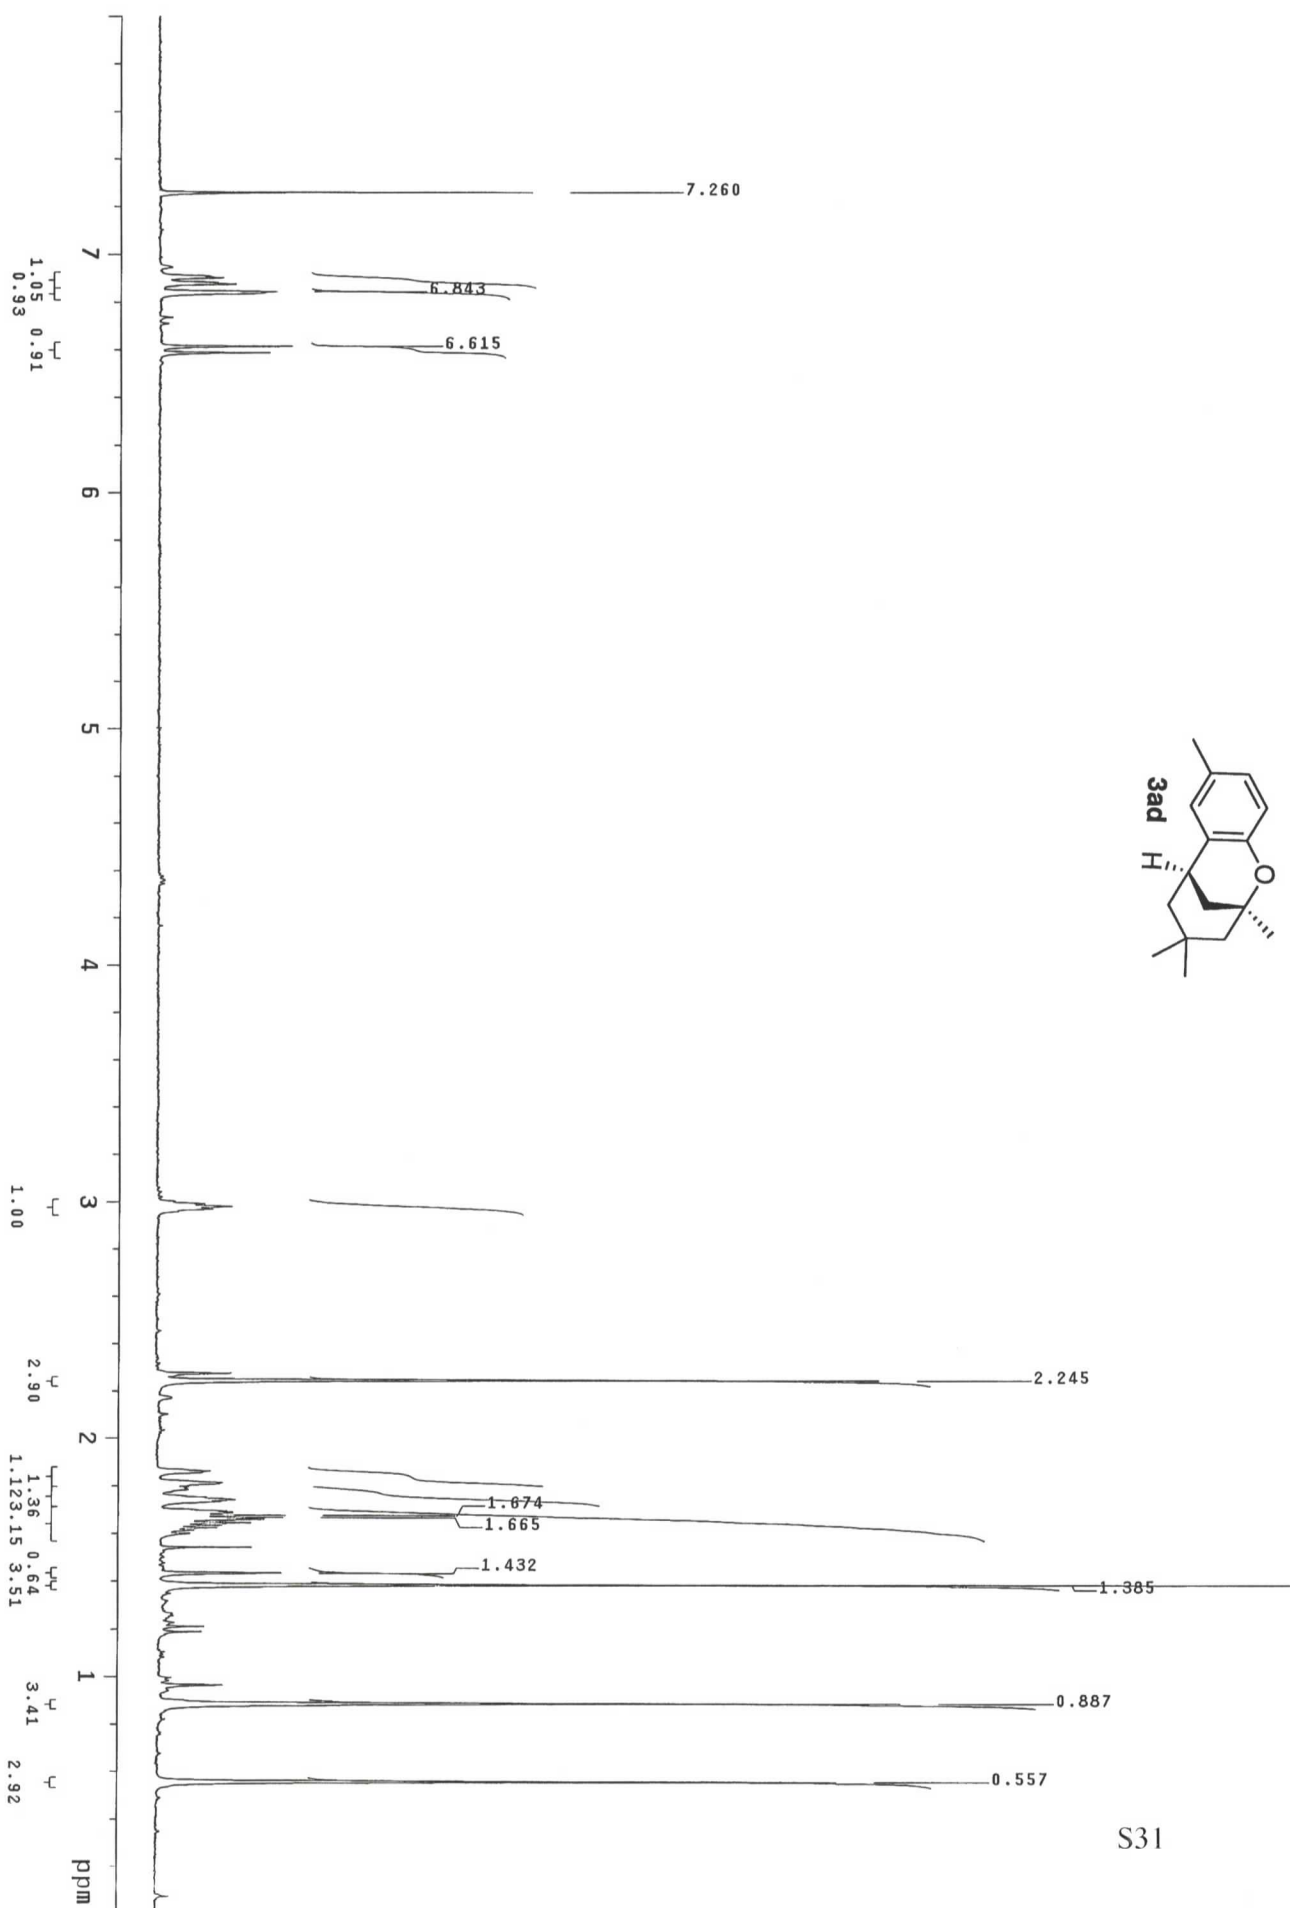

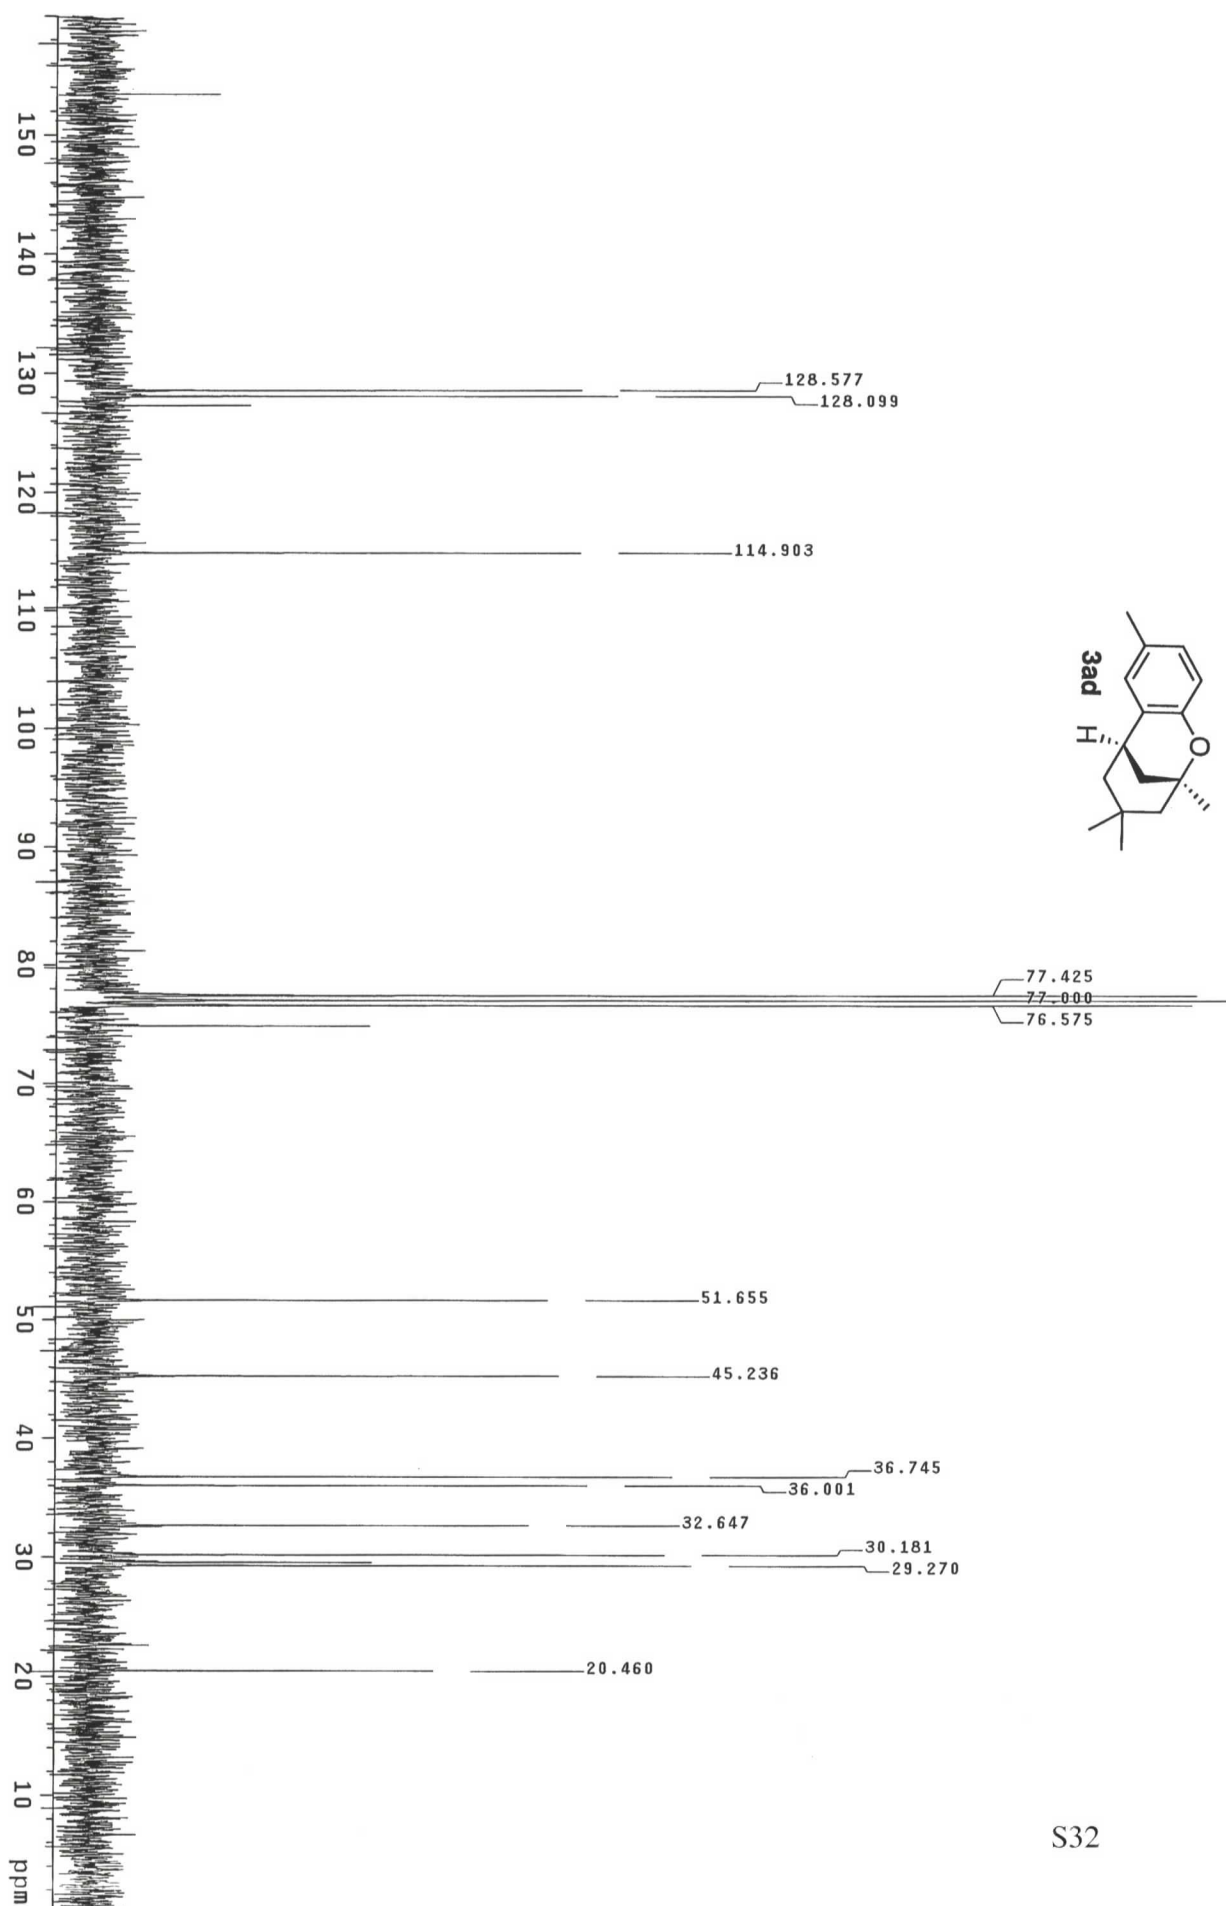

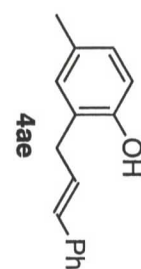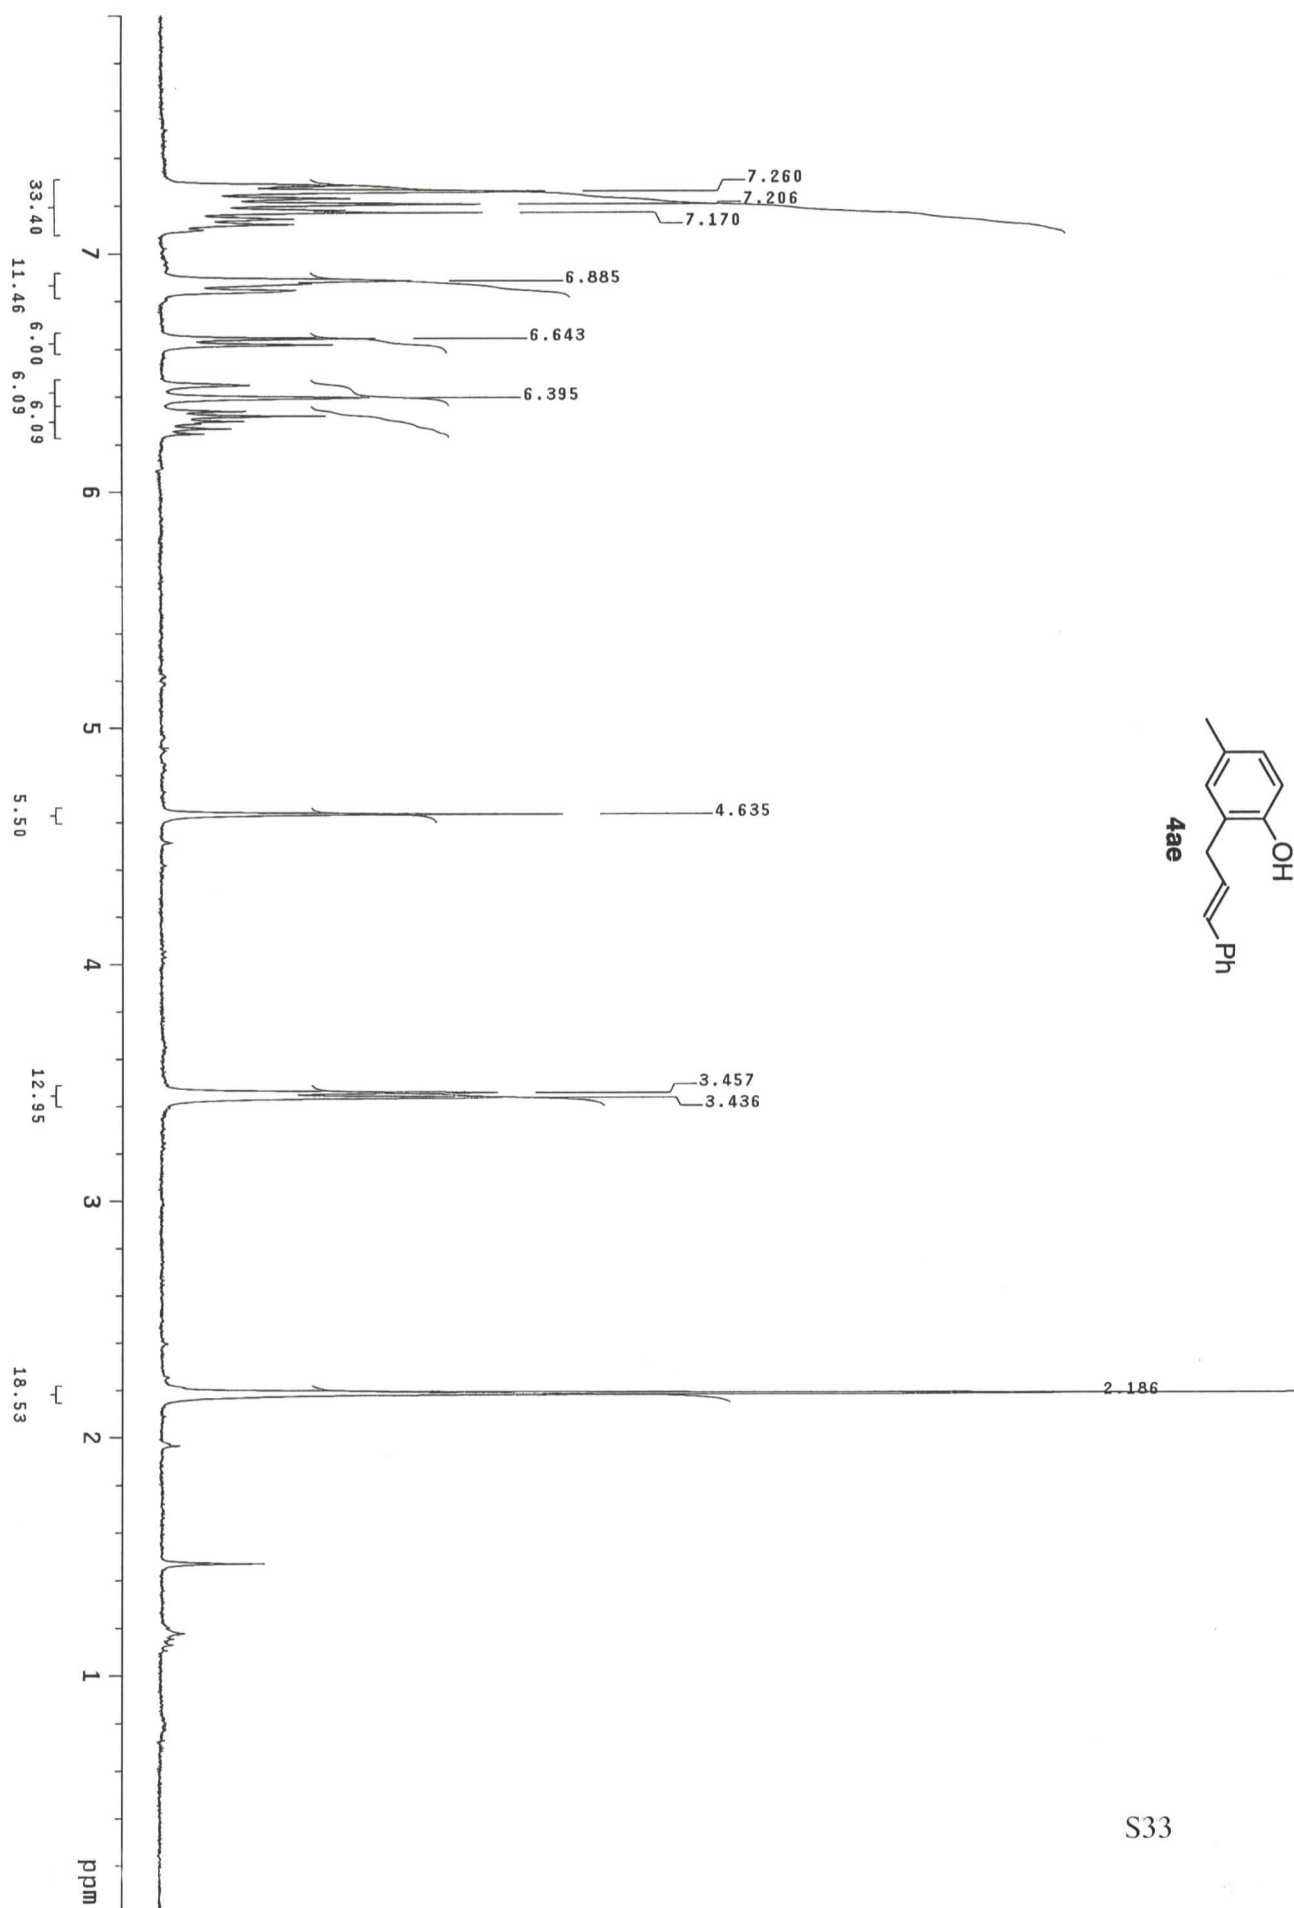



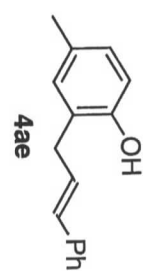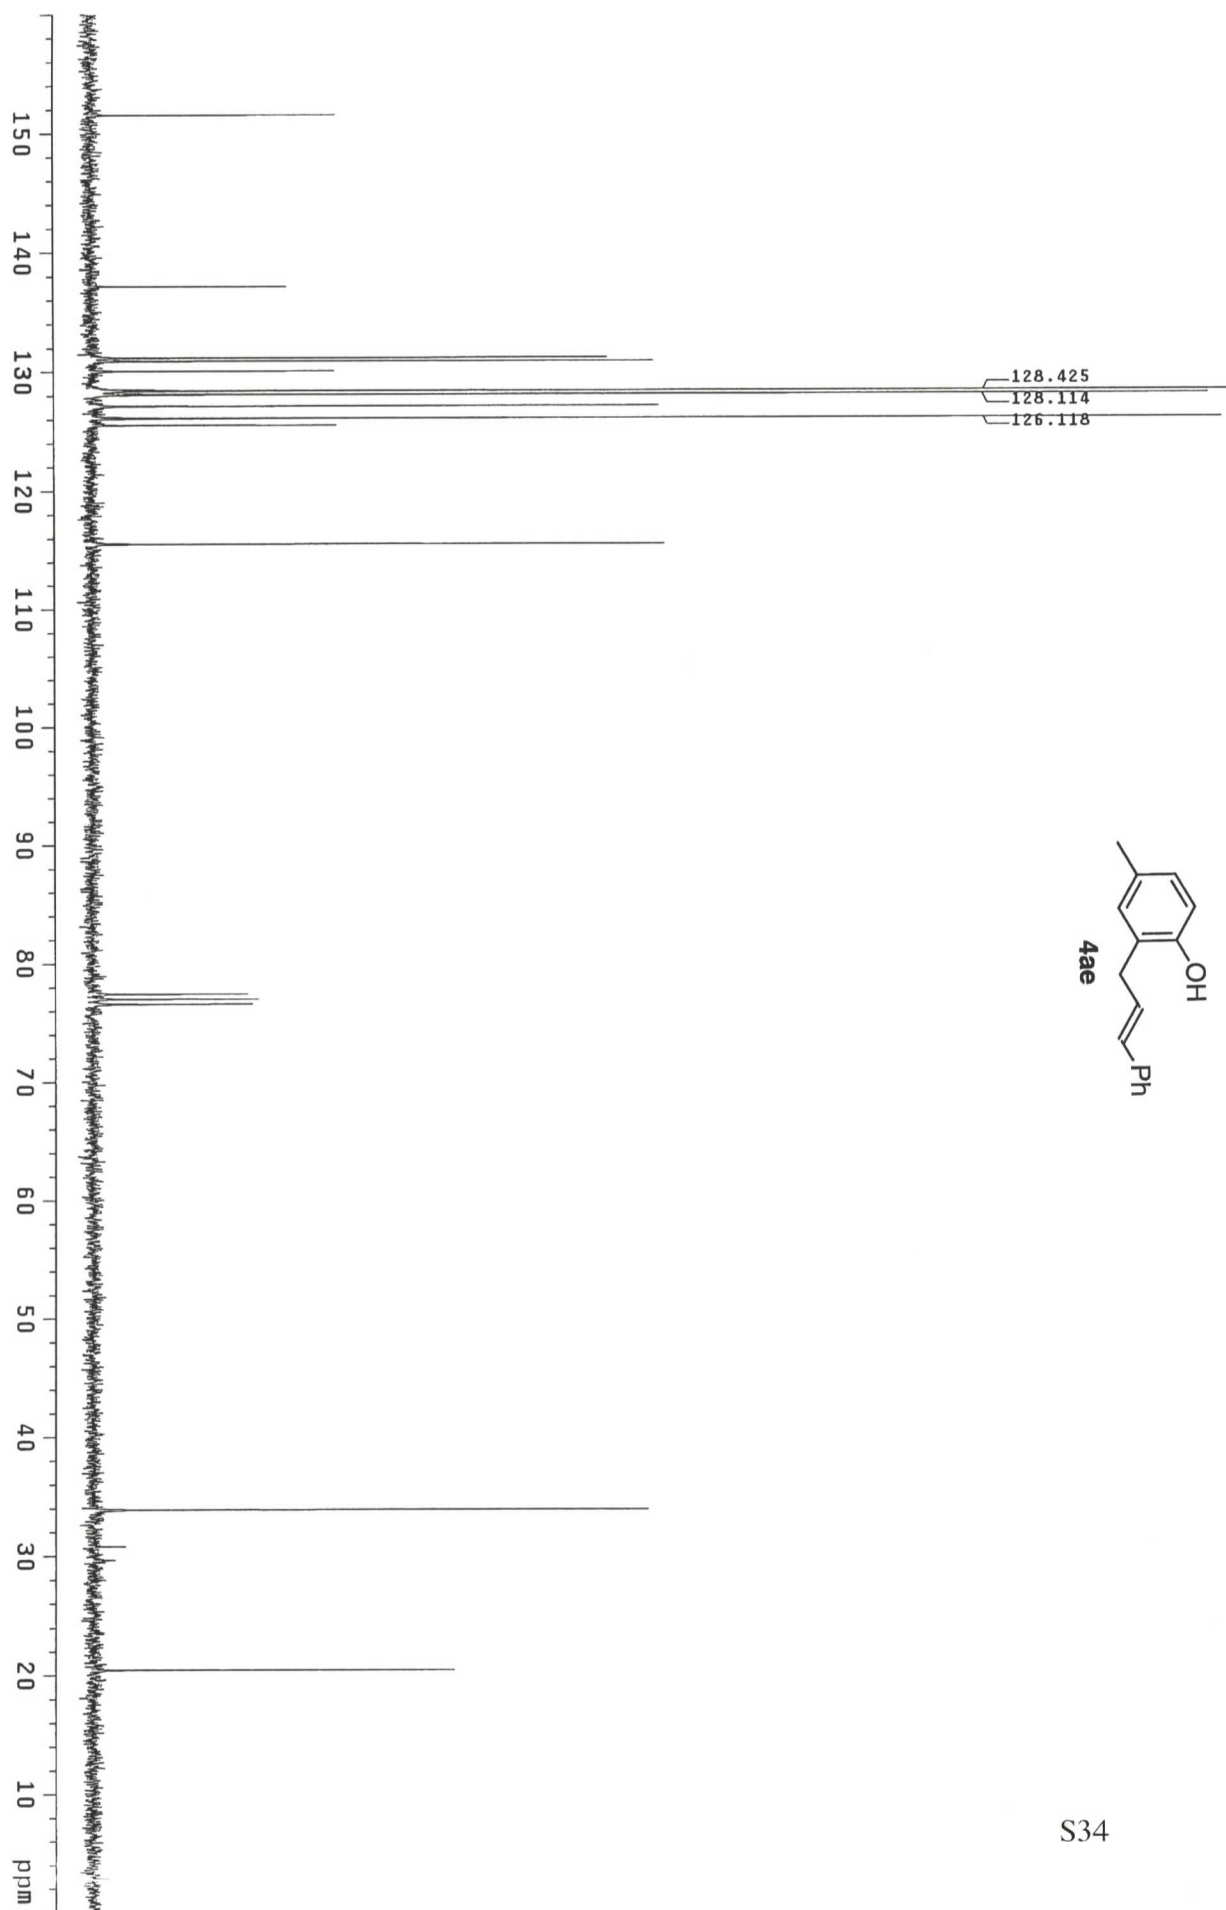

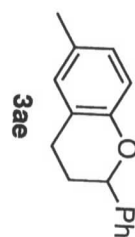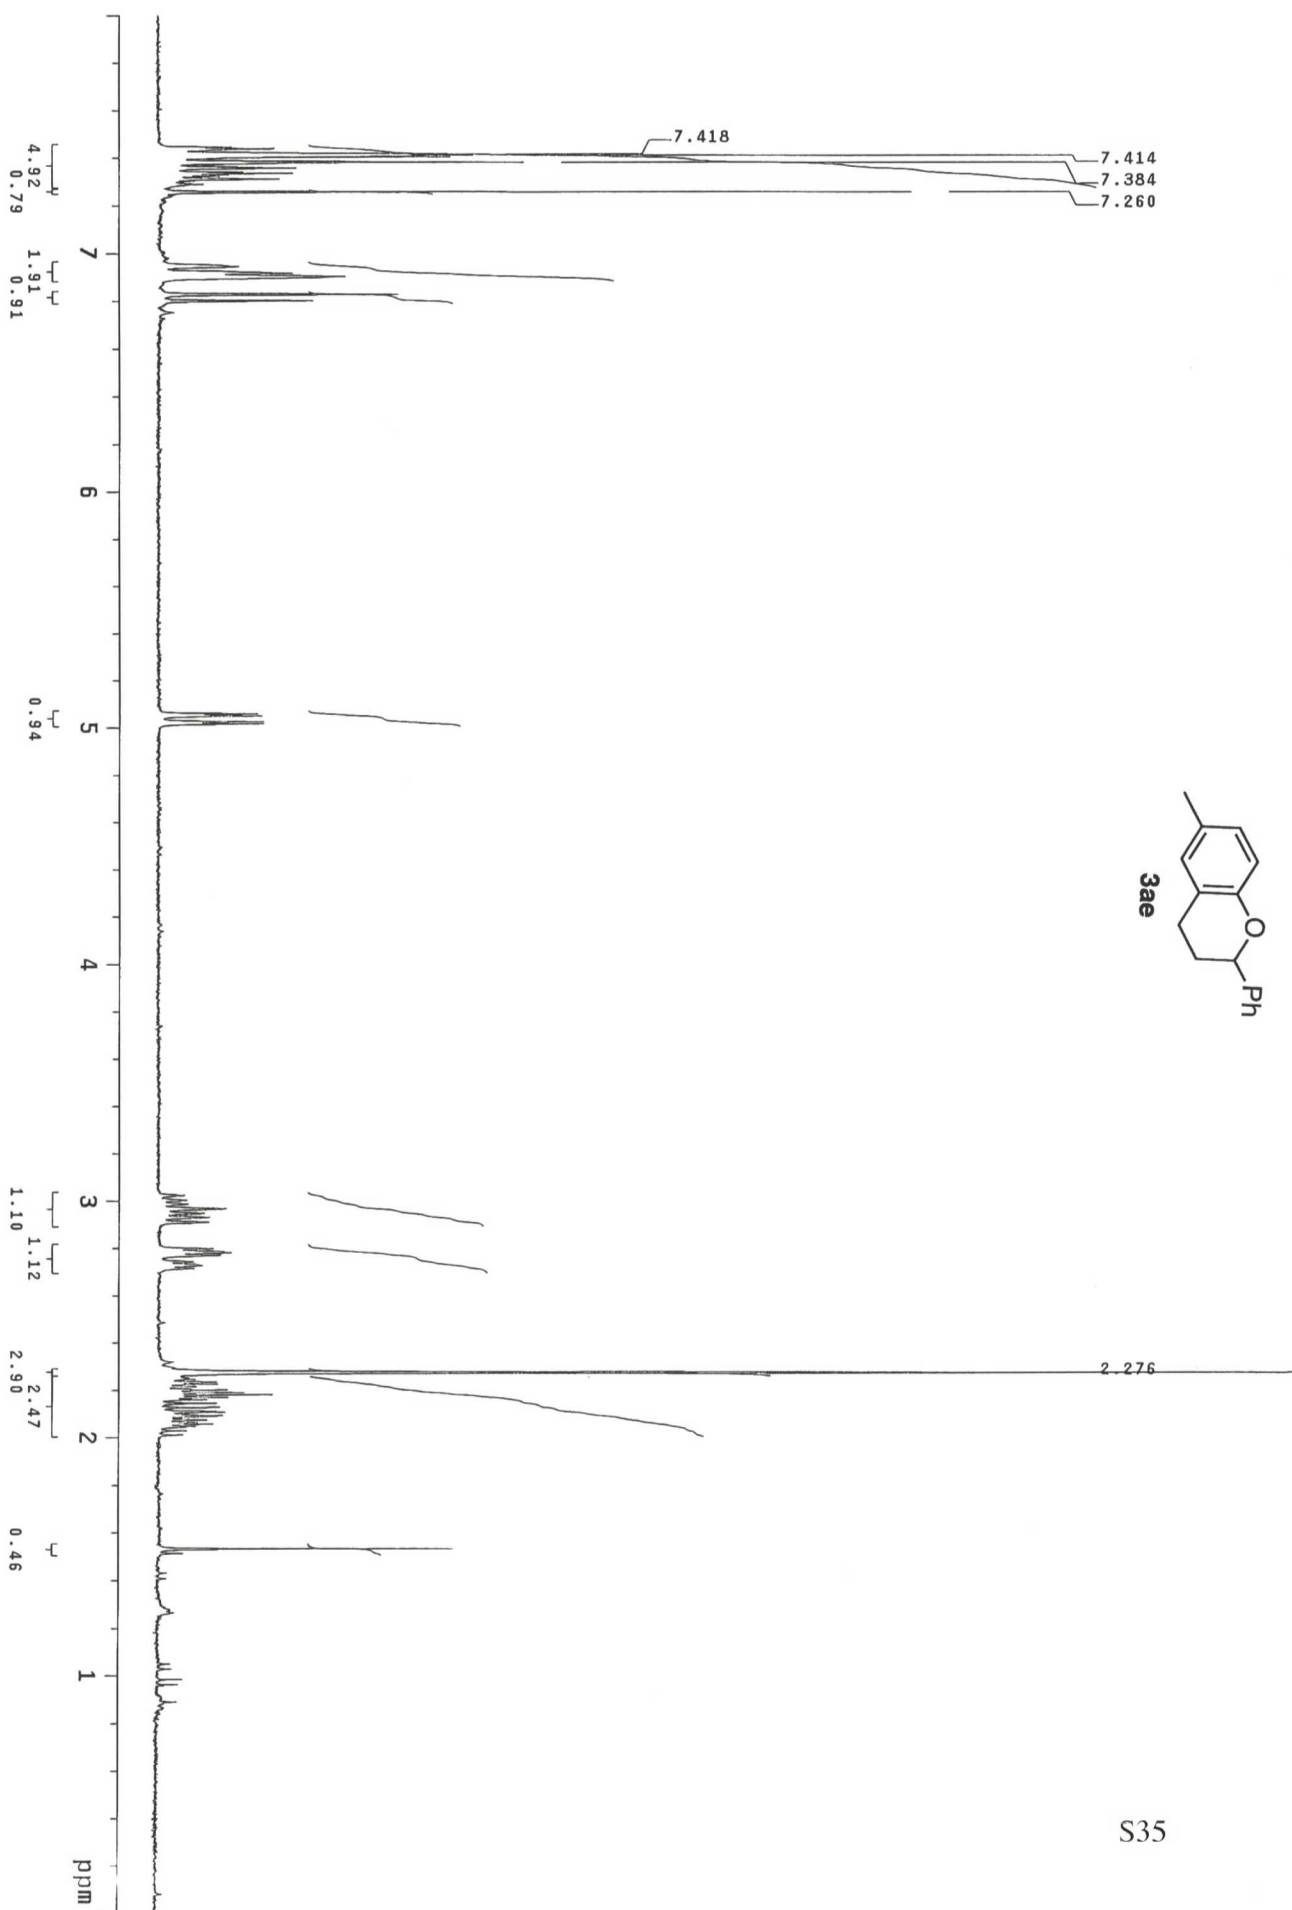

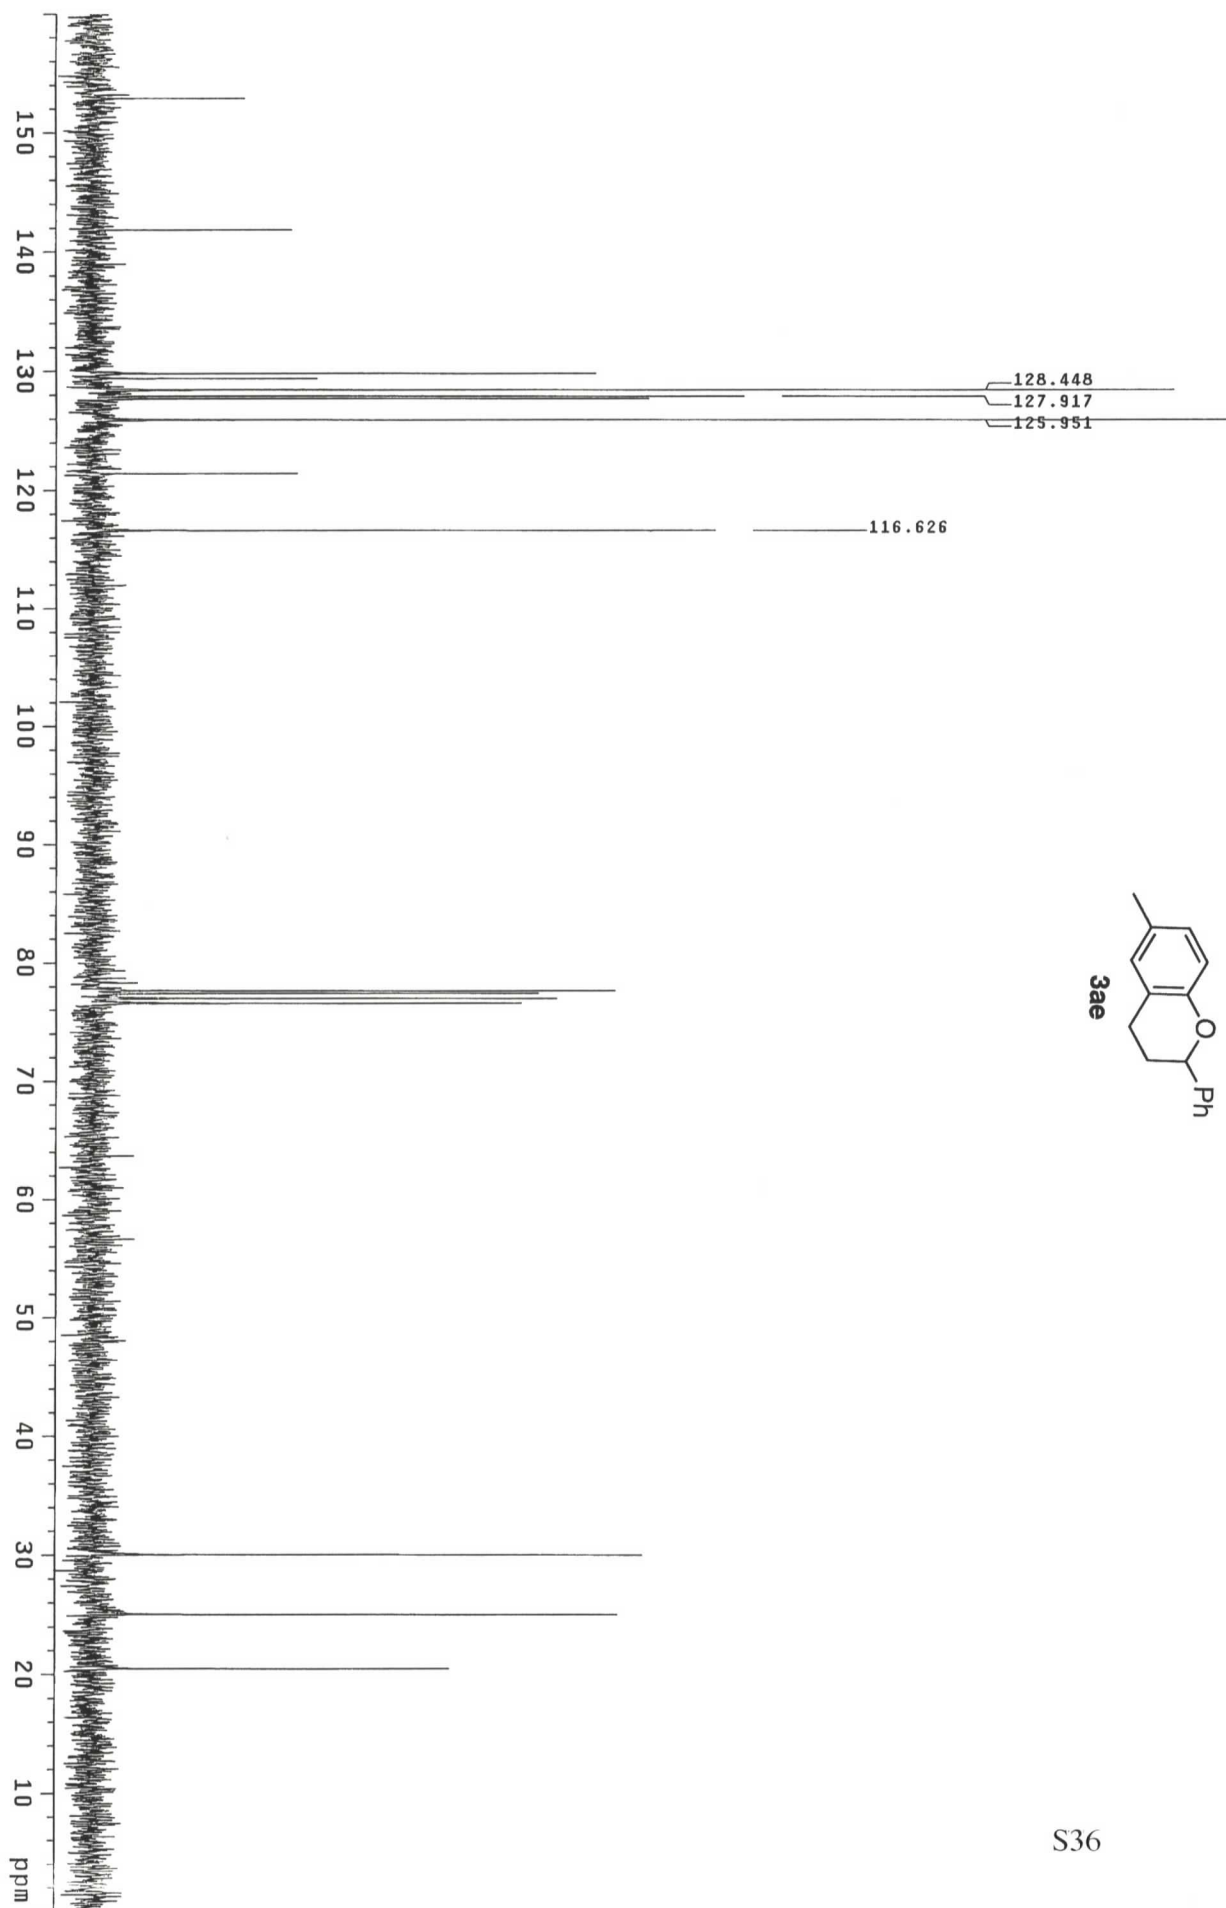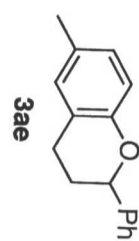

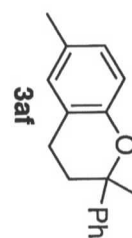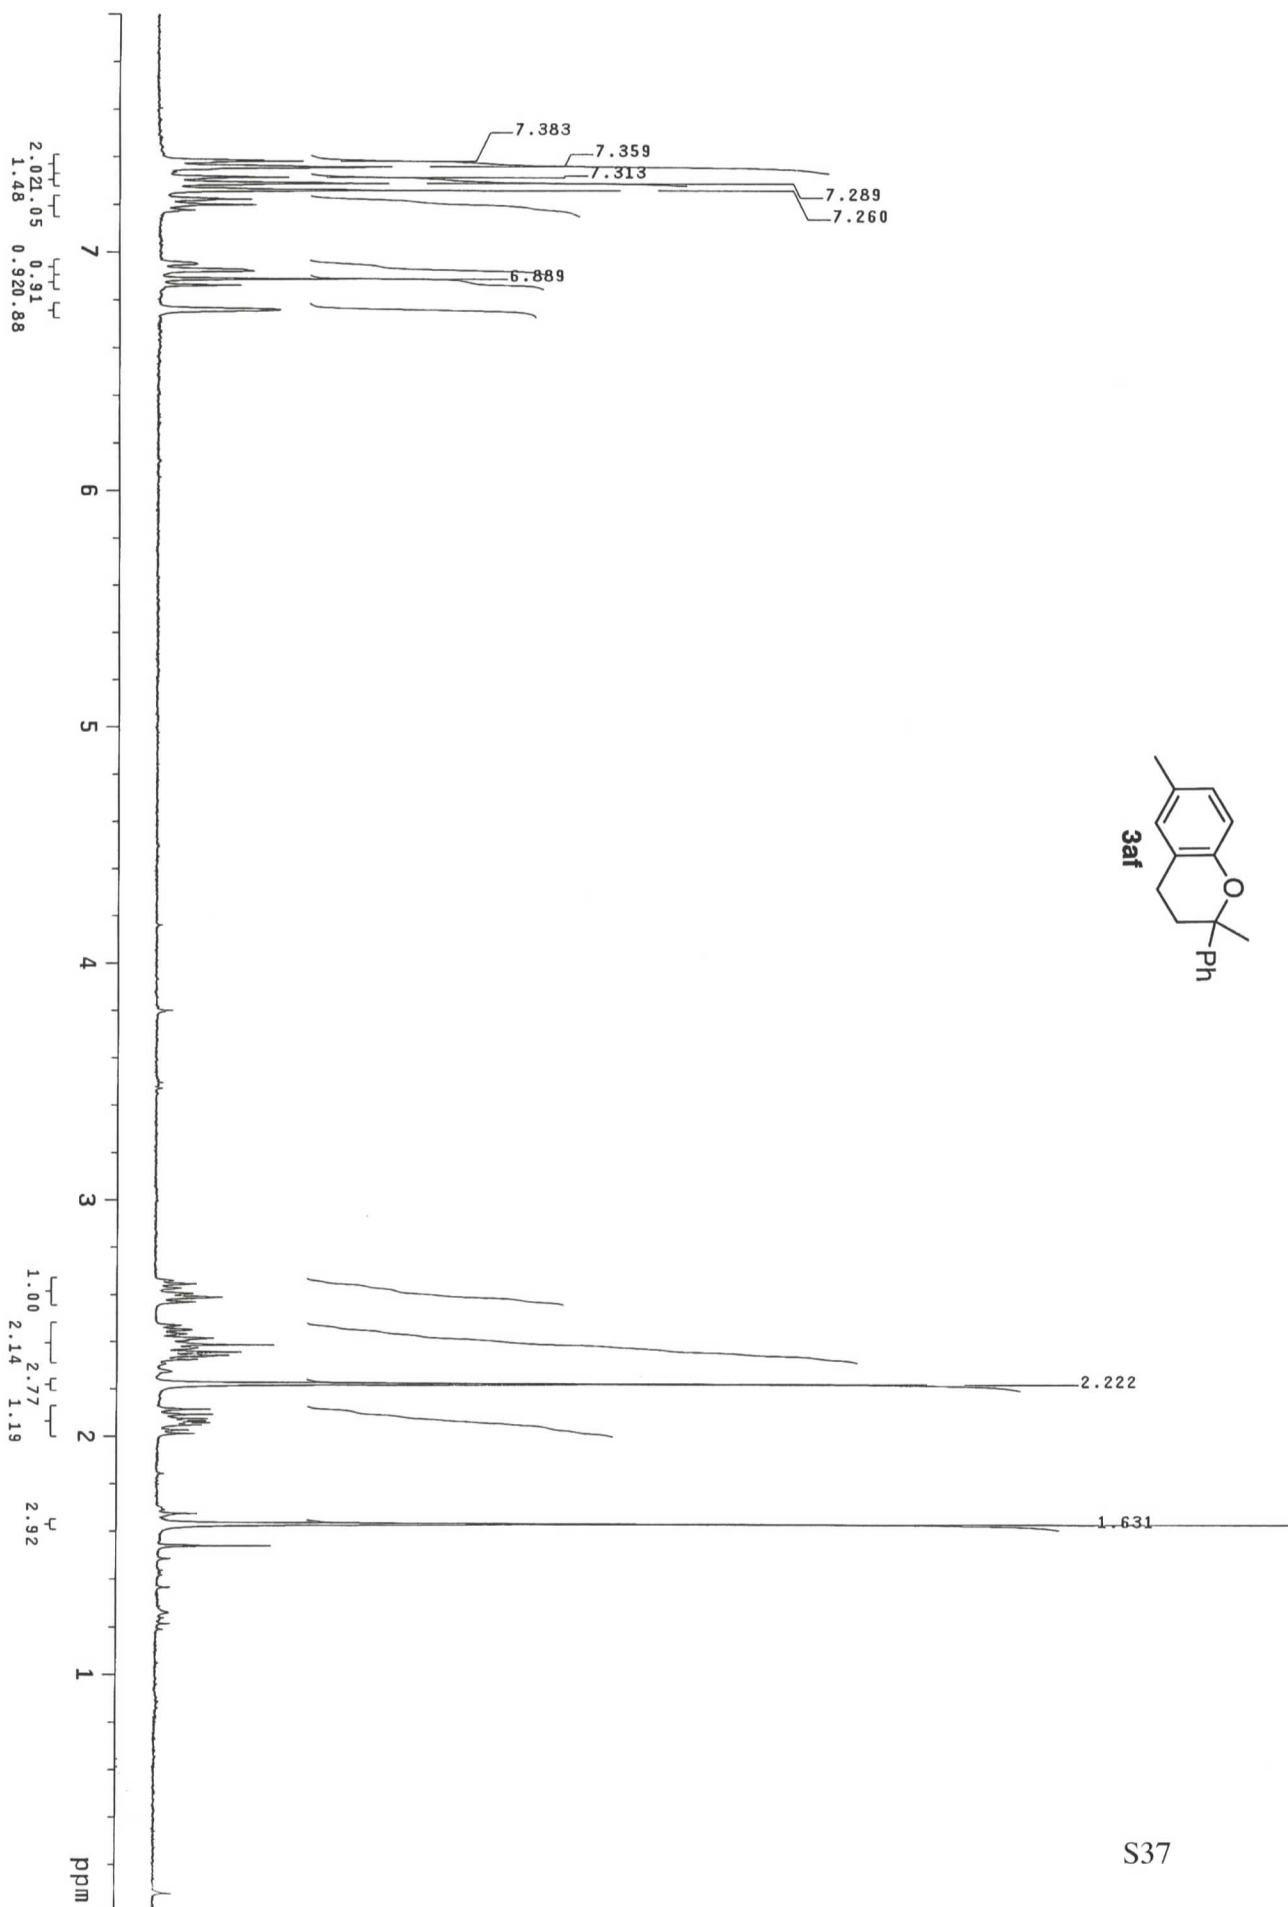

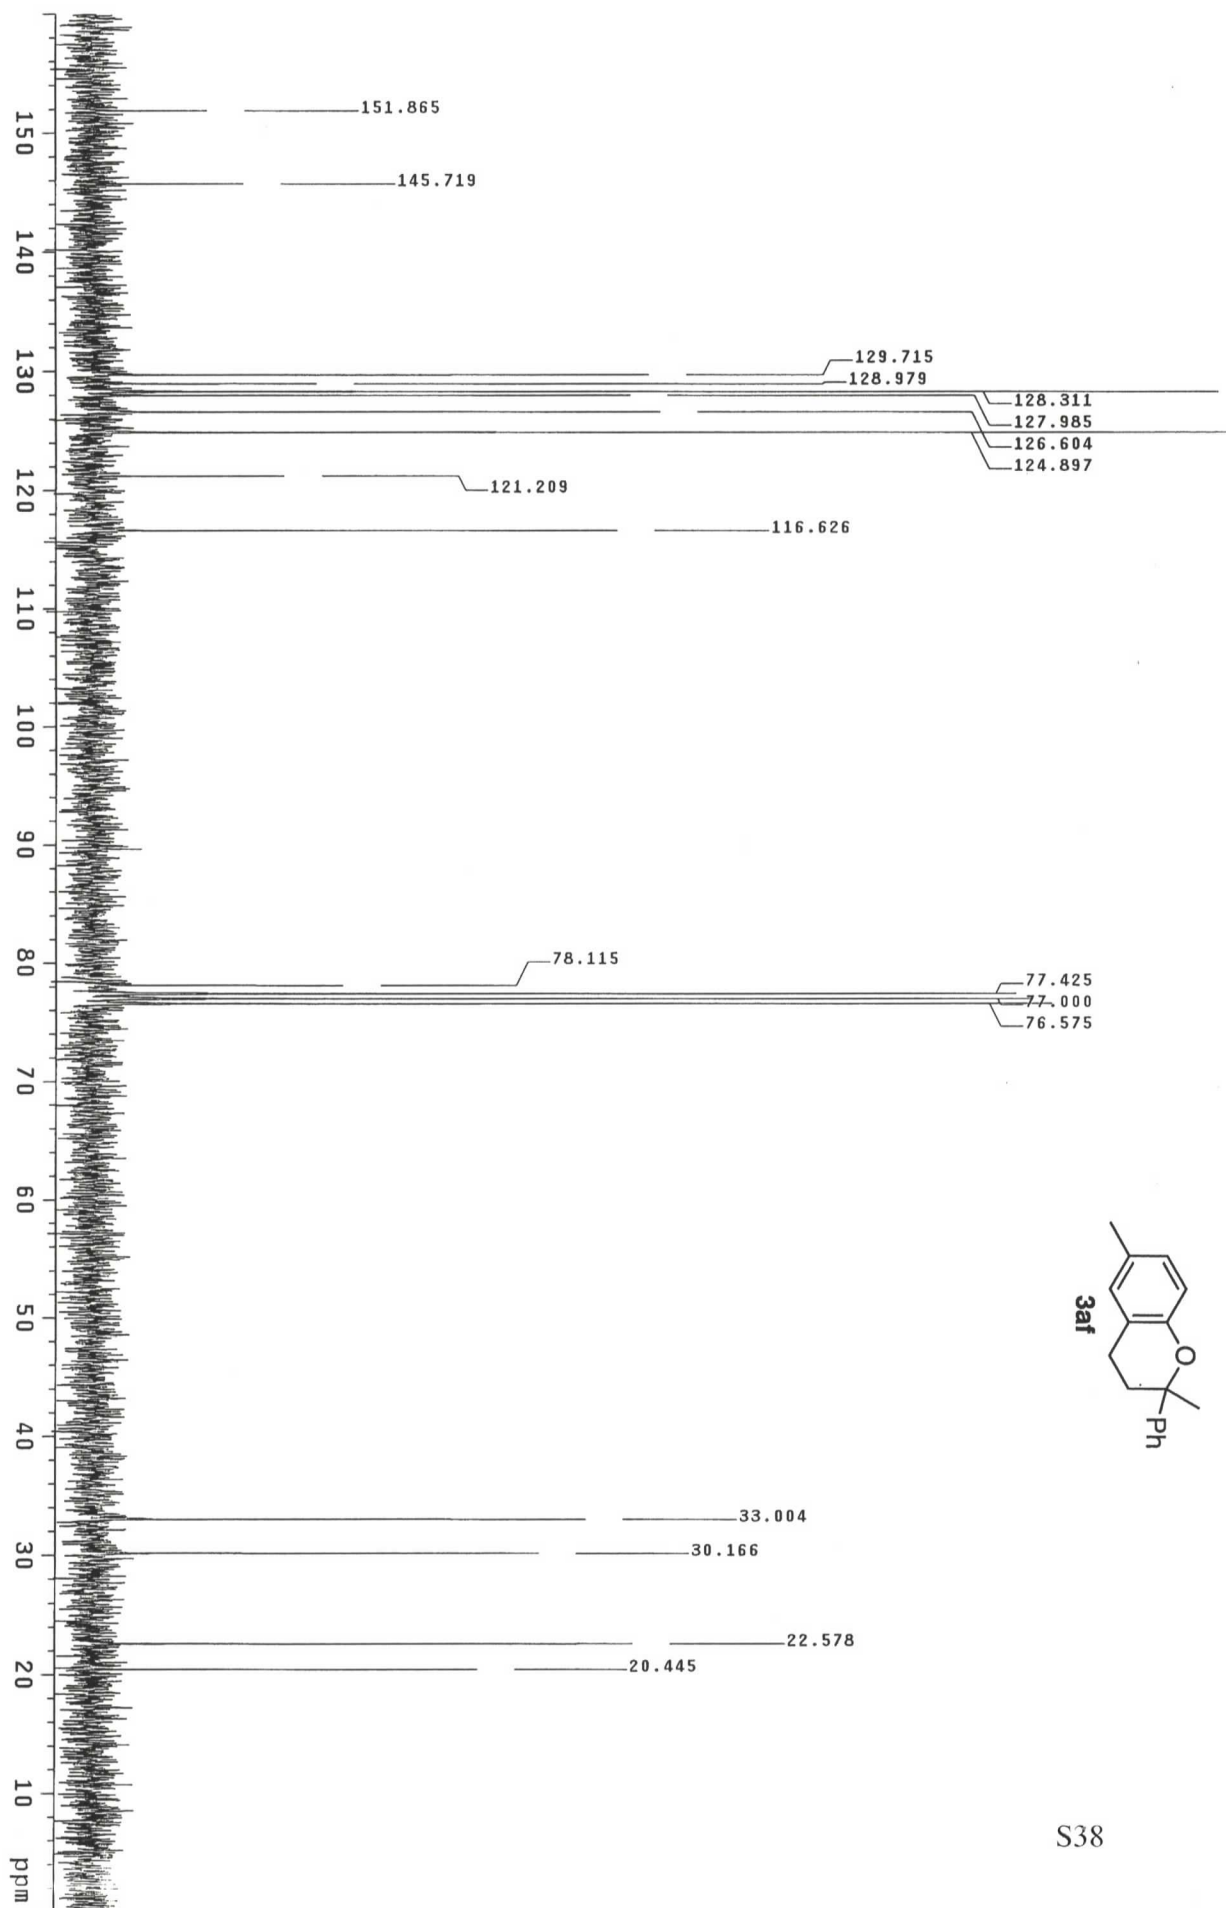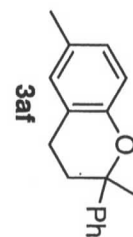

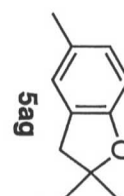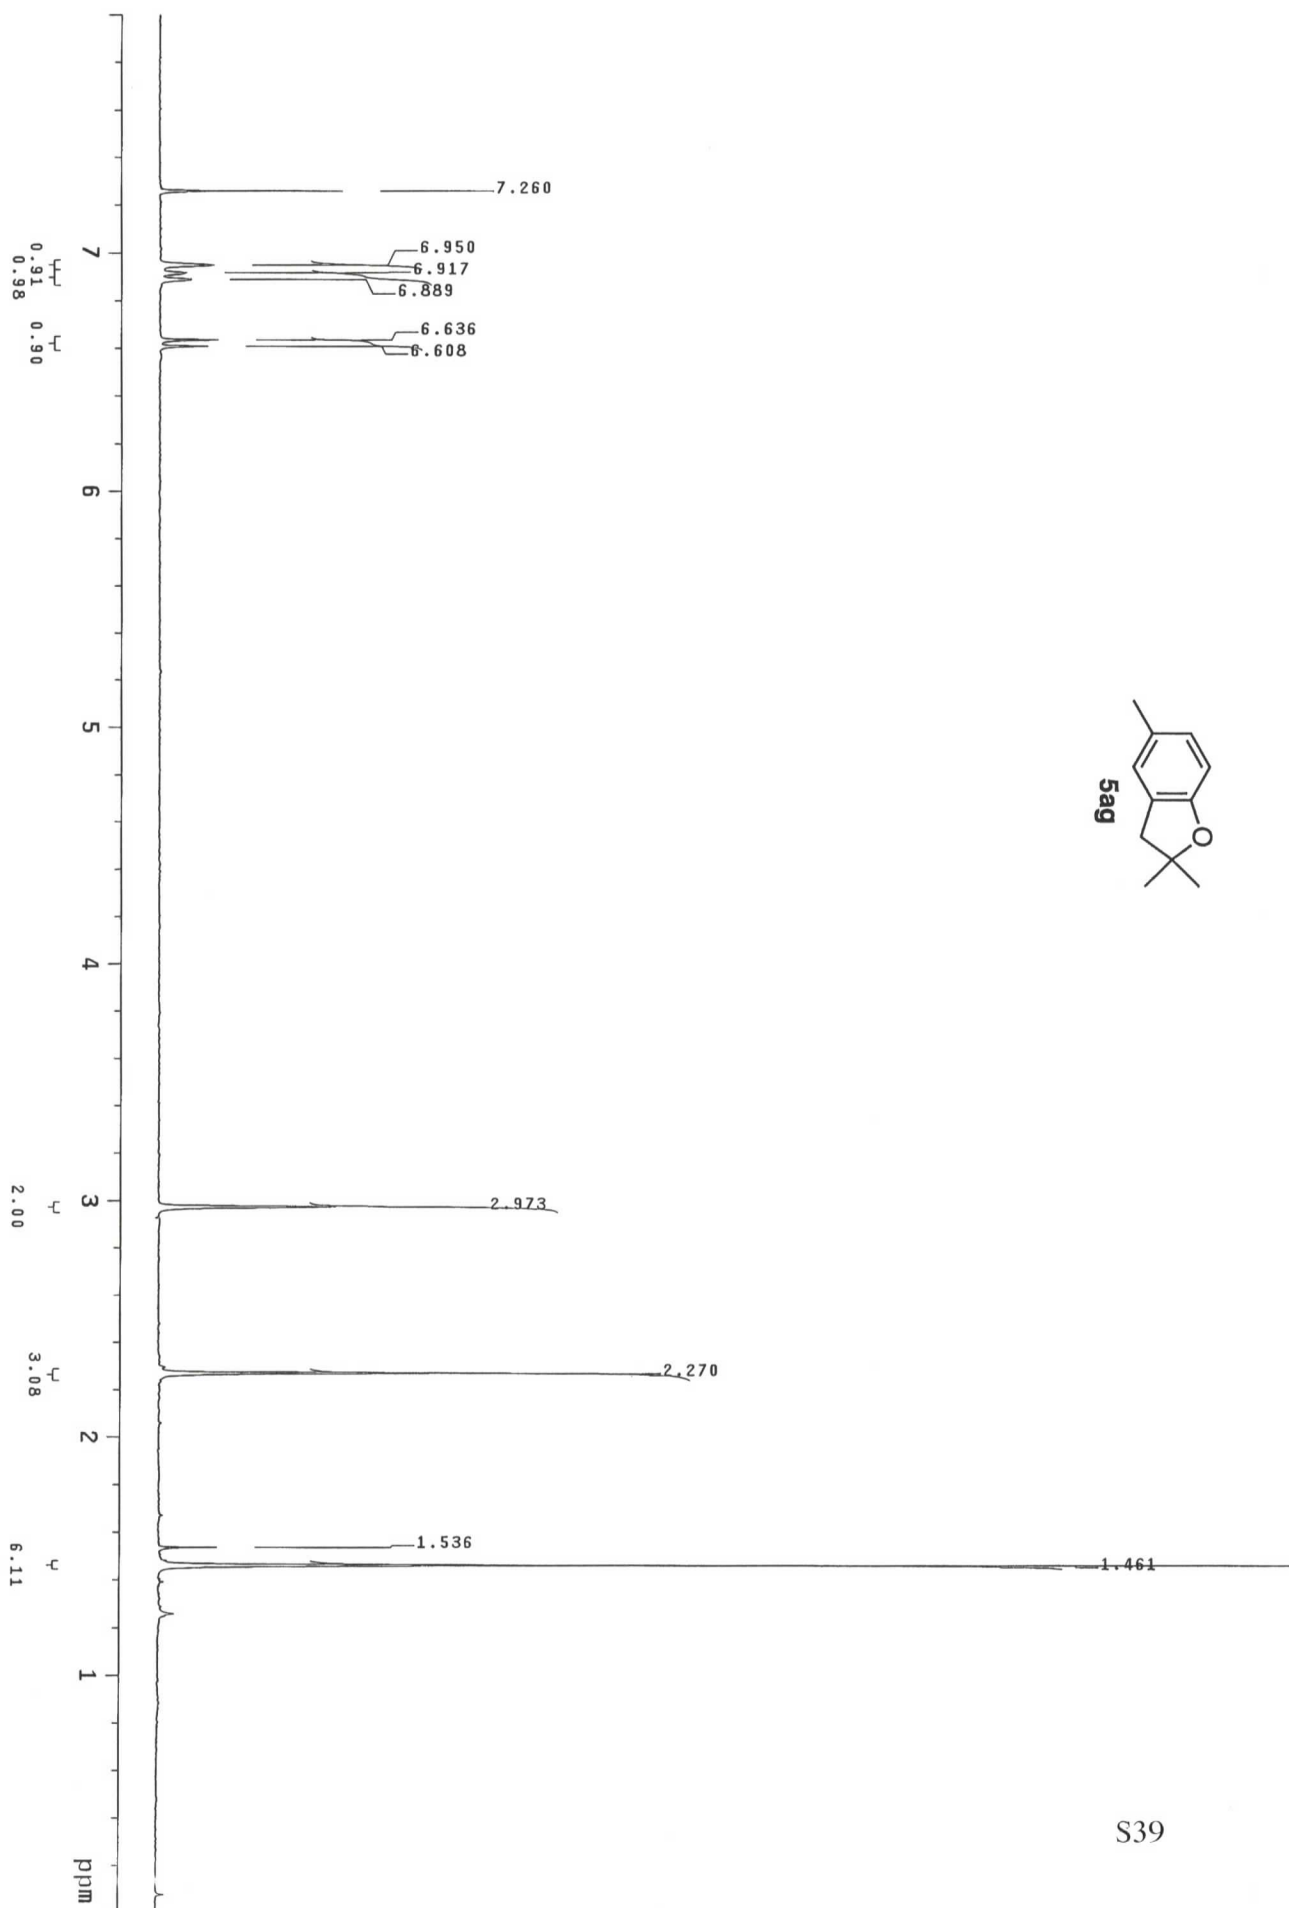



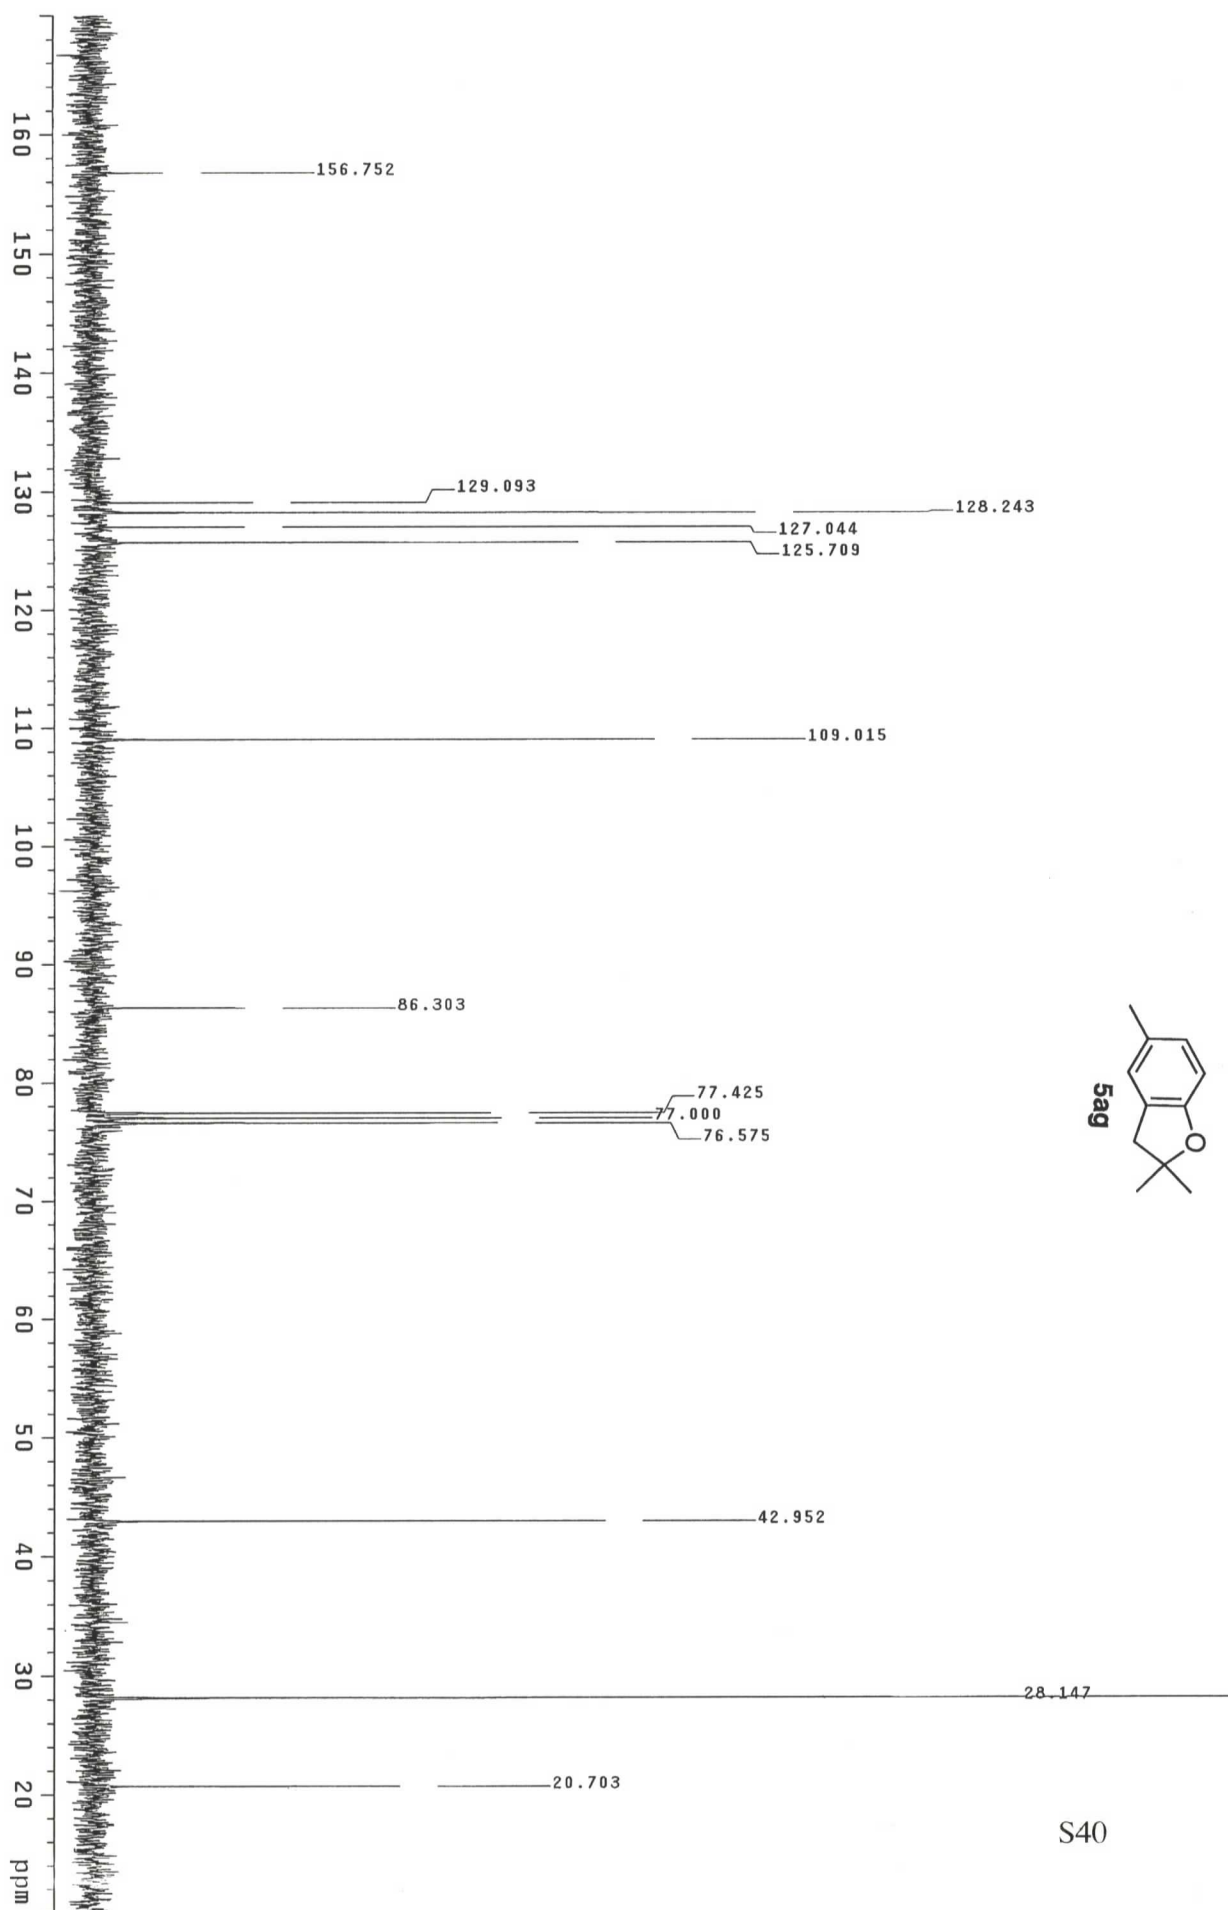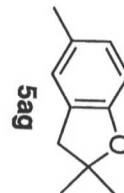

S40

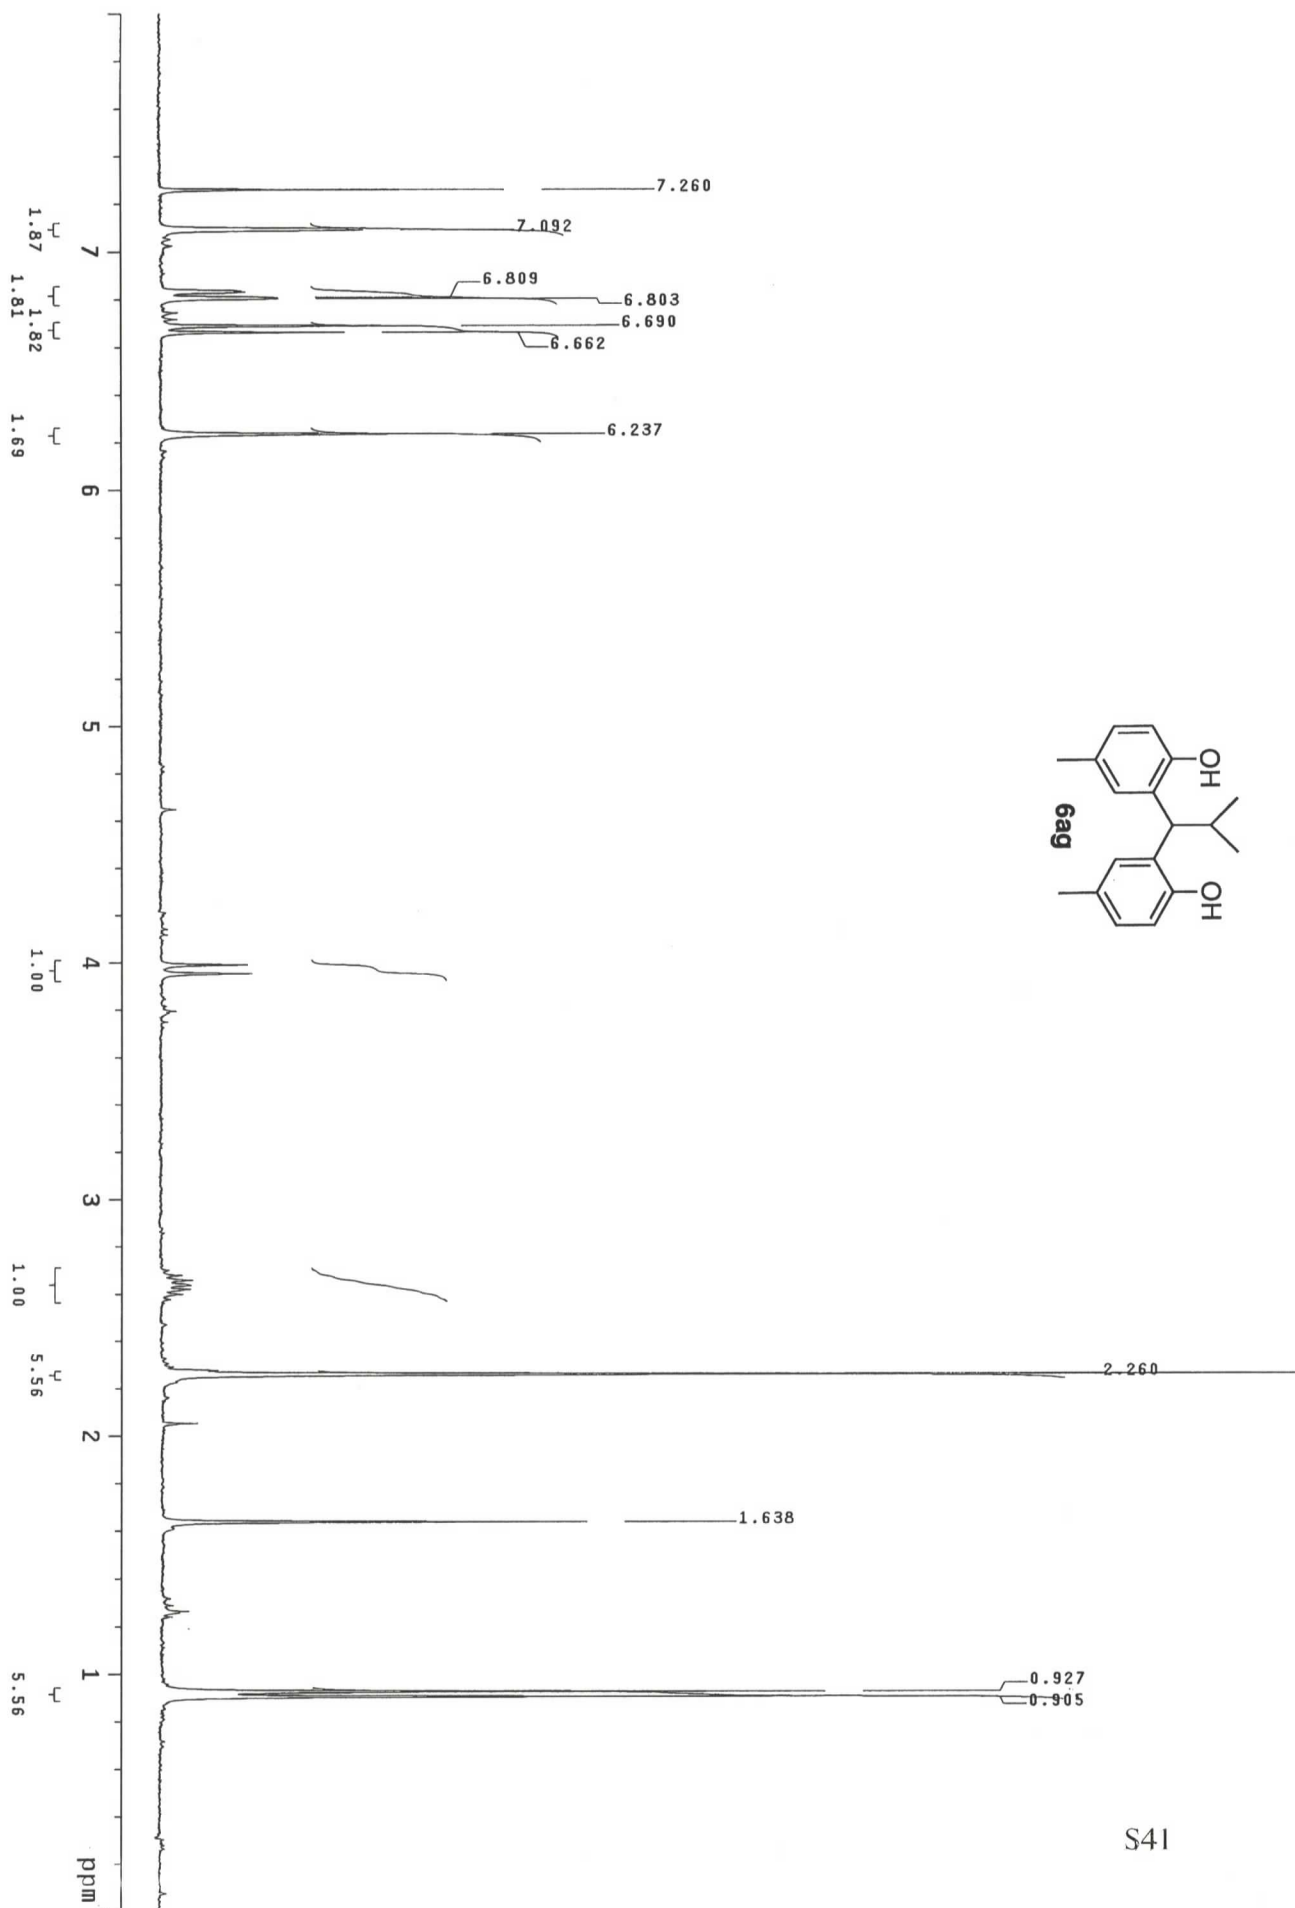

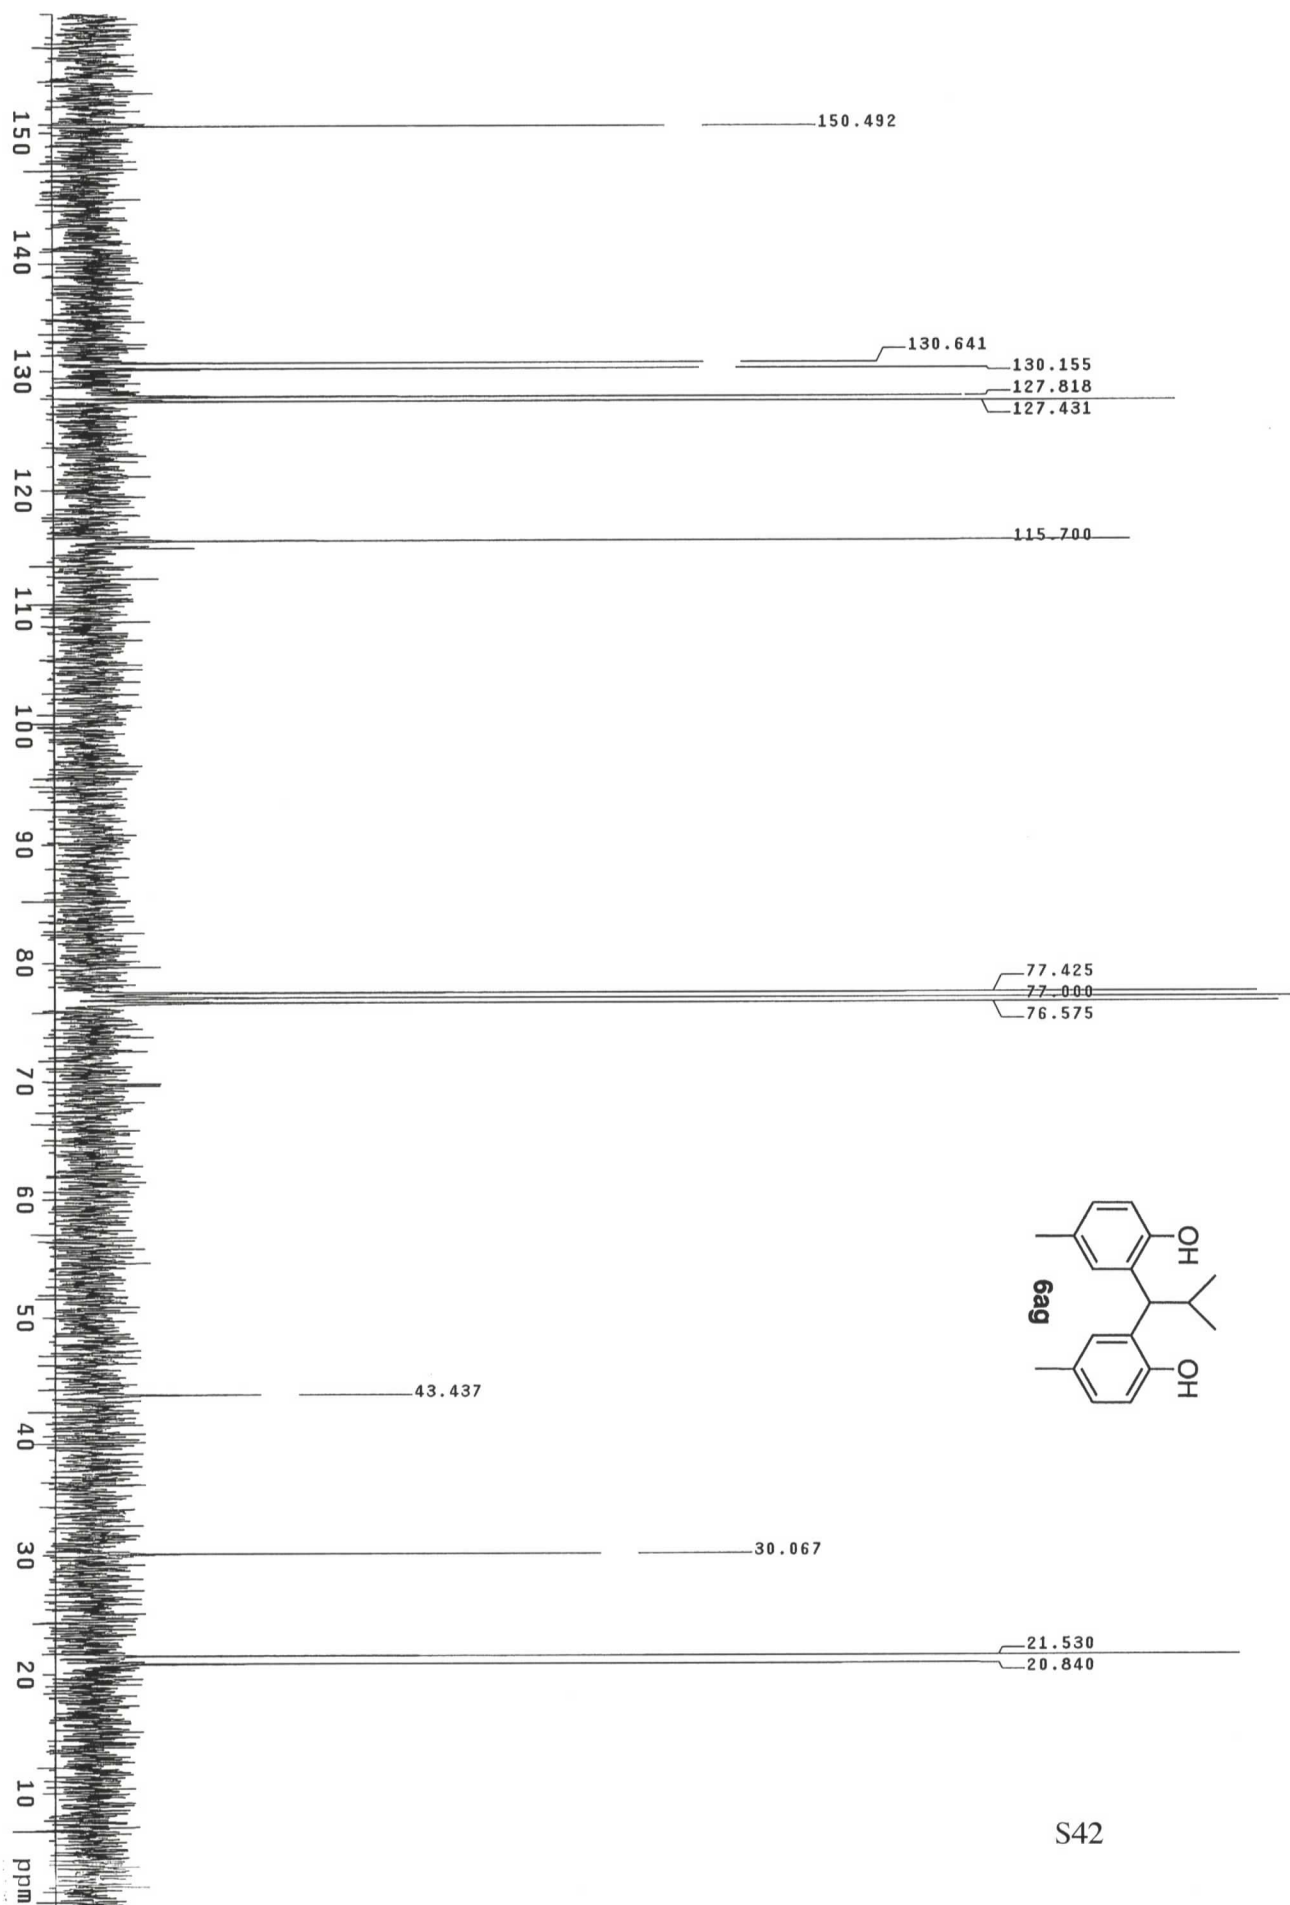

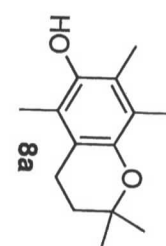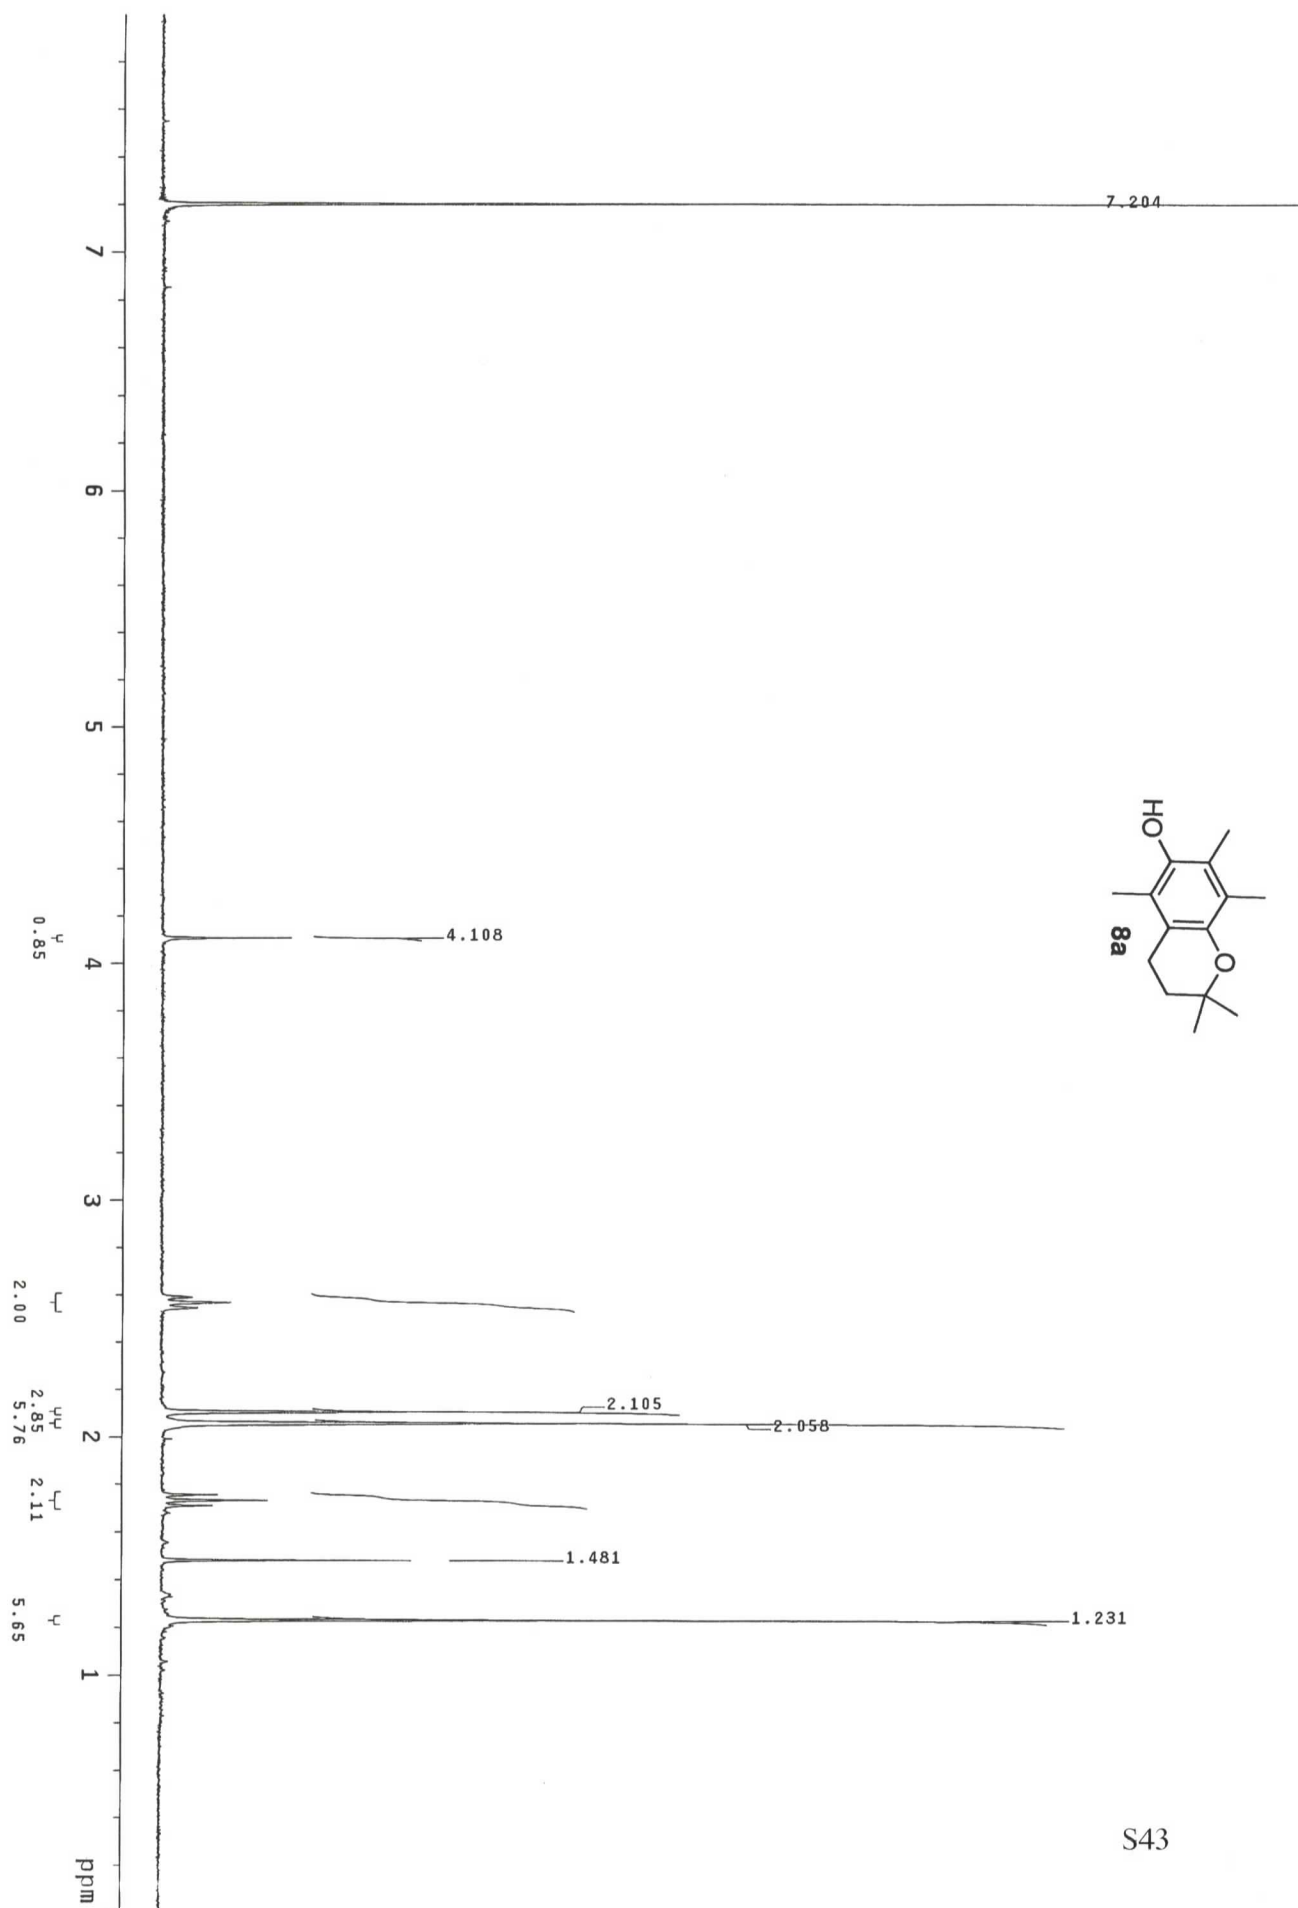

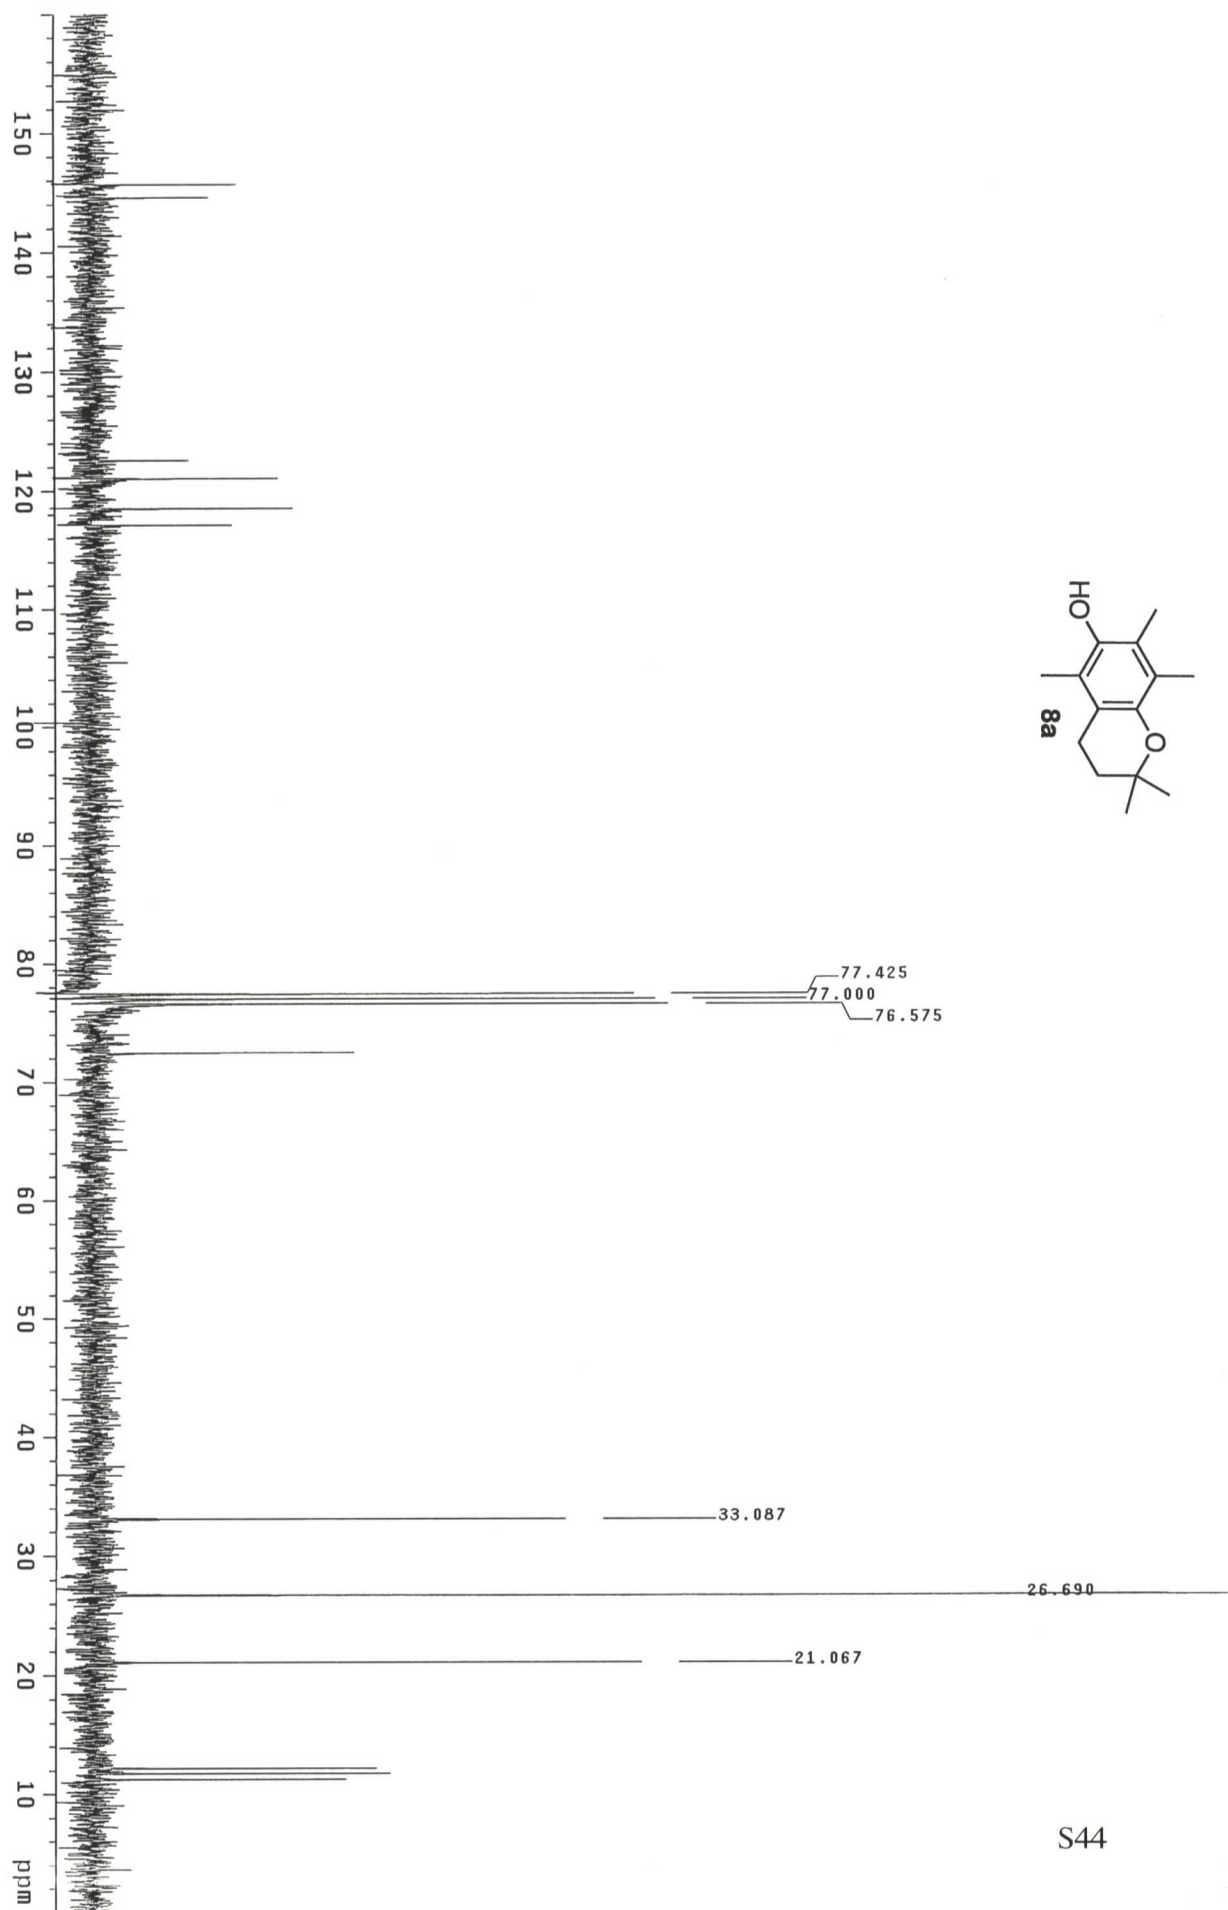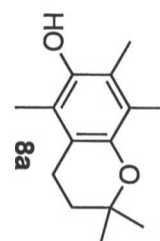

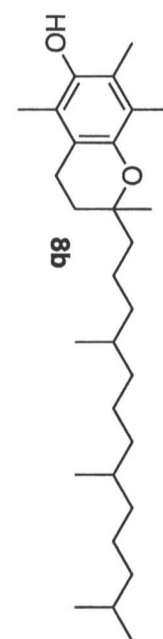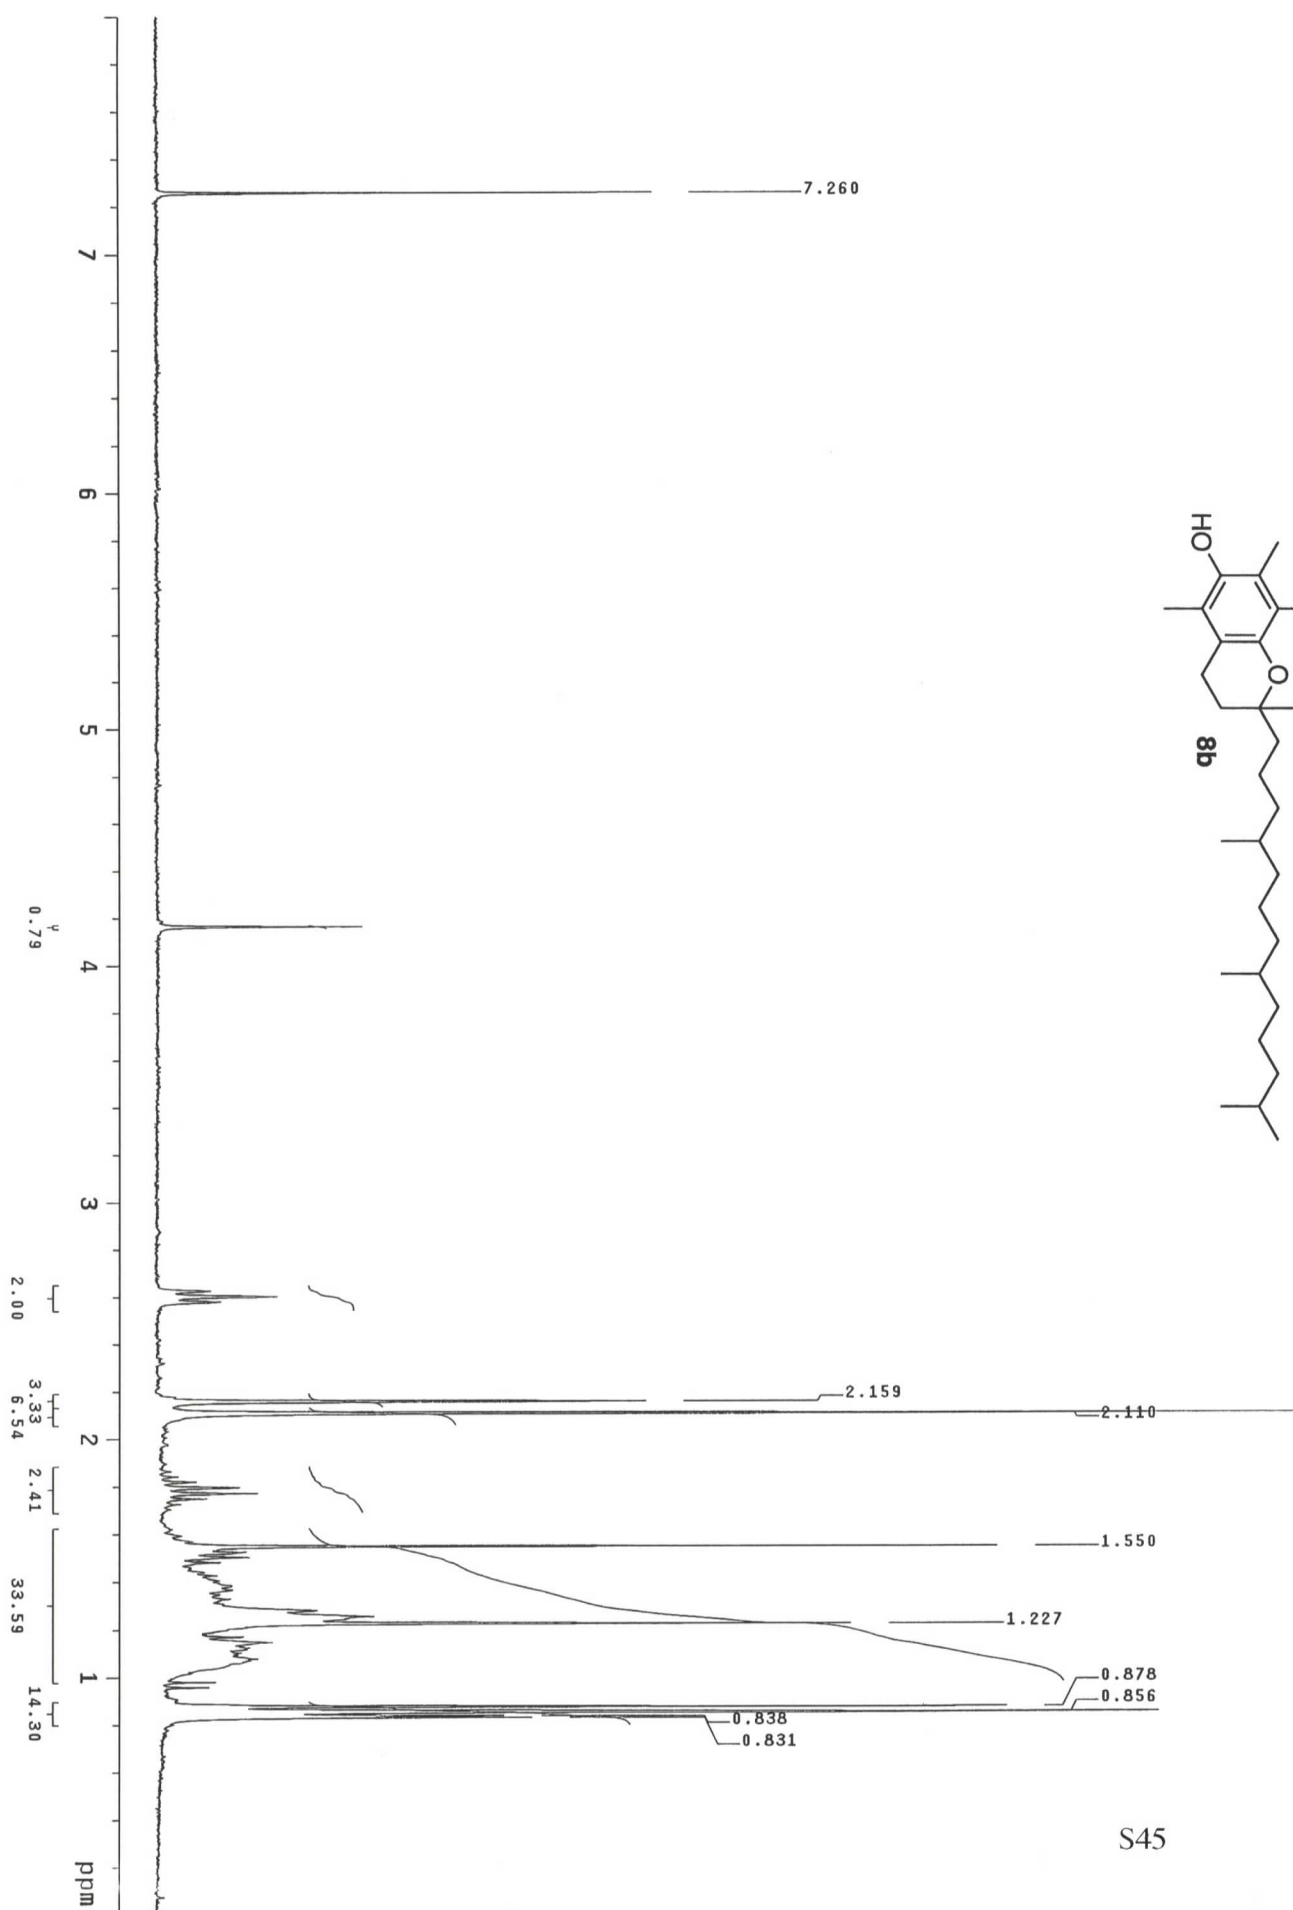



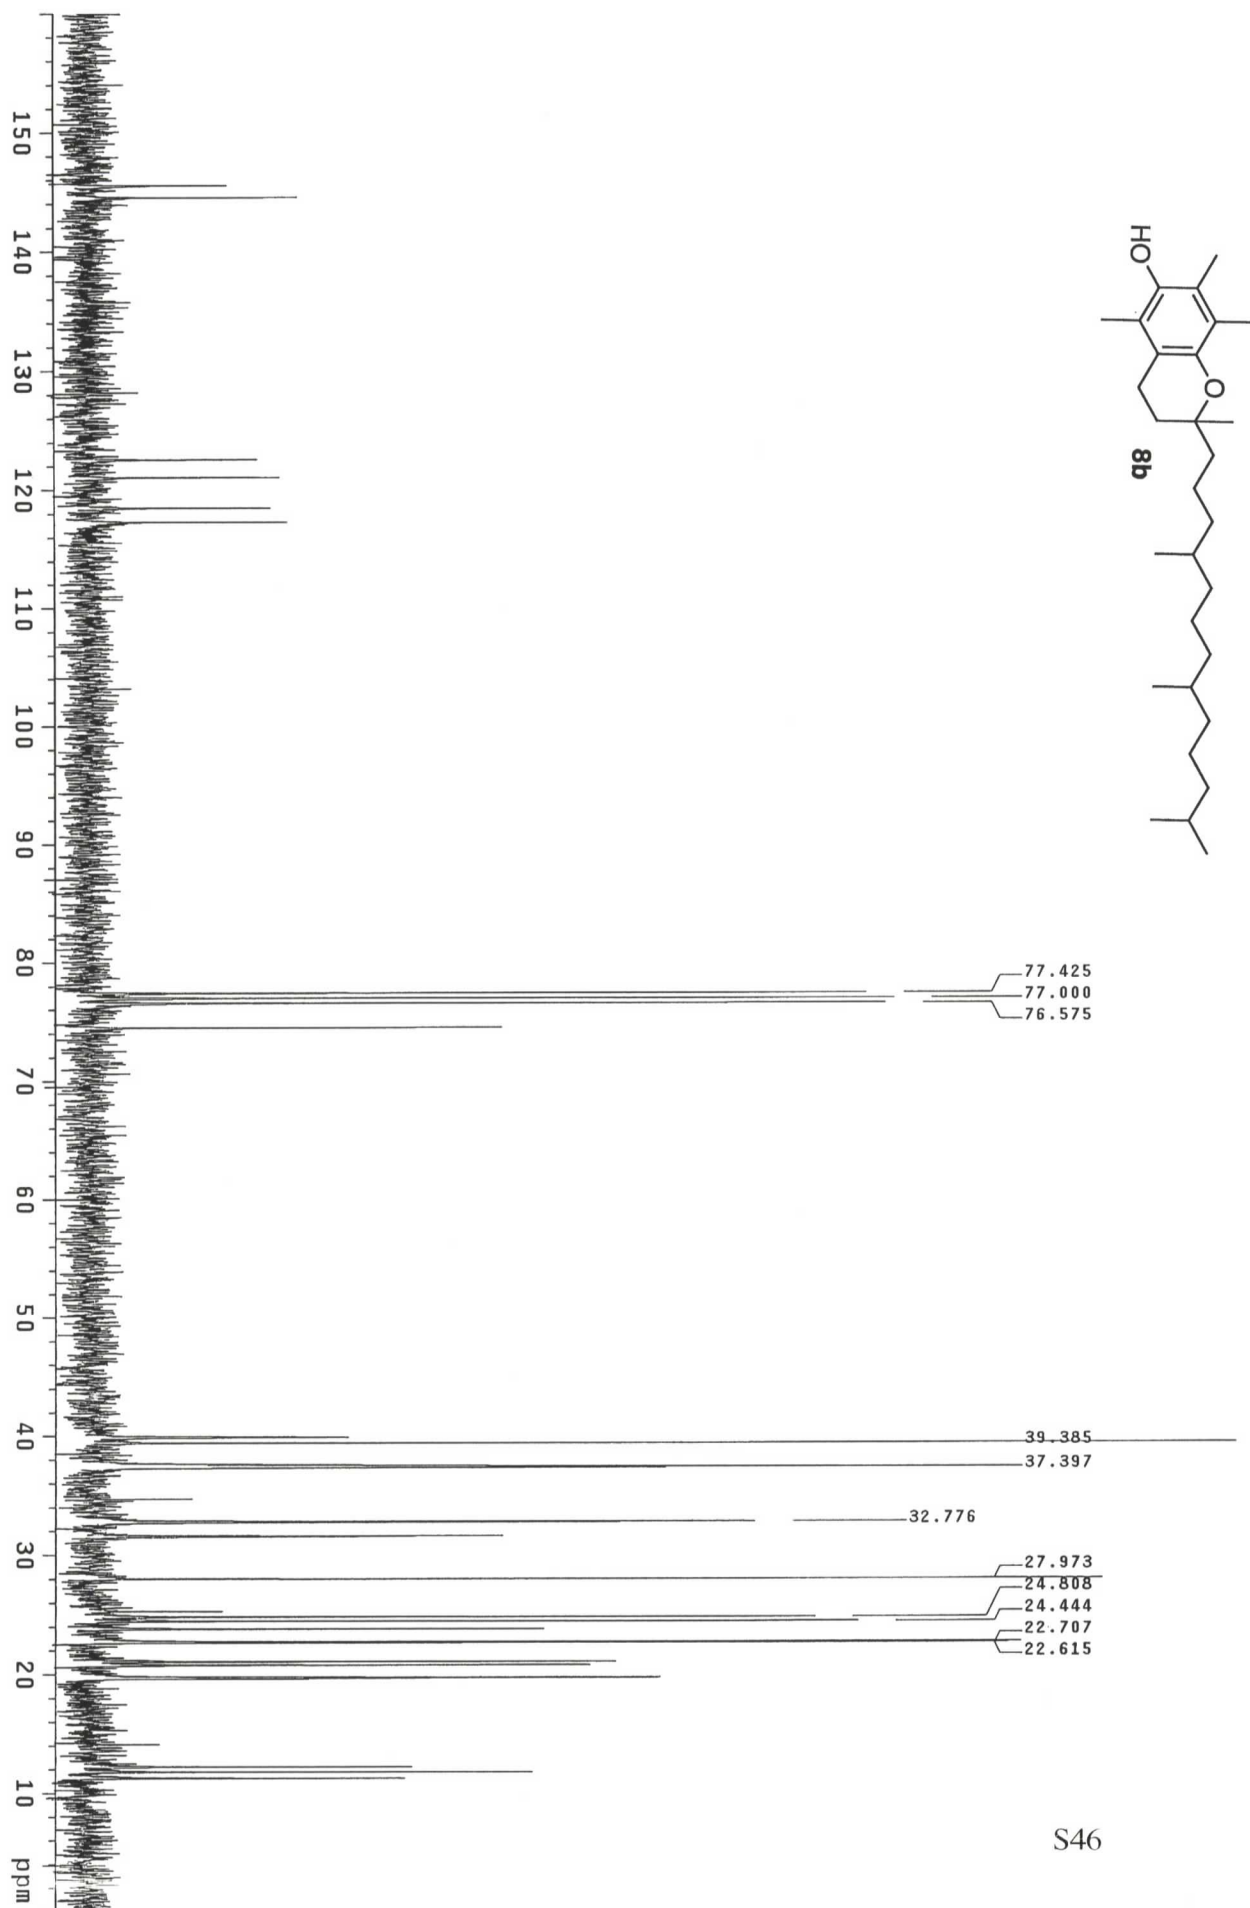

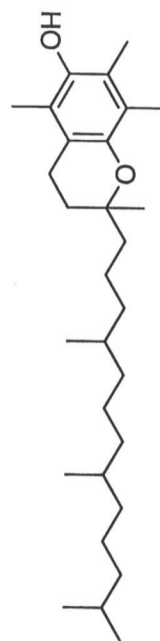

*DL*- $\alpha$ -tocopherol, purity >98%  
Wako Pure Chemical Industries (cat. No. 209-01791)

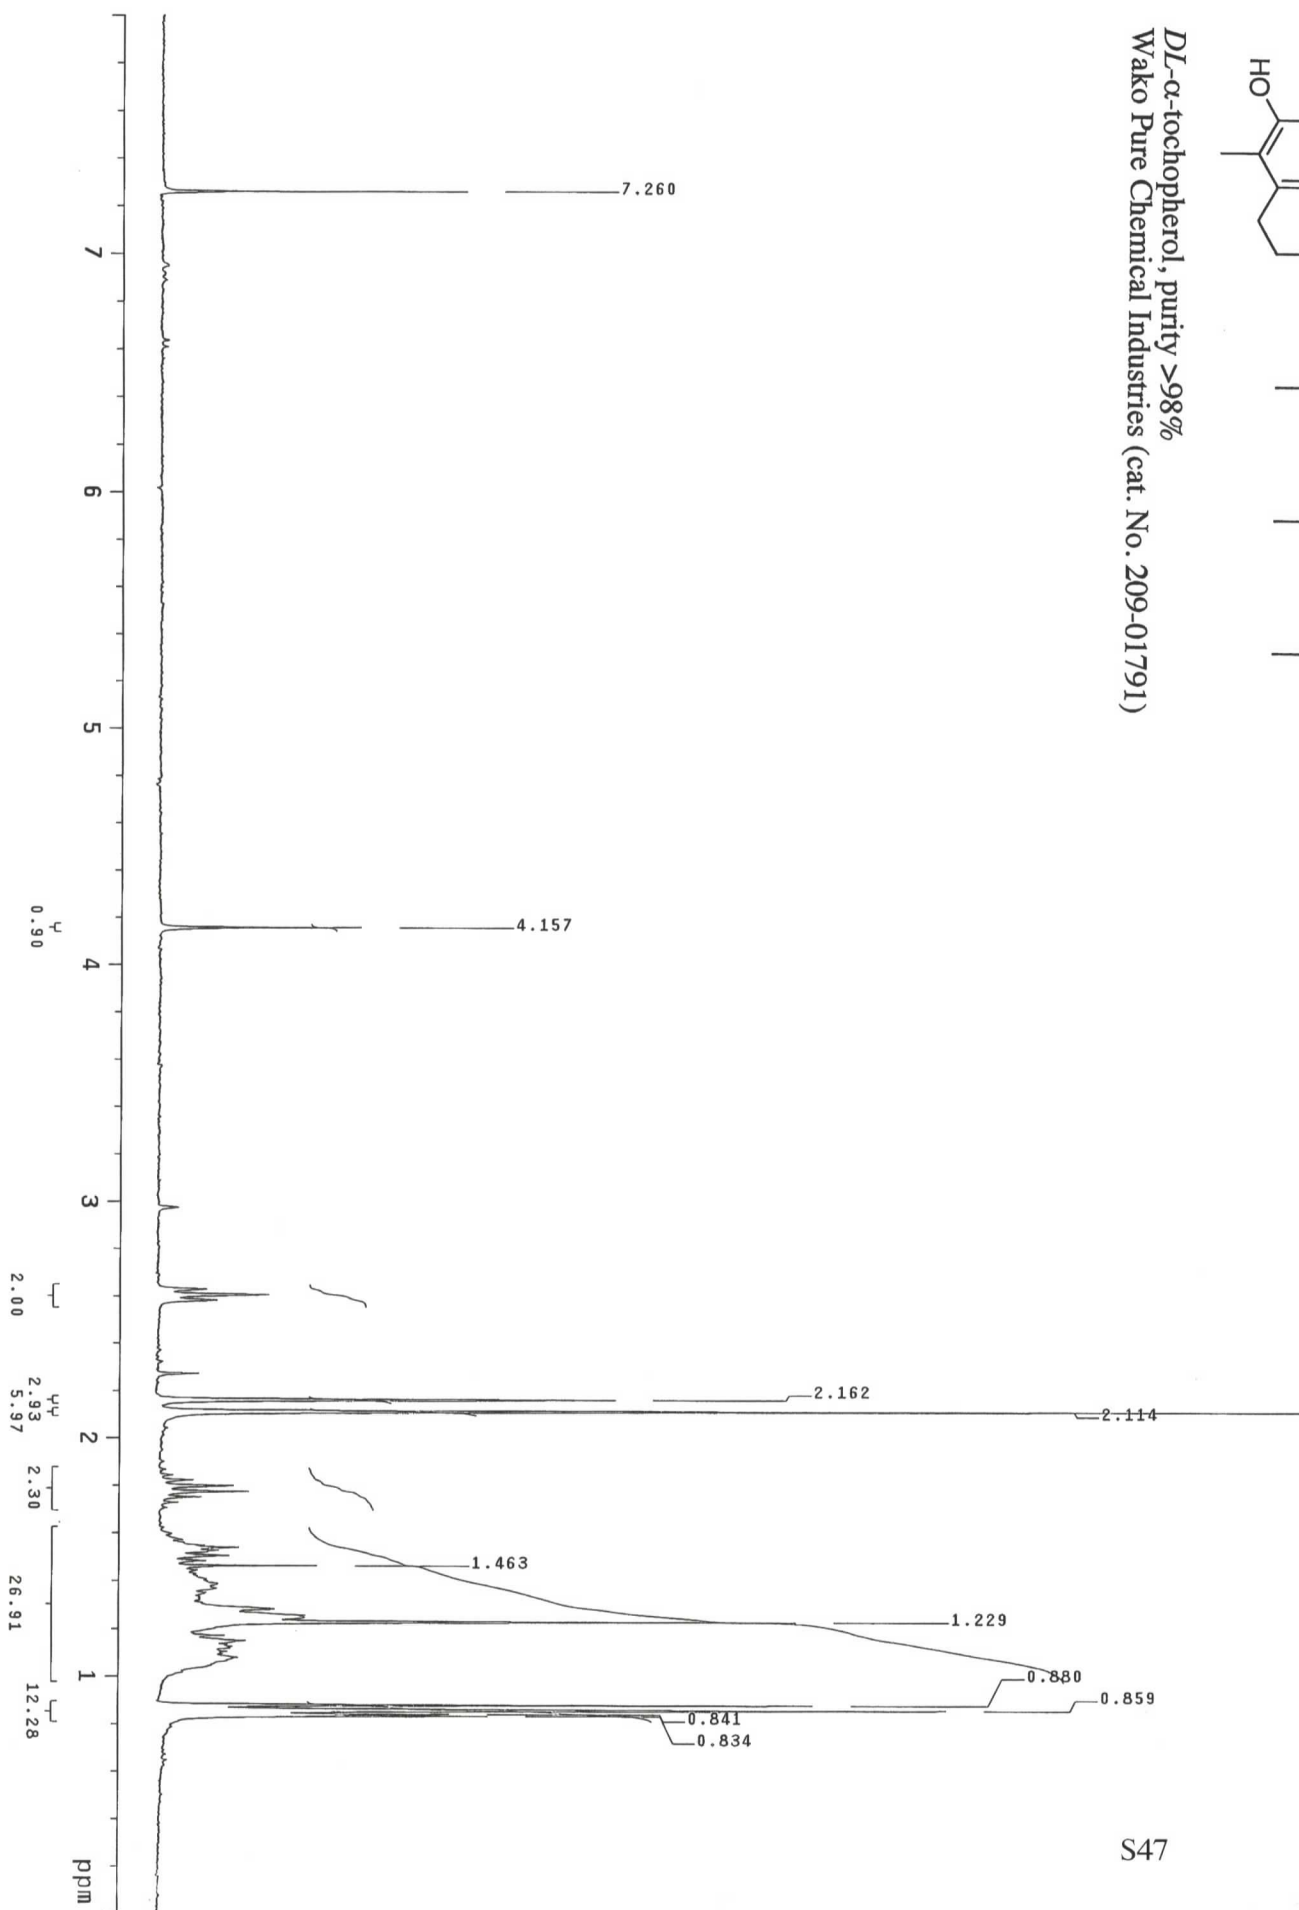

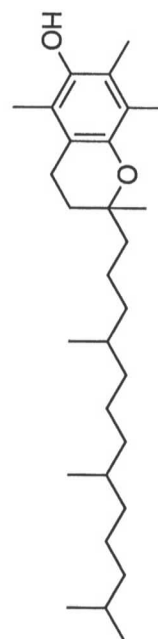

*DL*- $\alpha$ -tocopherol, purity >98%  
Wako Pure Chemical Industries (cat. No. 209-01791)

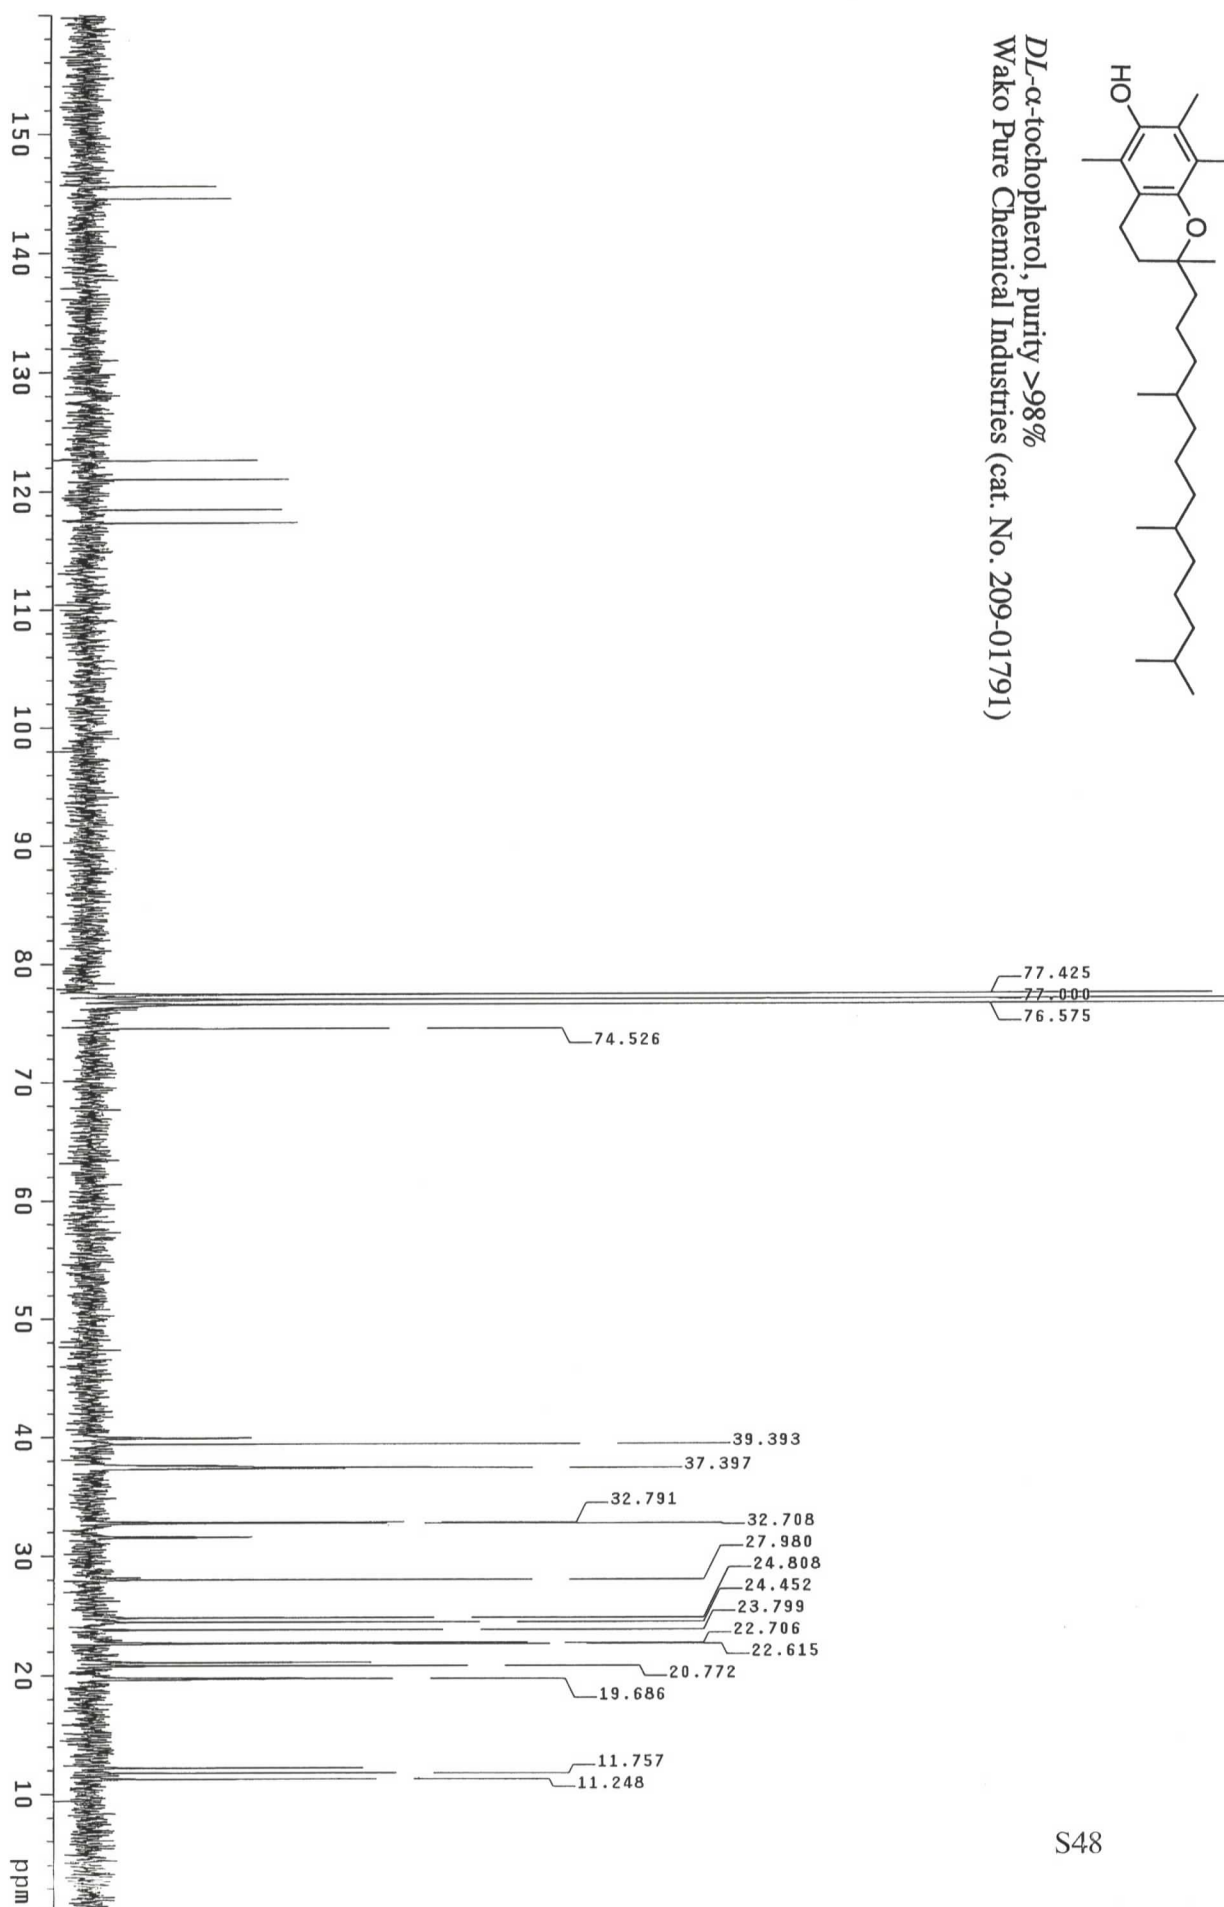

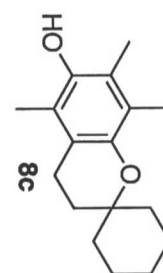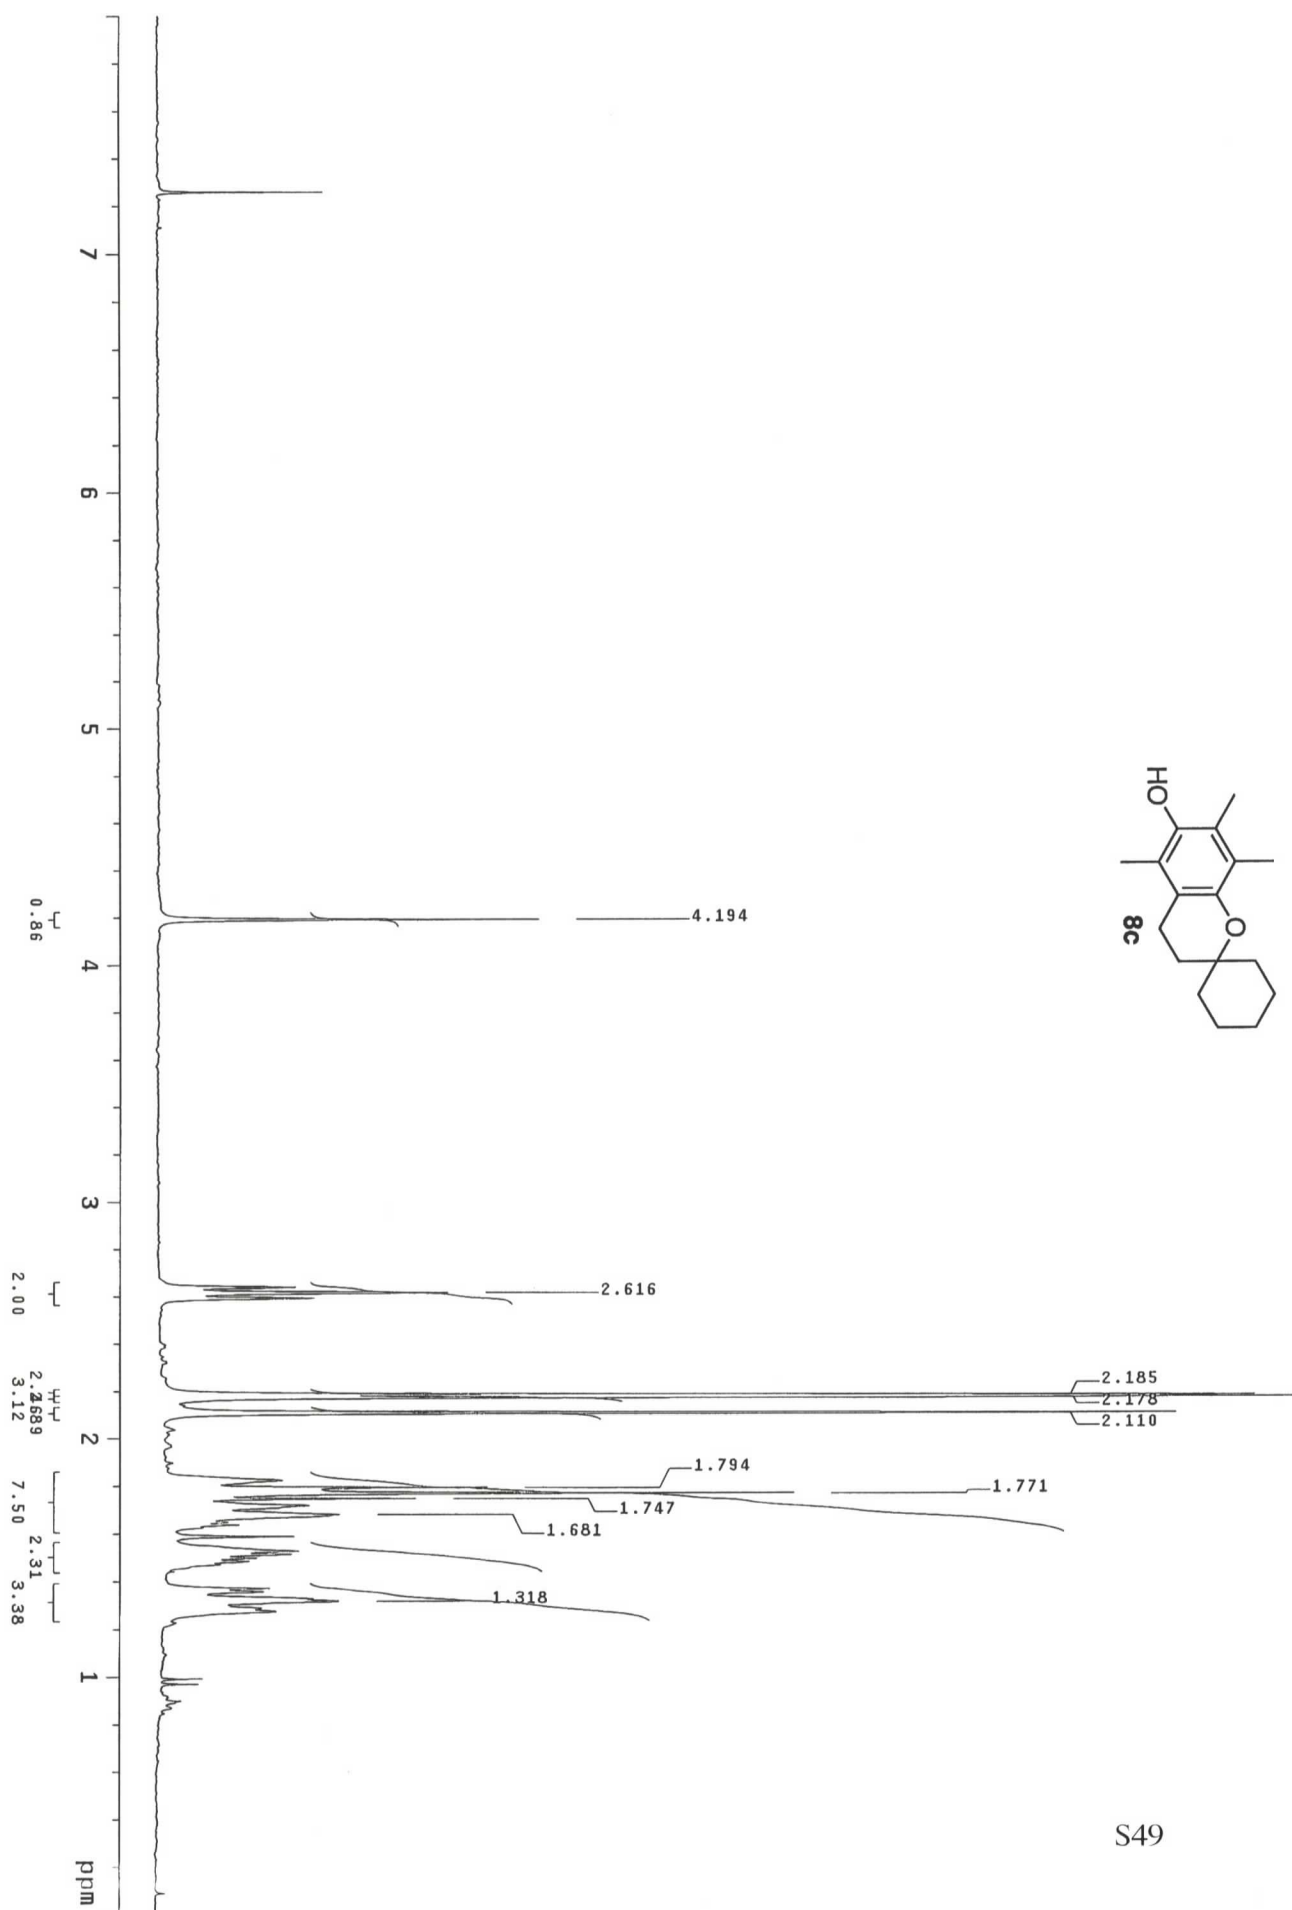

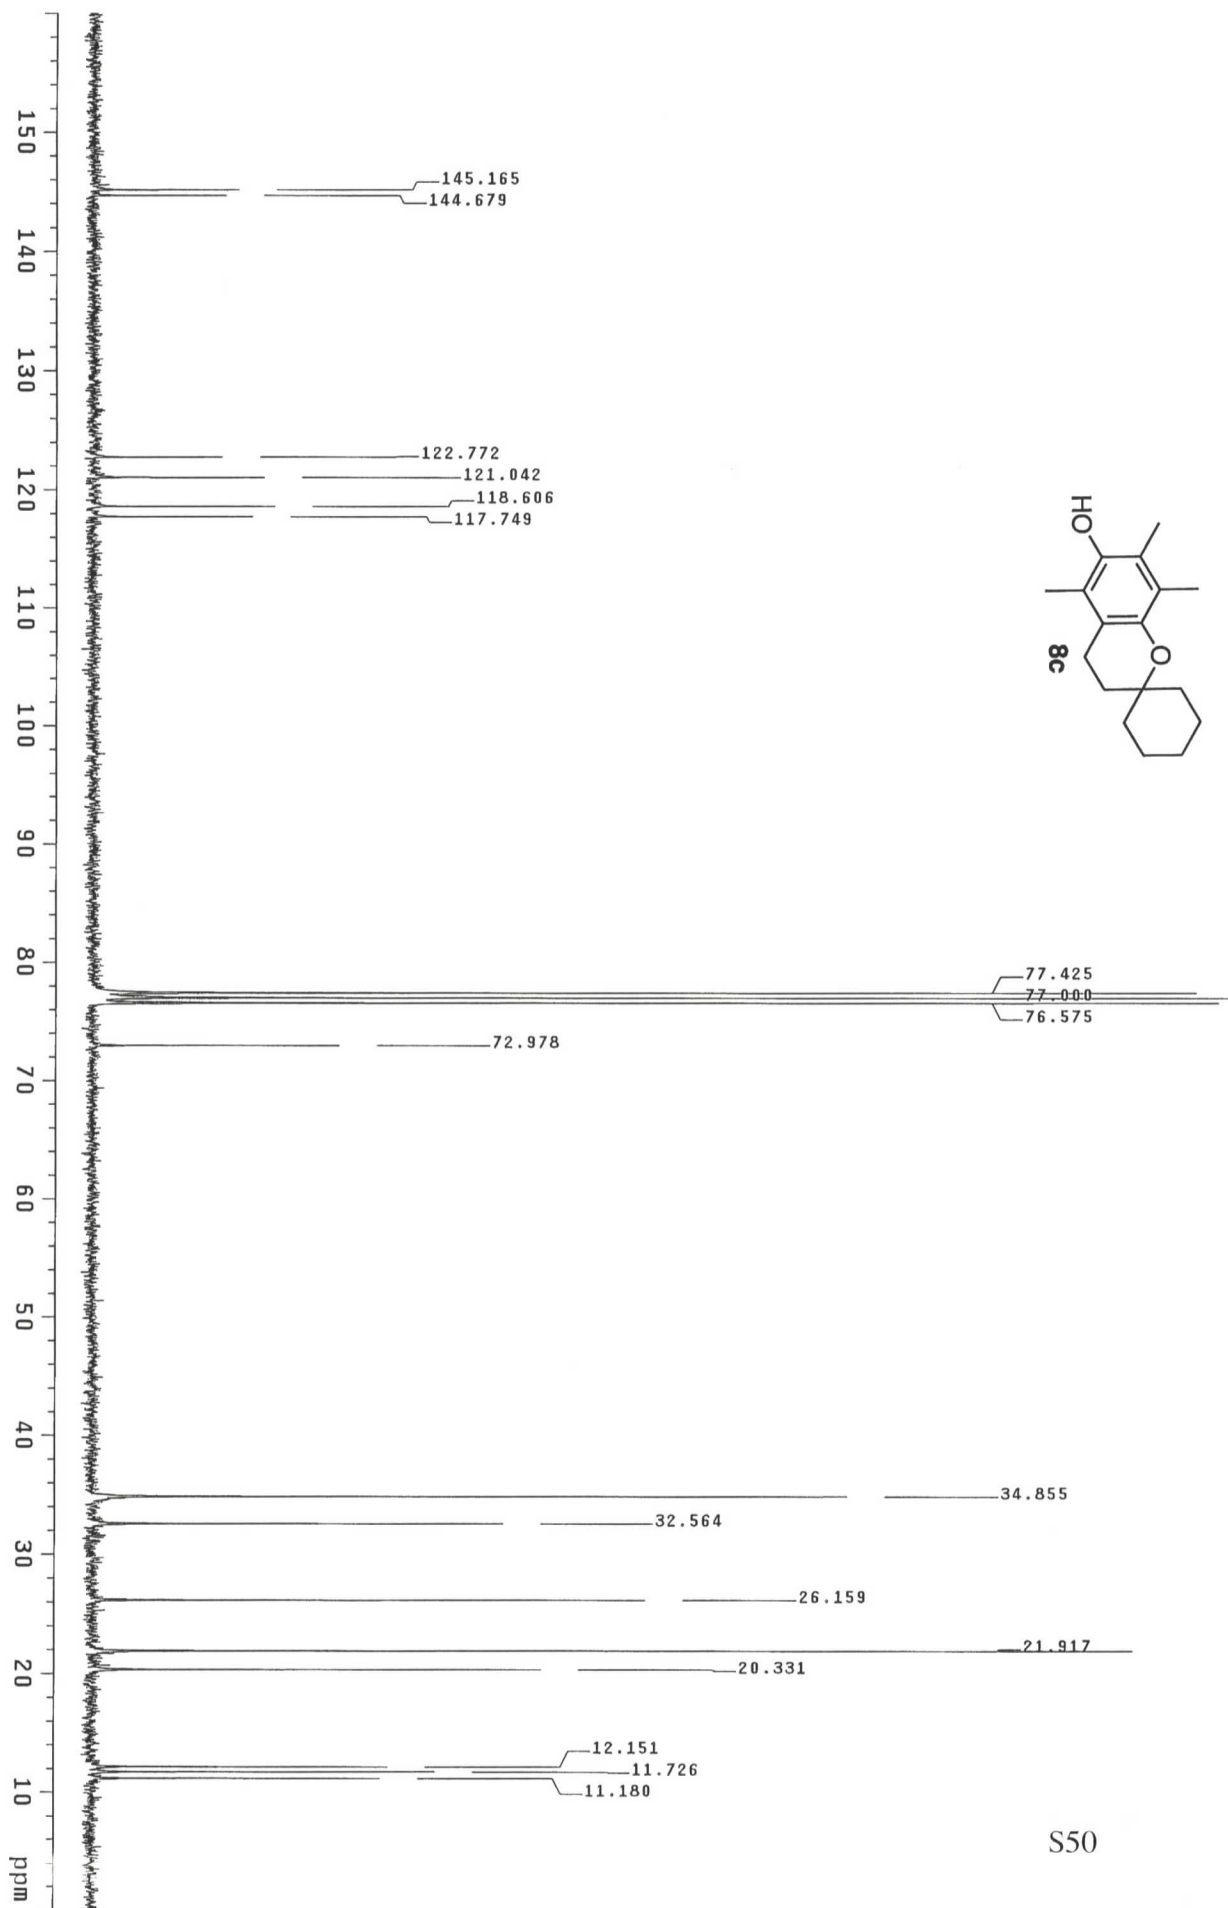

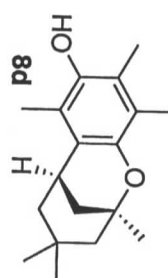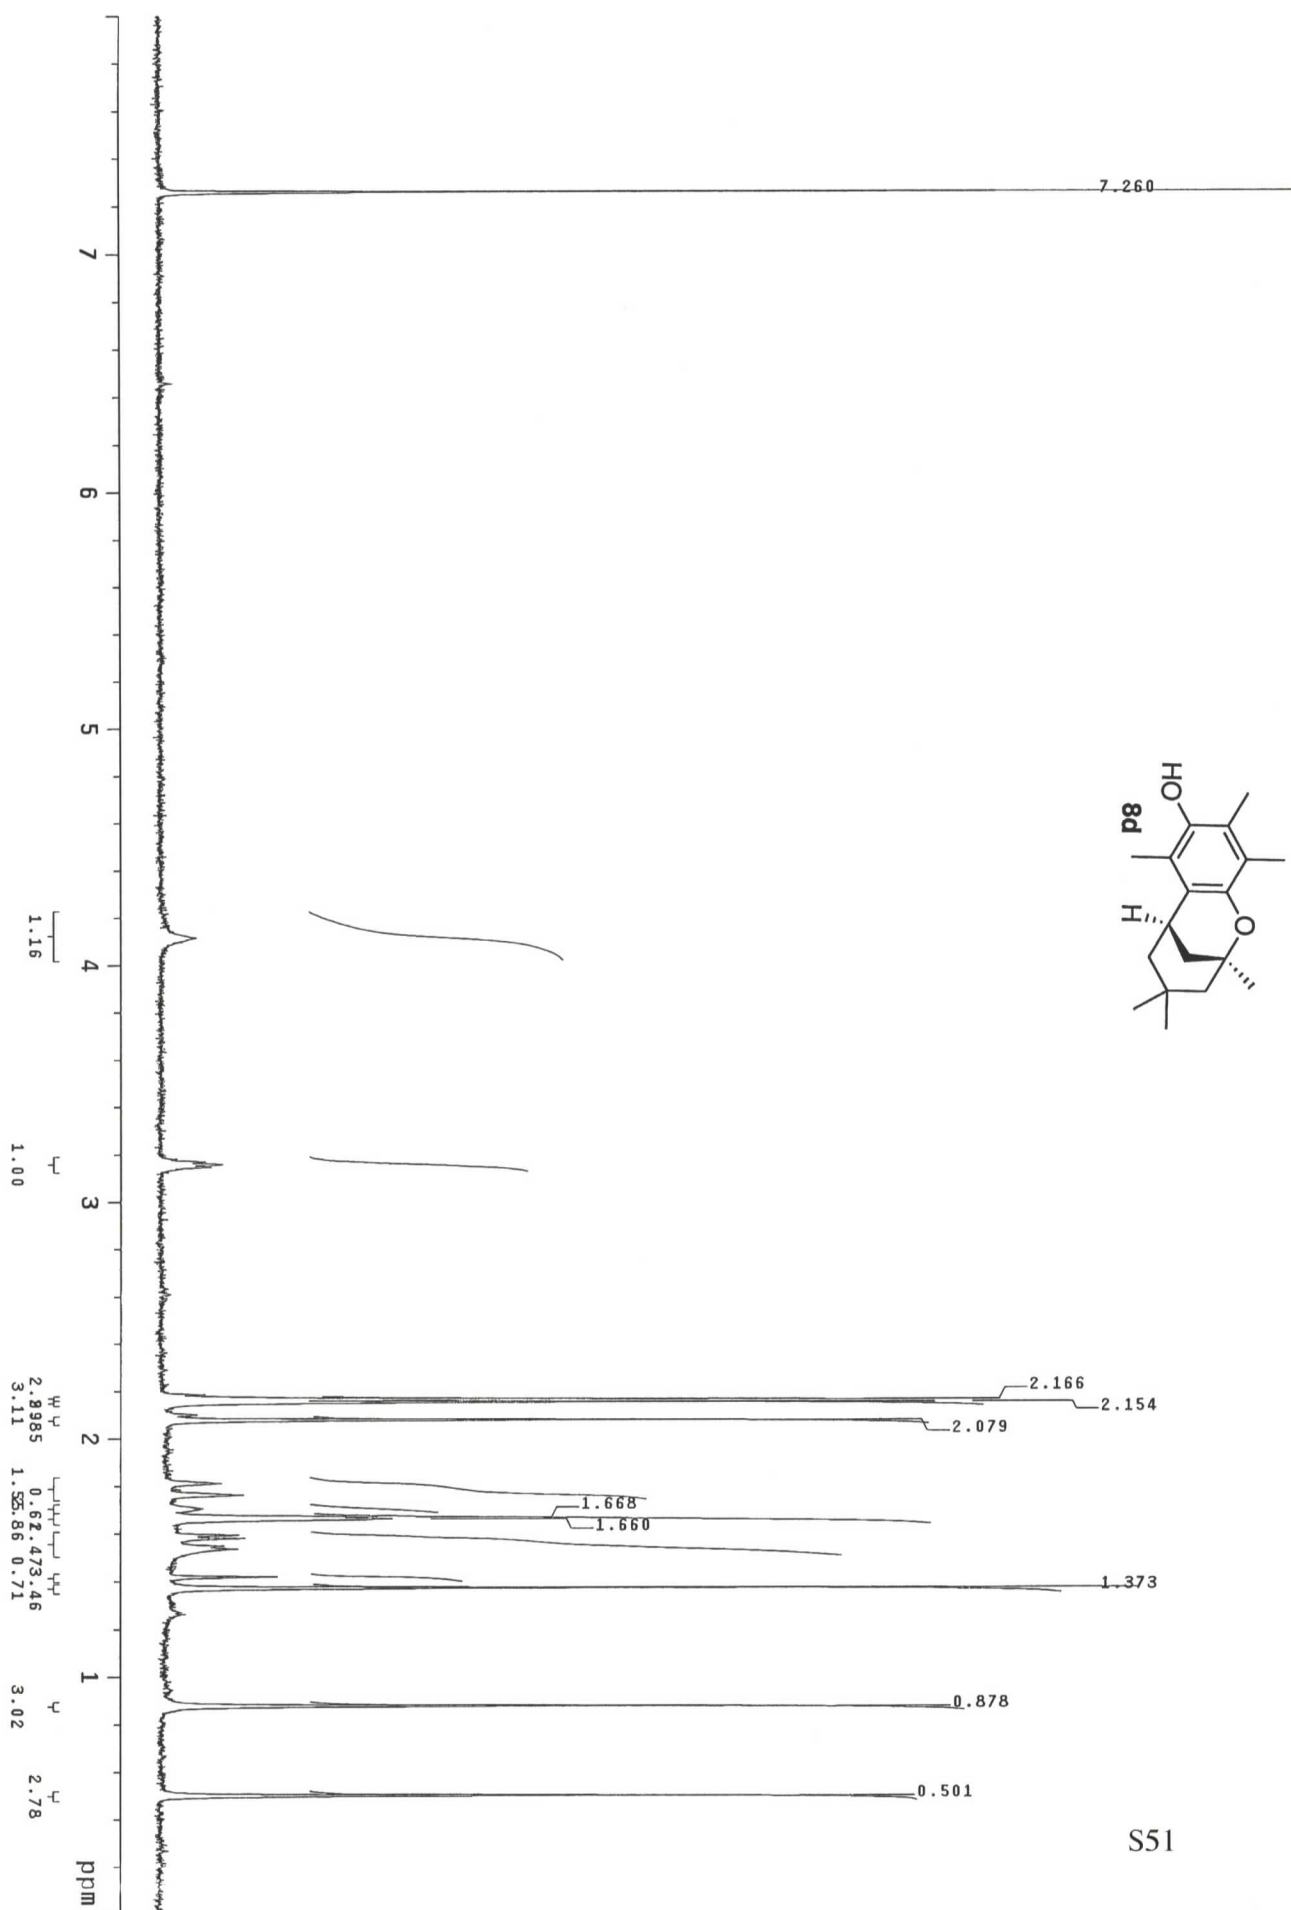

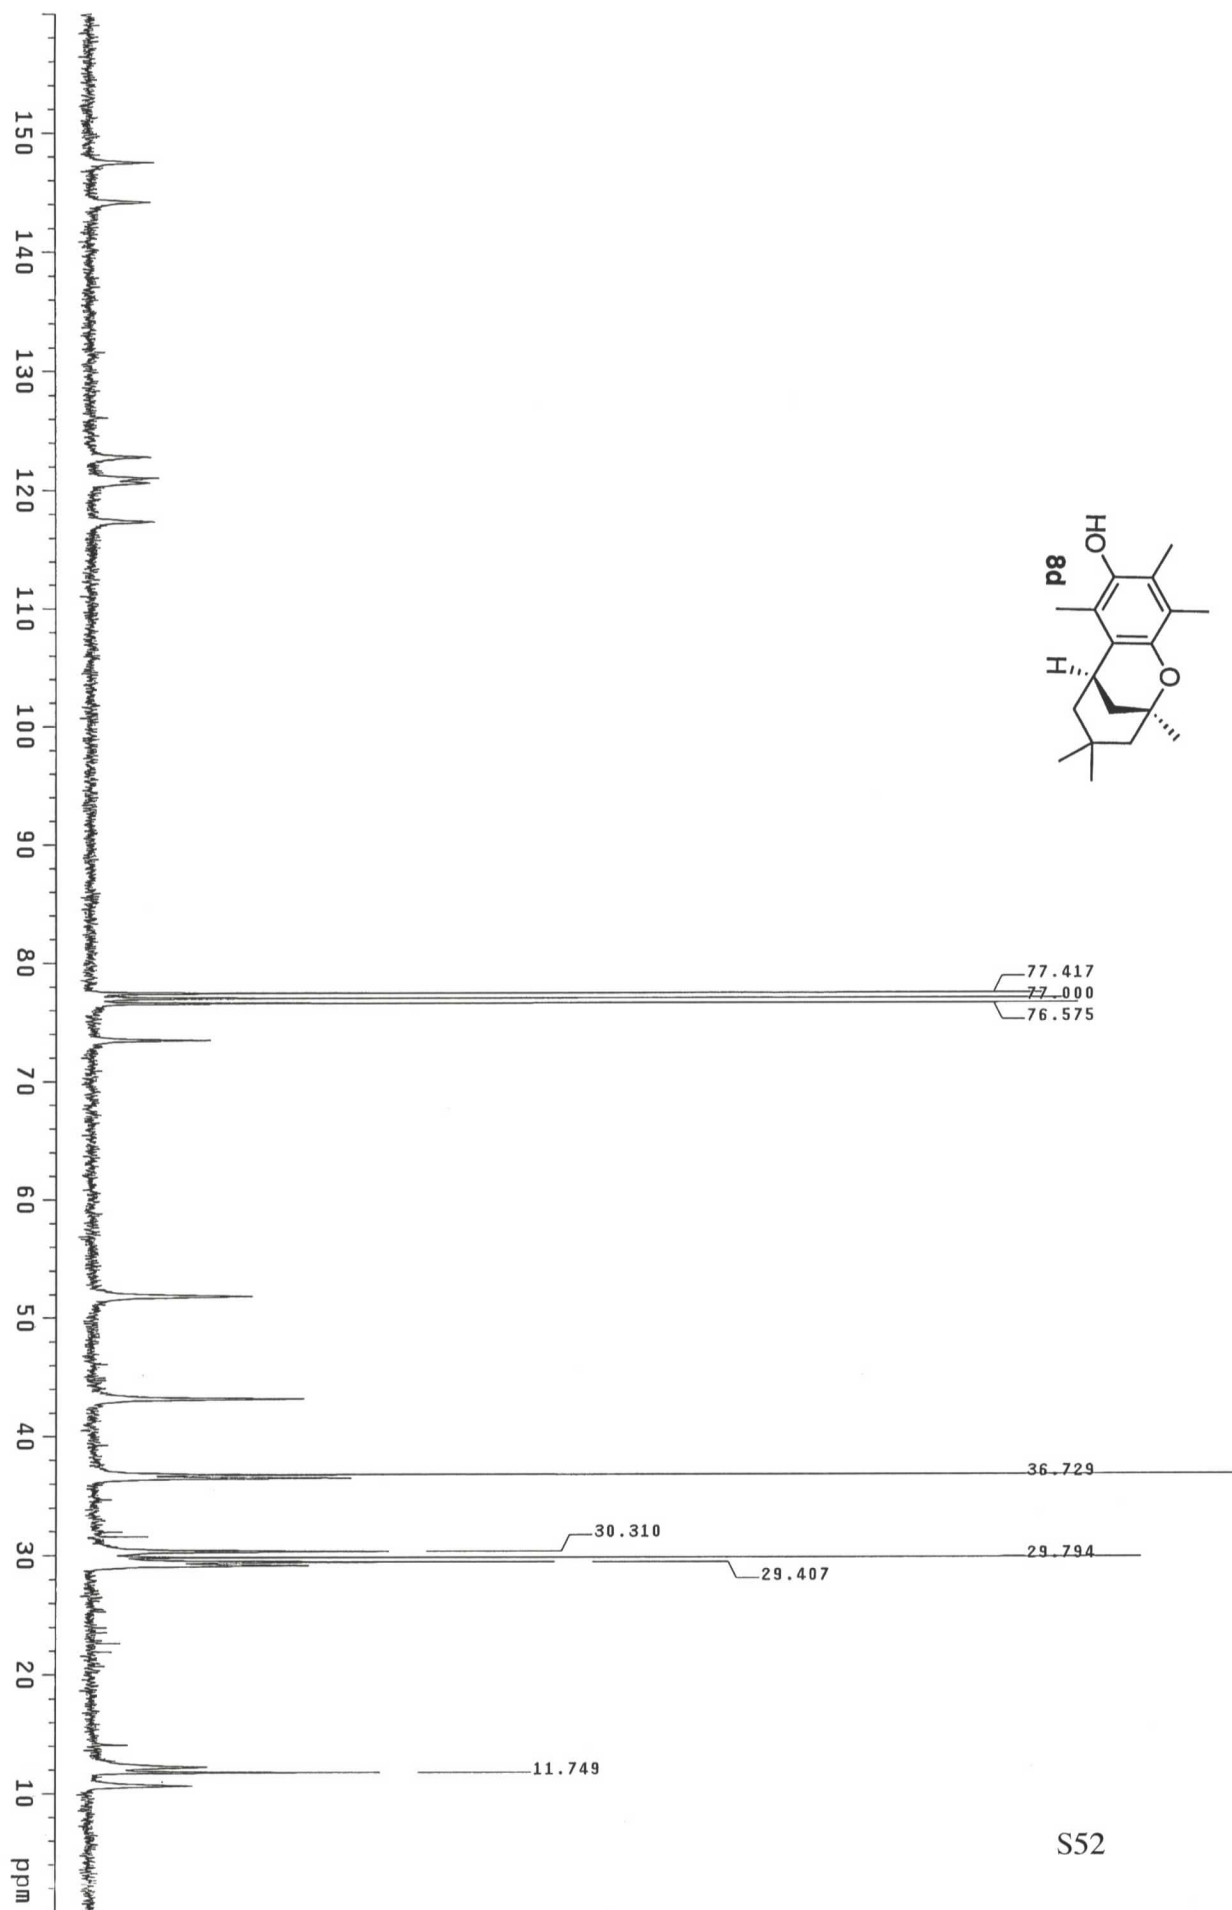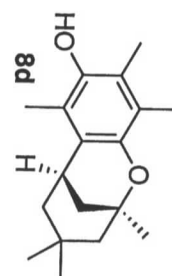

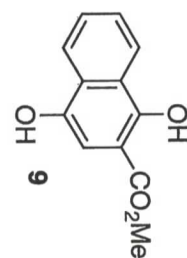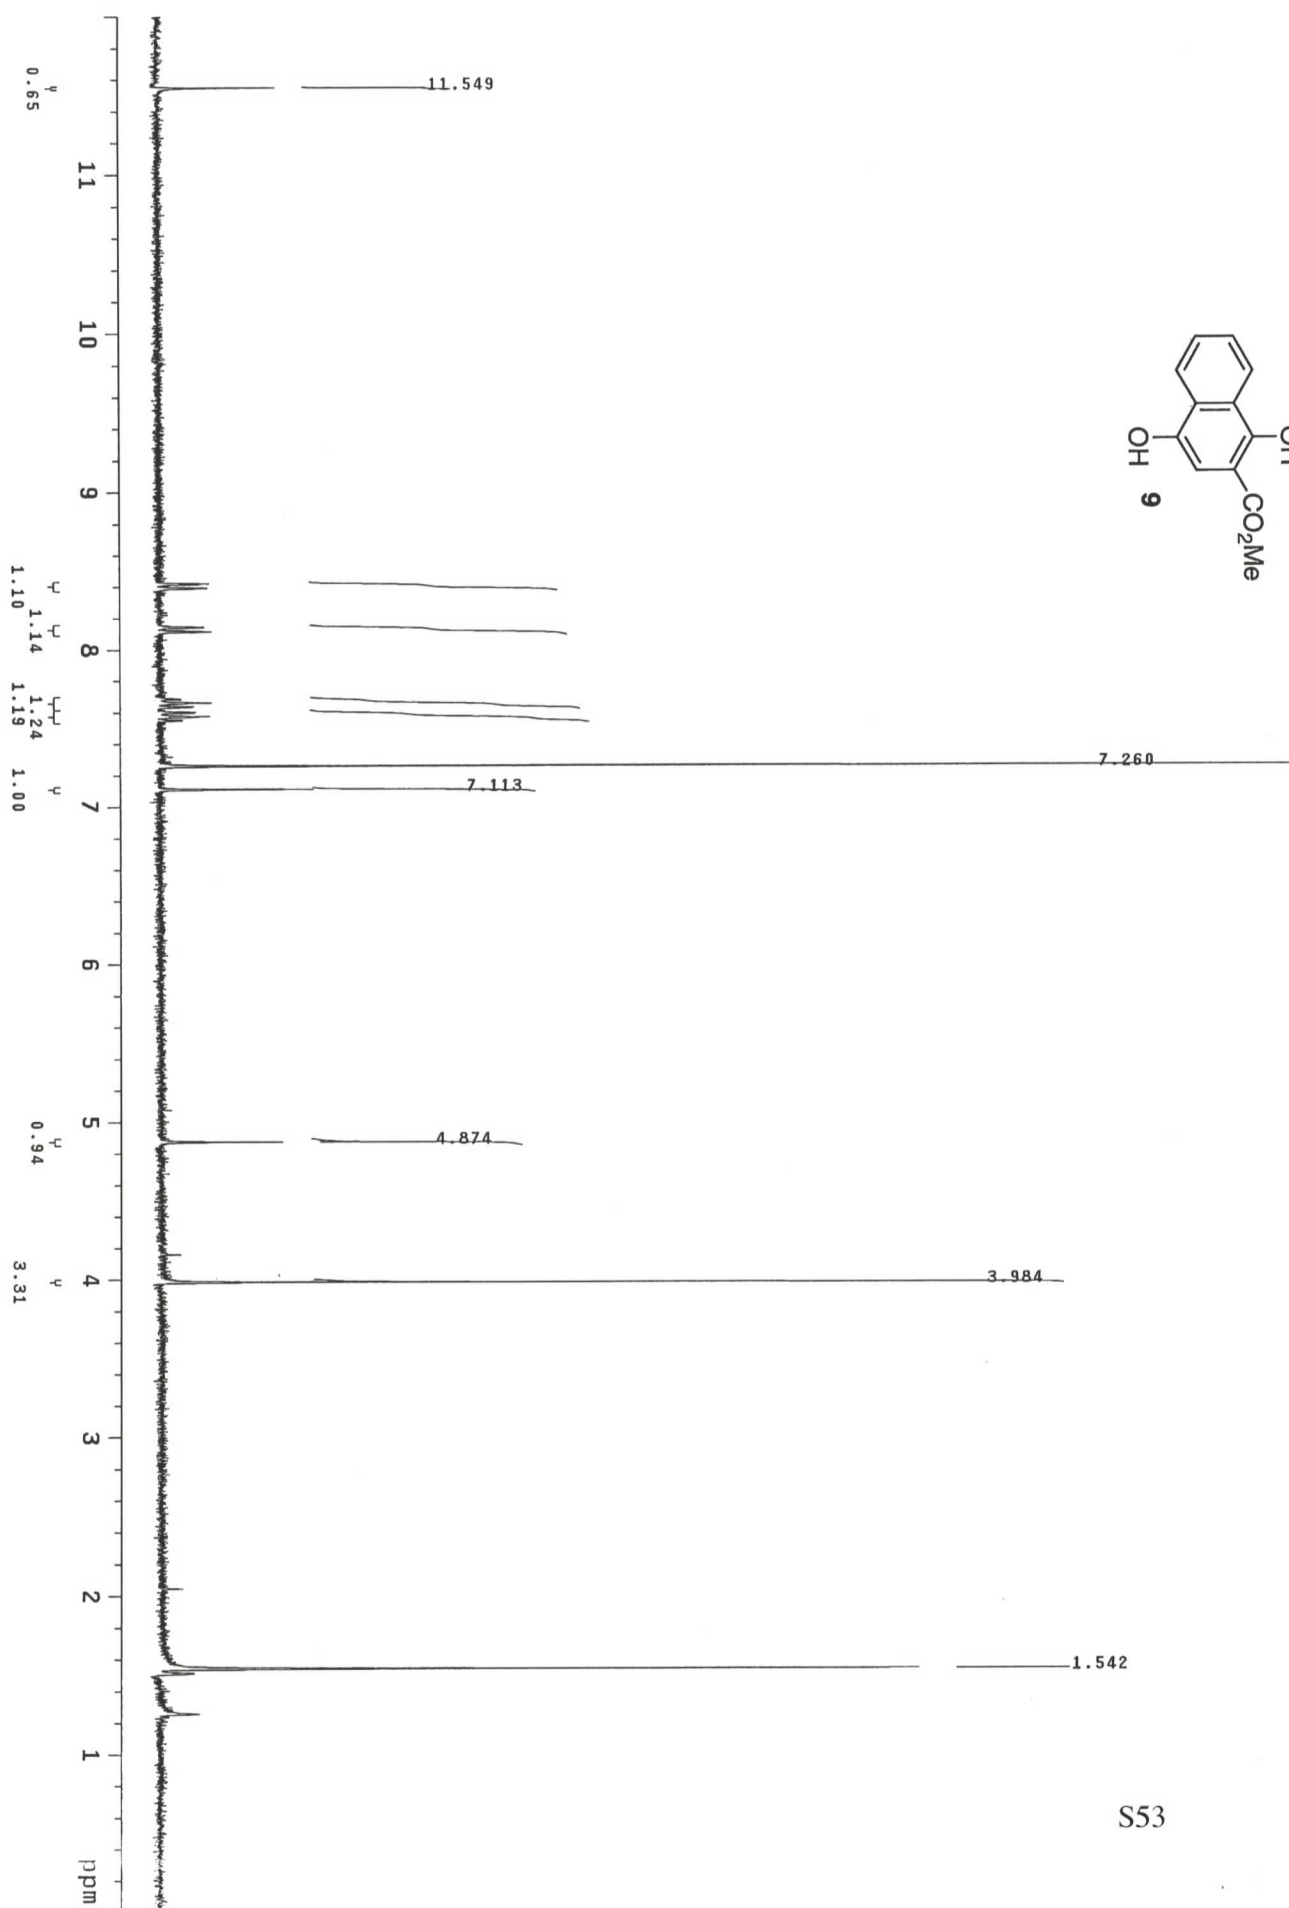



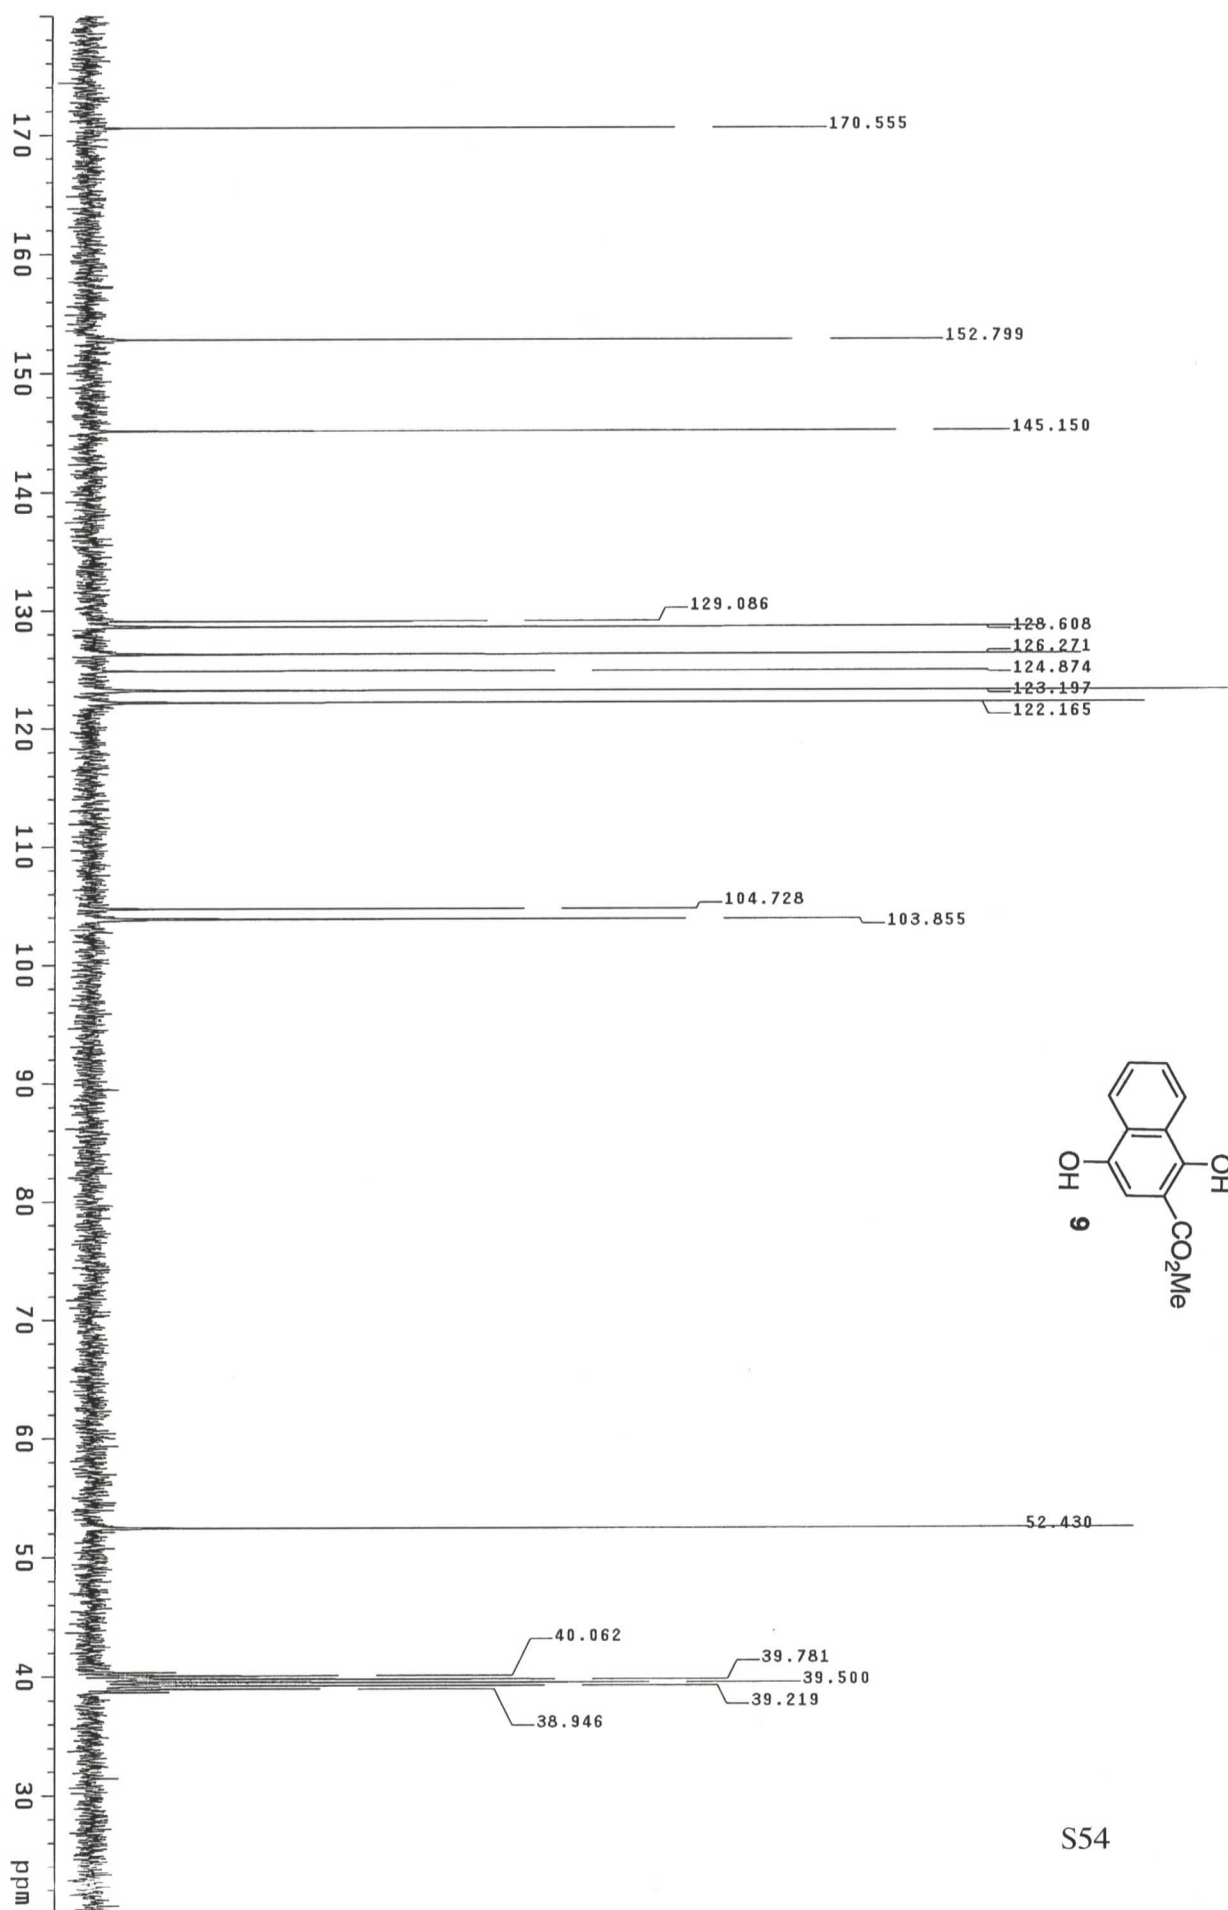

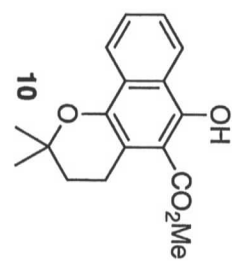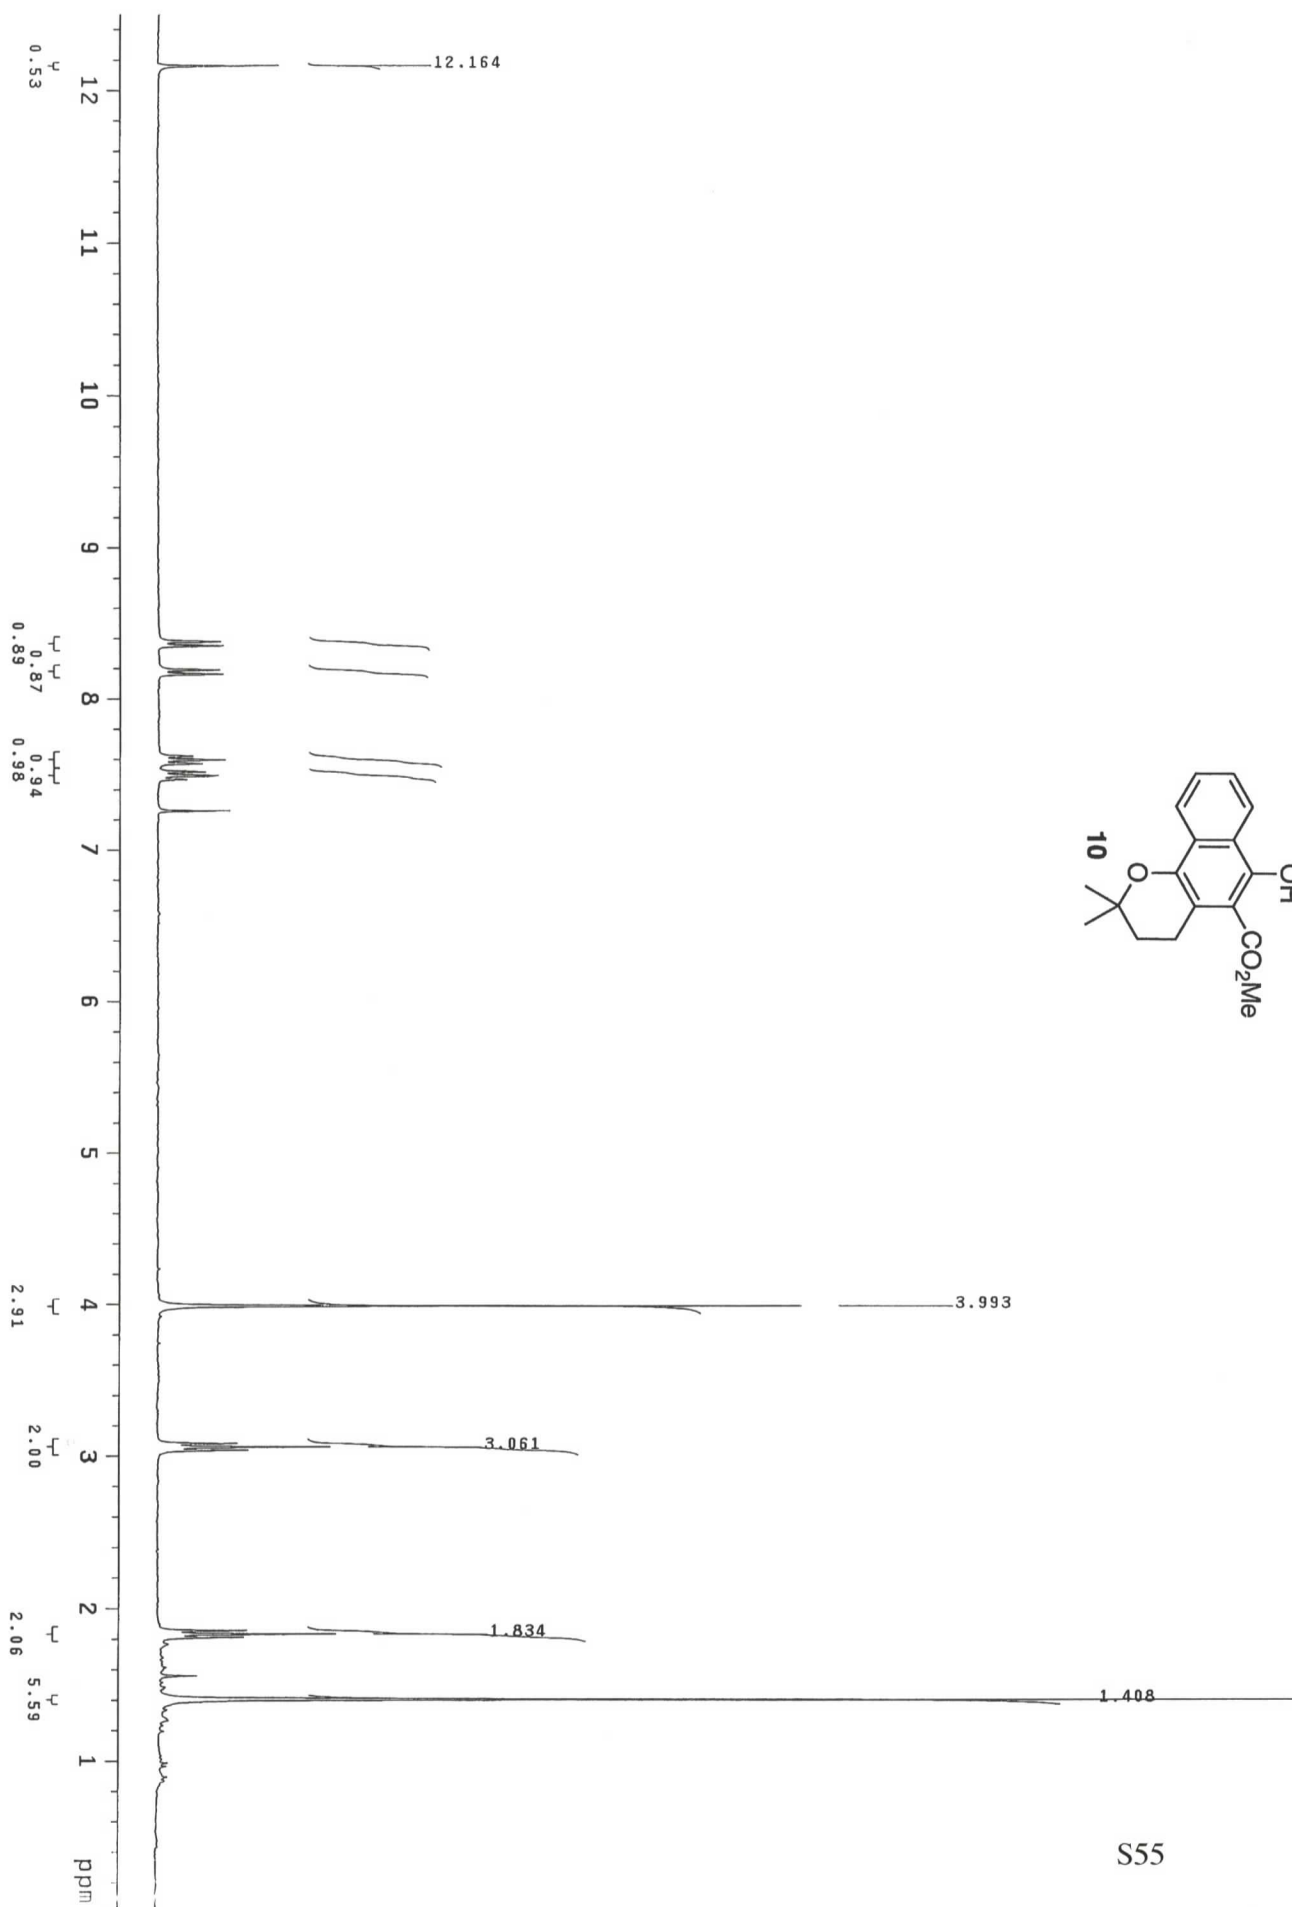

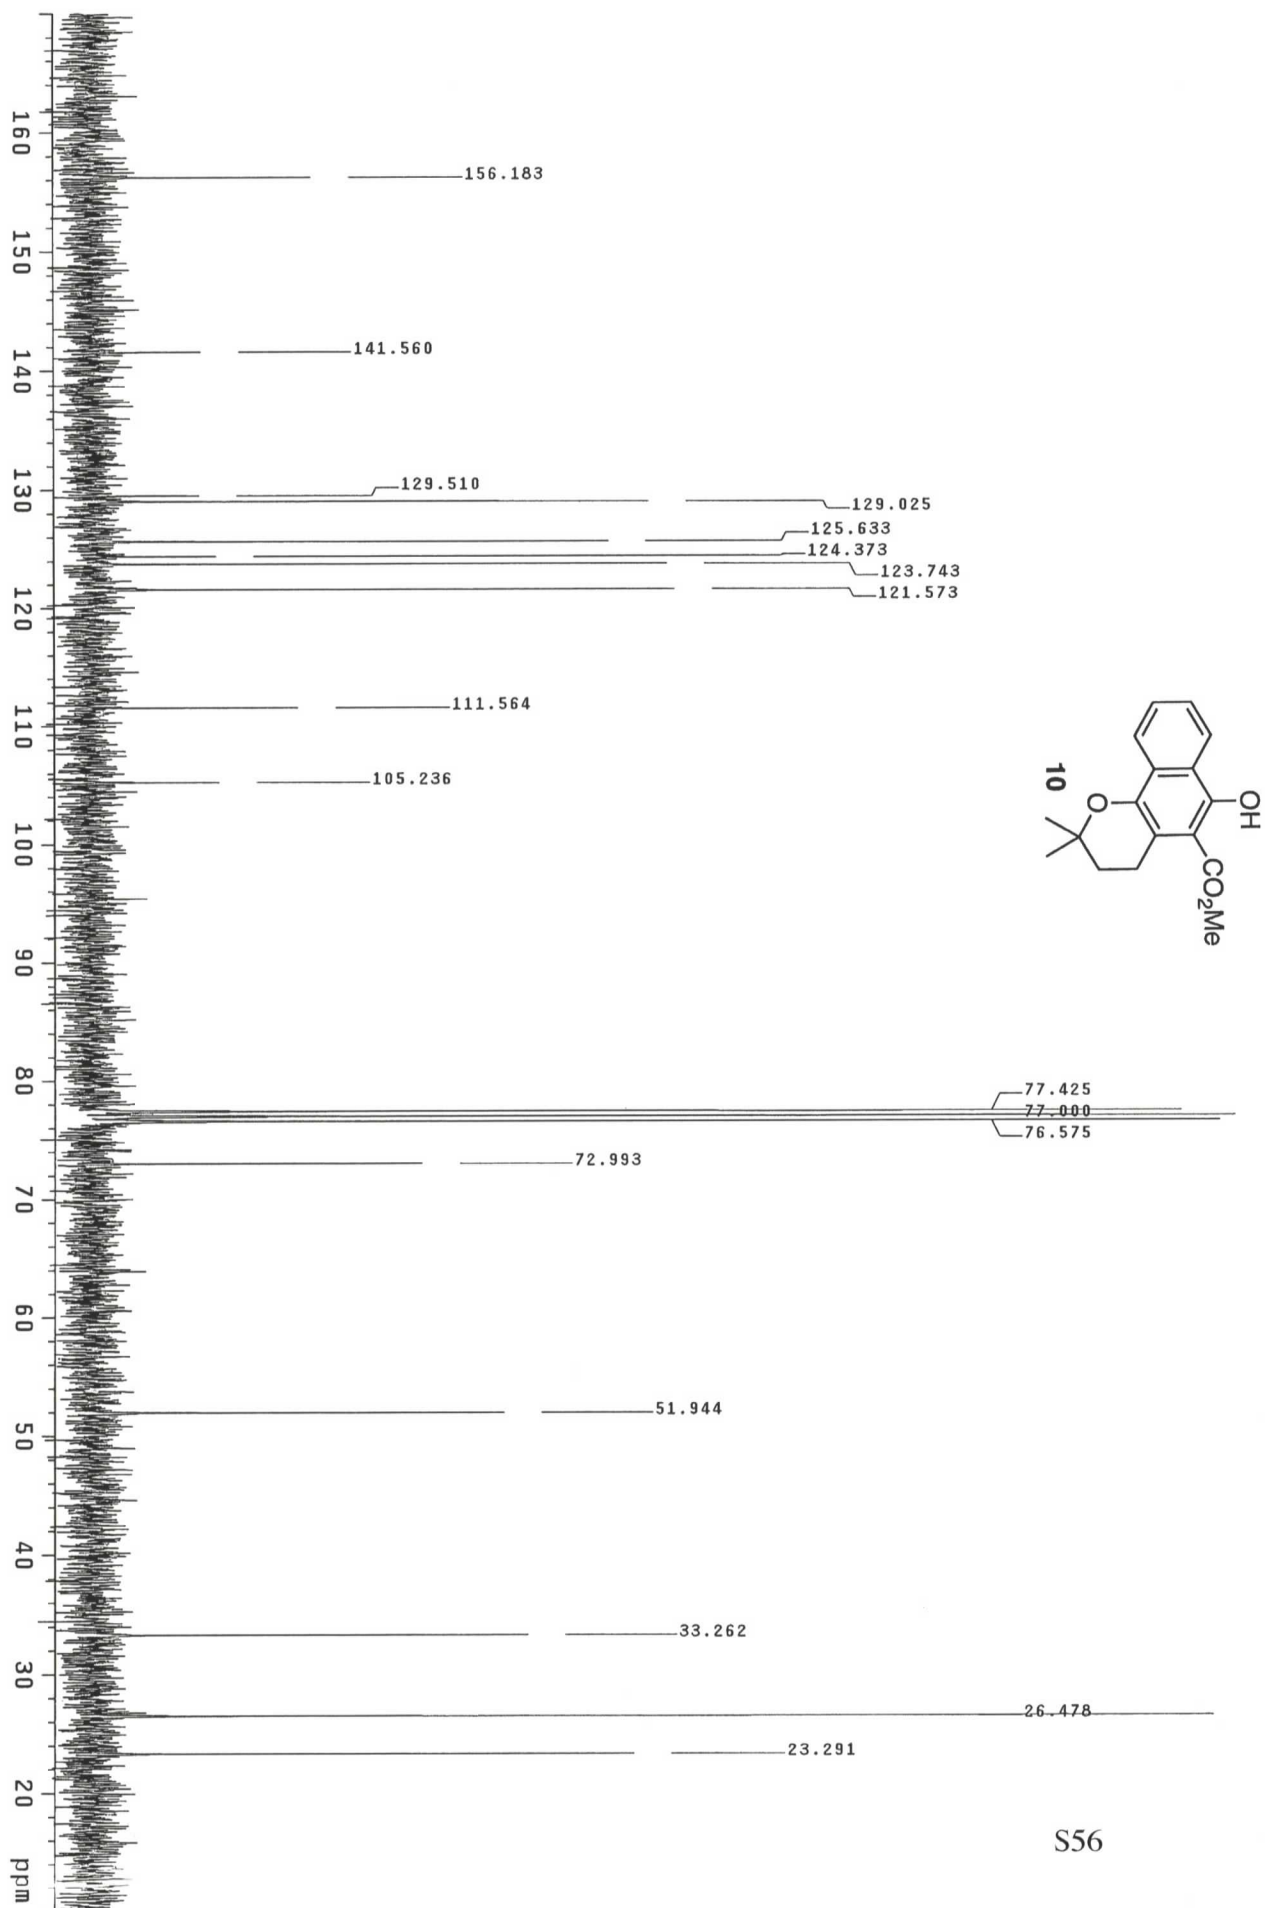

S56

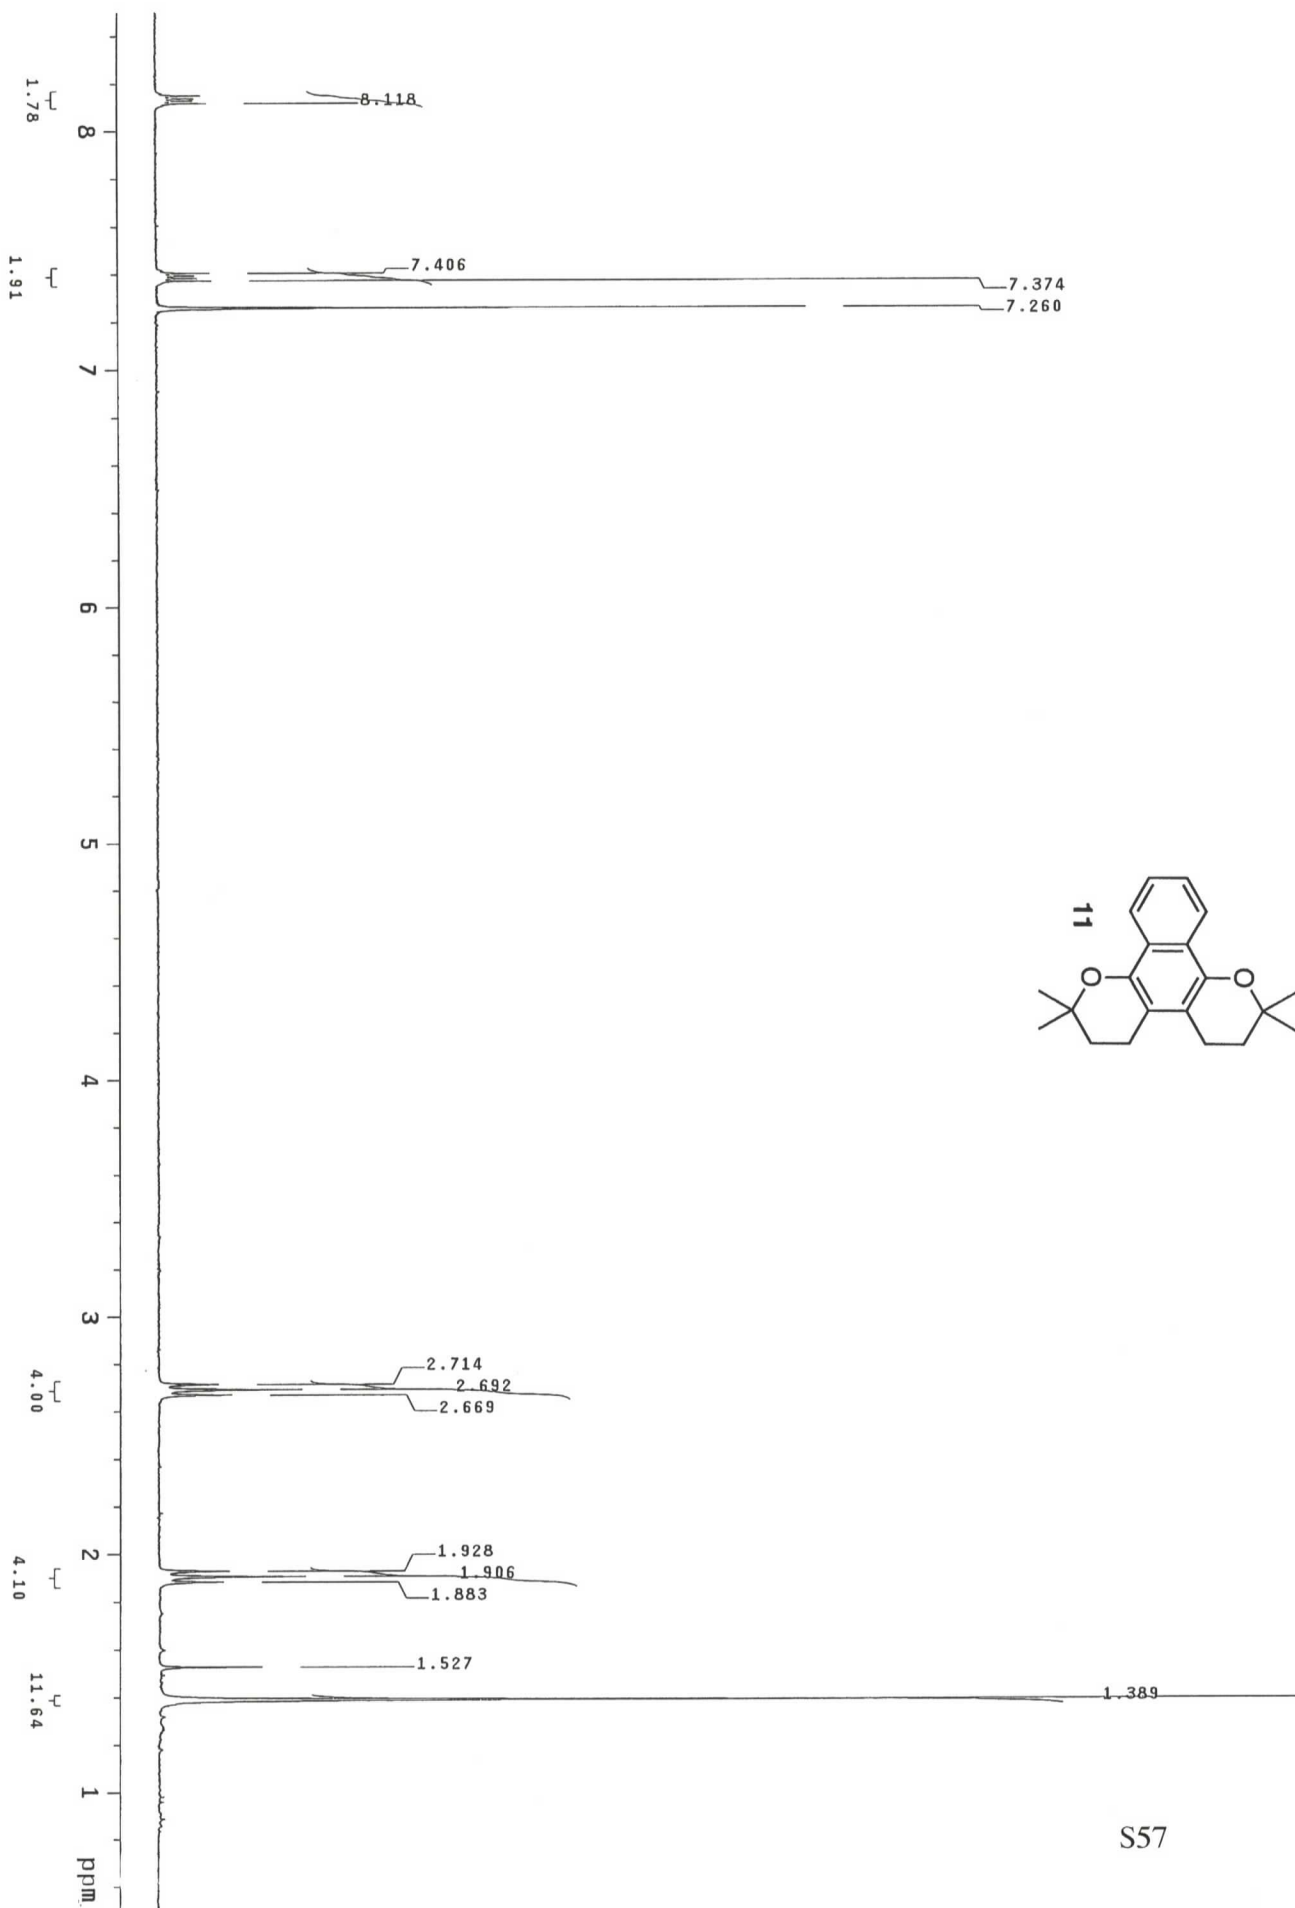

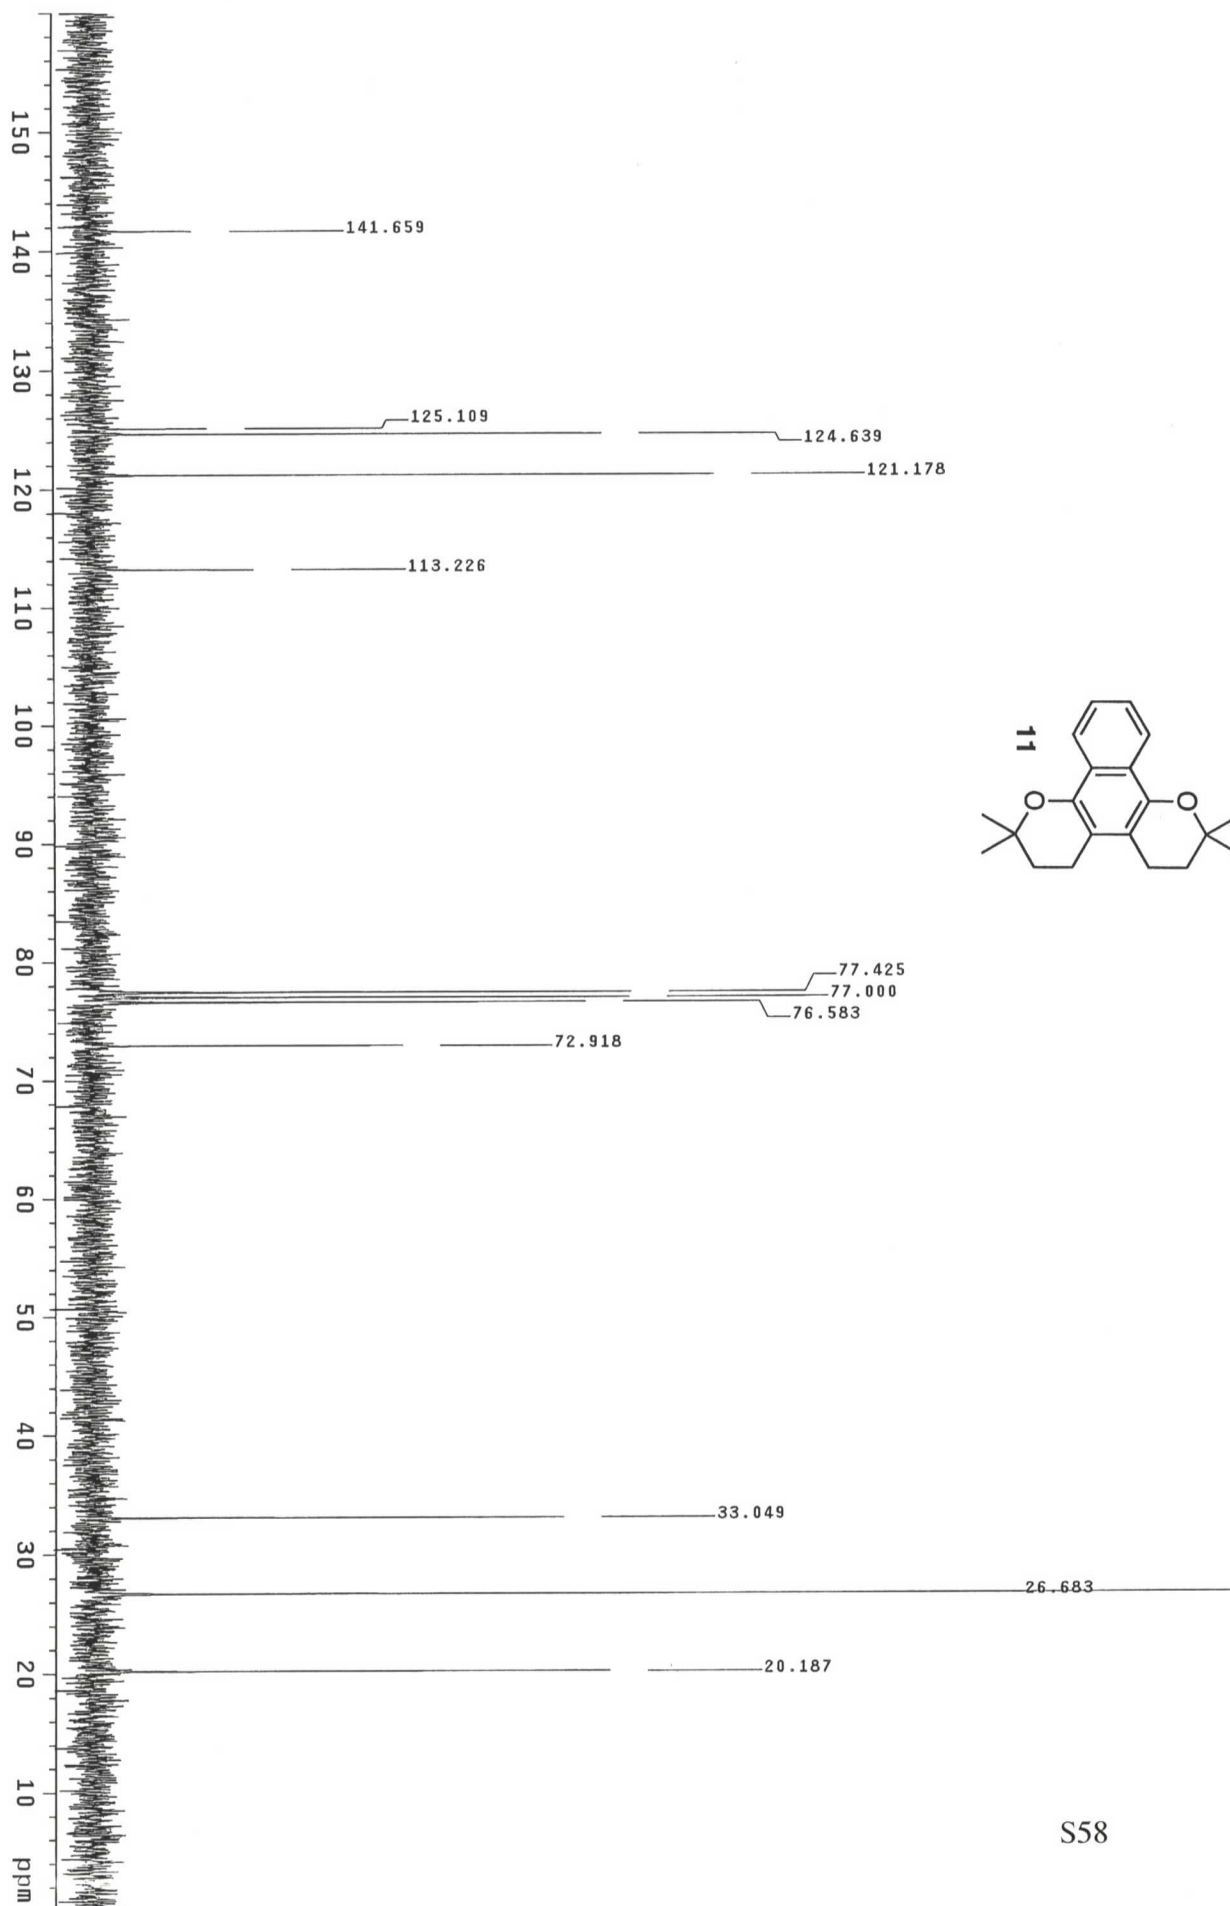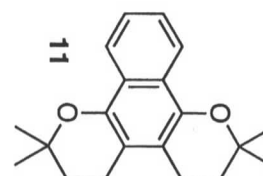

Temperature-Time Profile 1

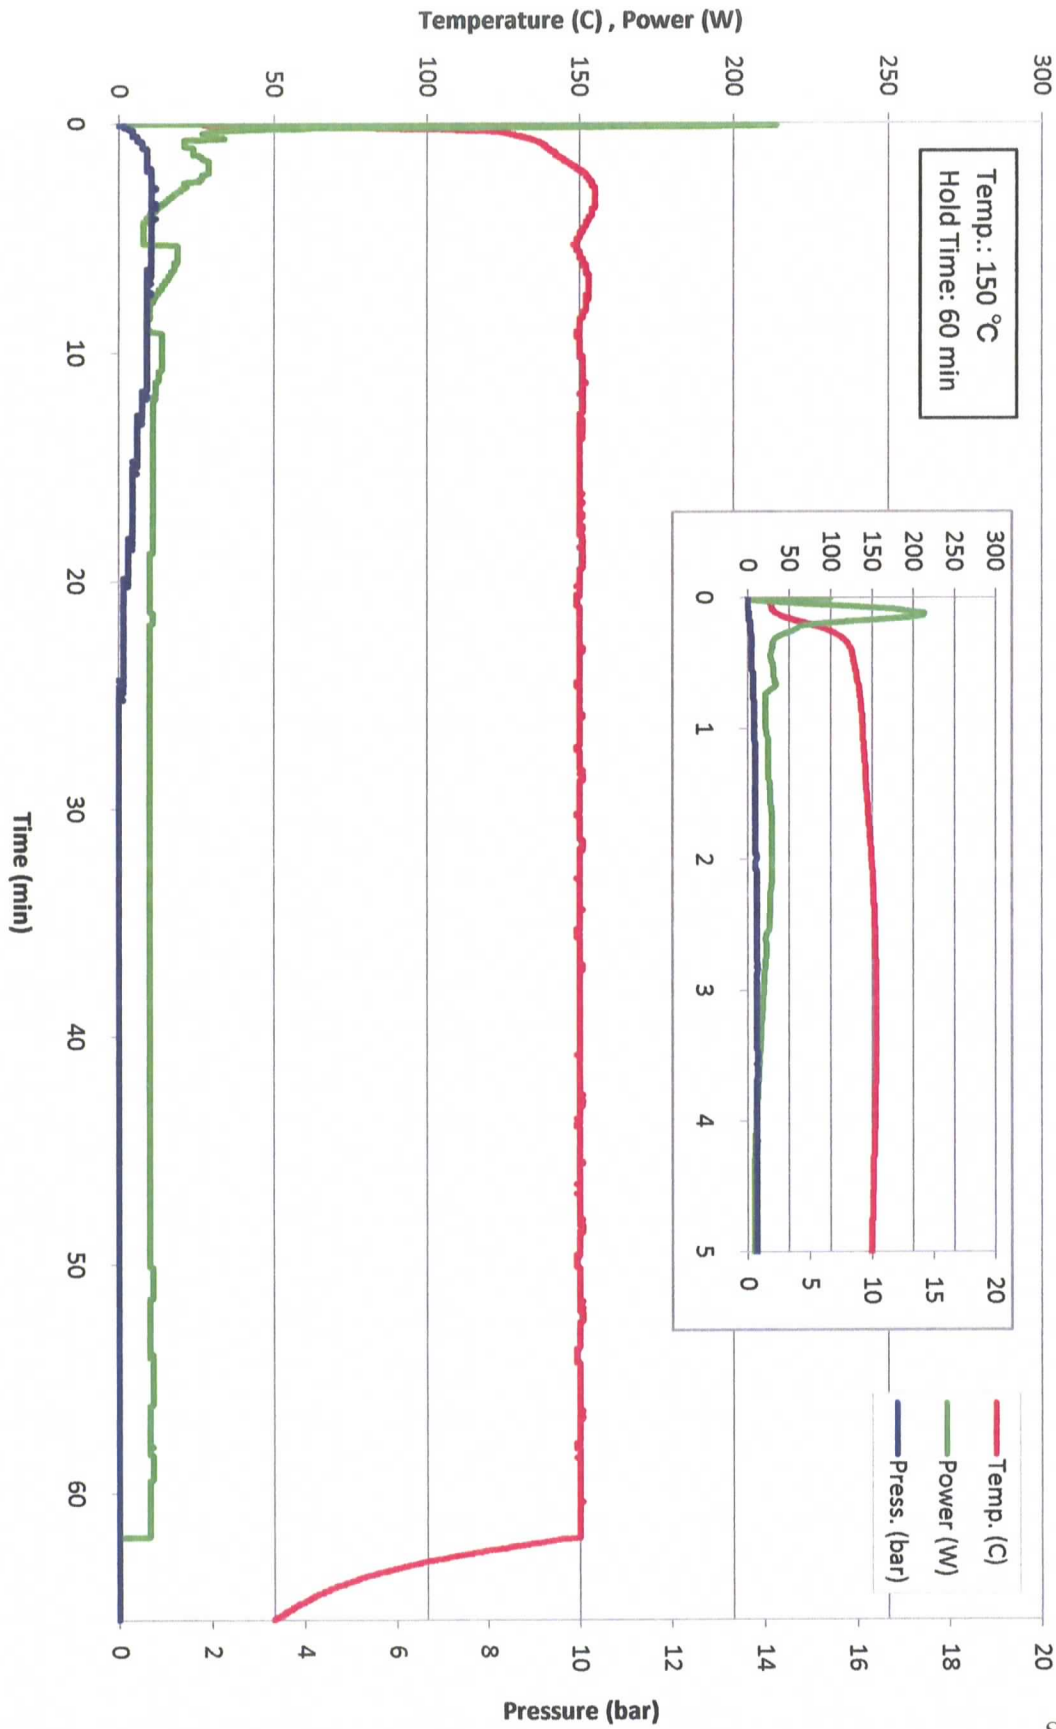

Temperature-Time Profile 2

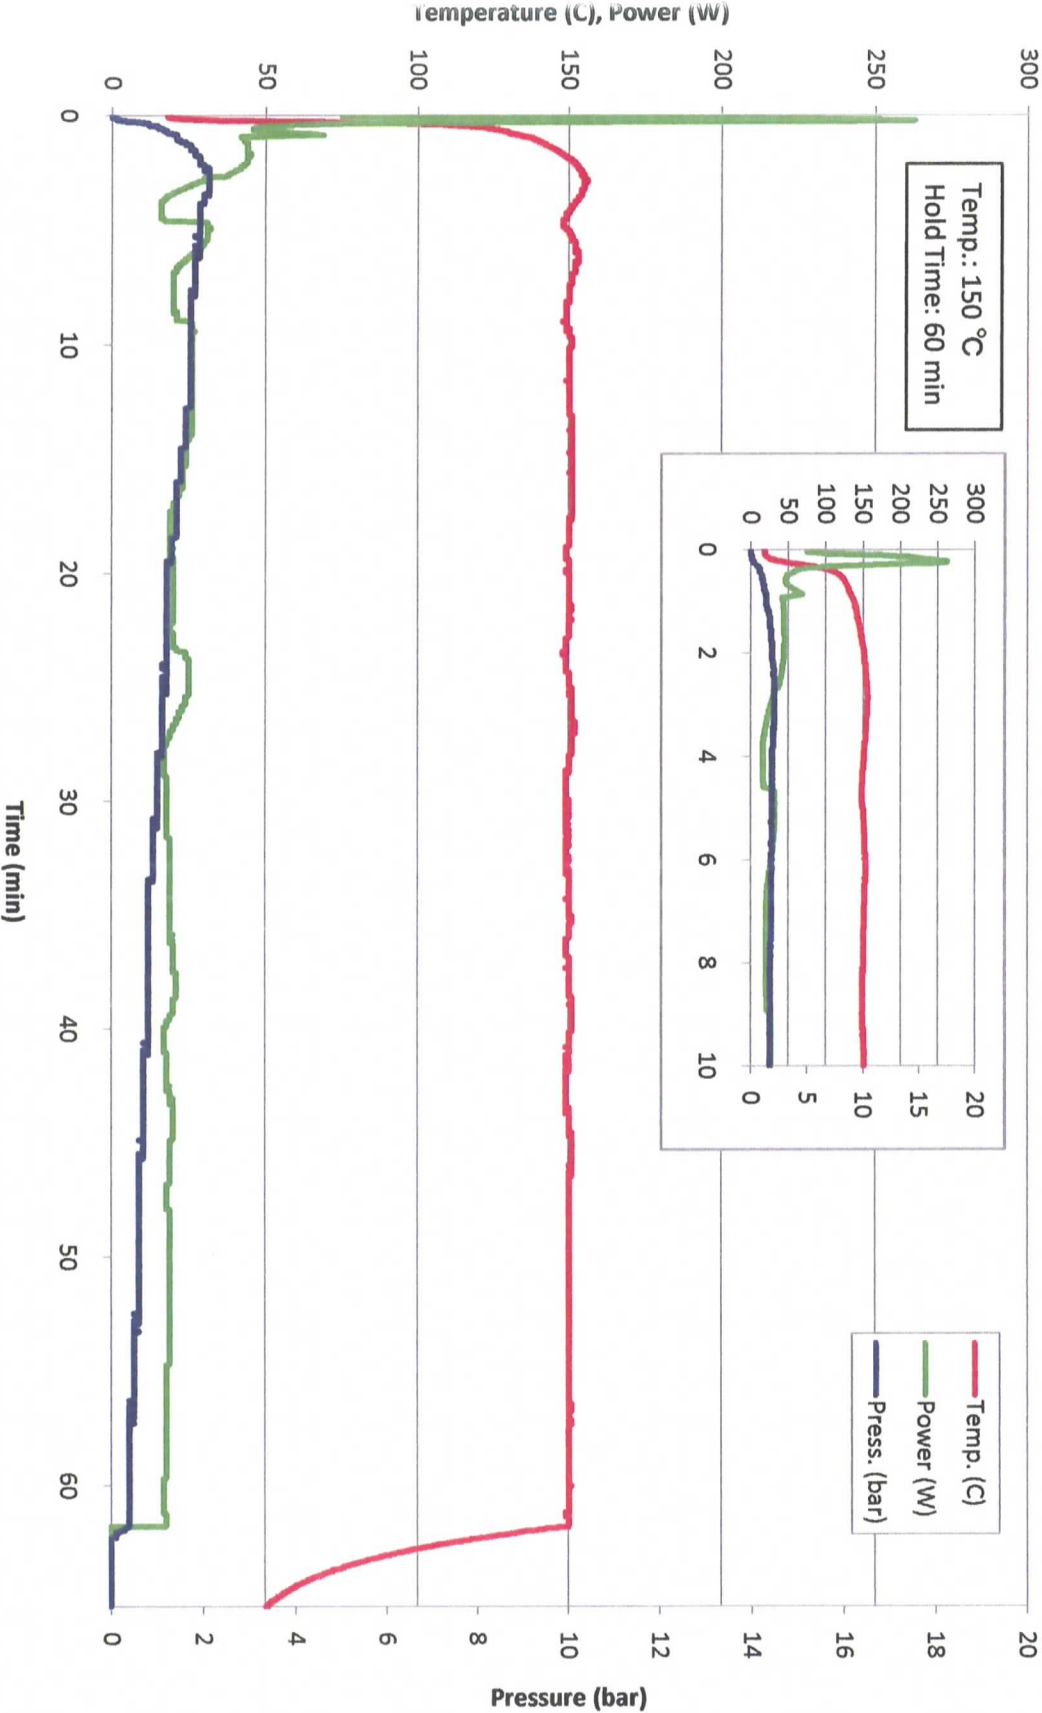

Temperature-Time Profile 3

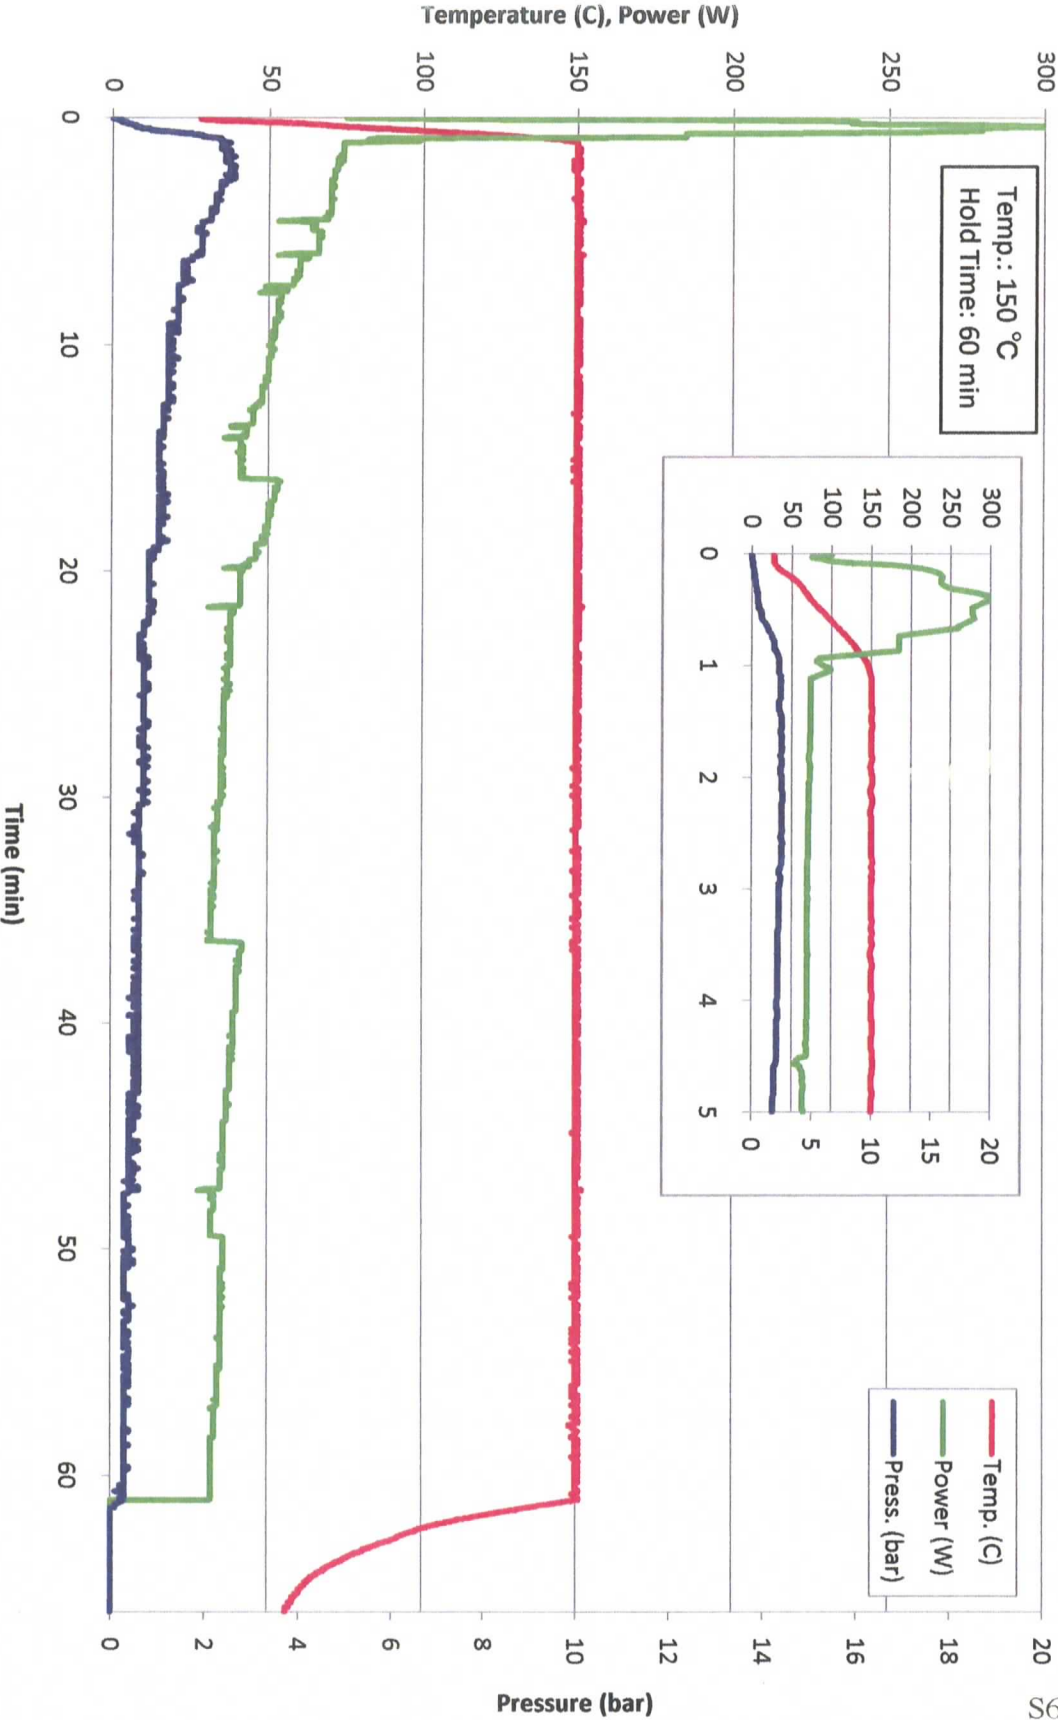



Temperature-Time Profile 4

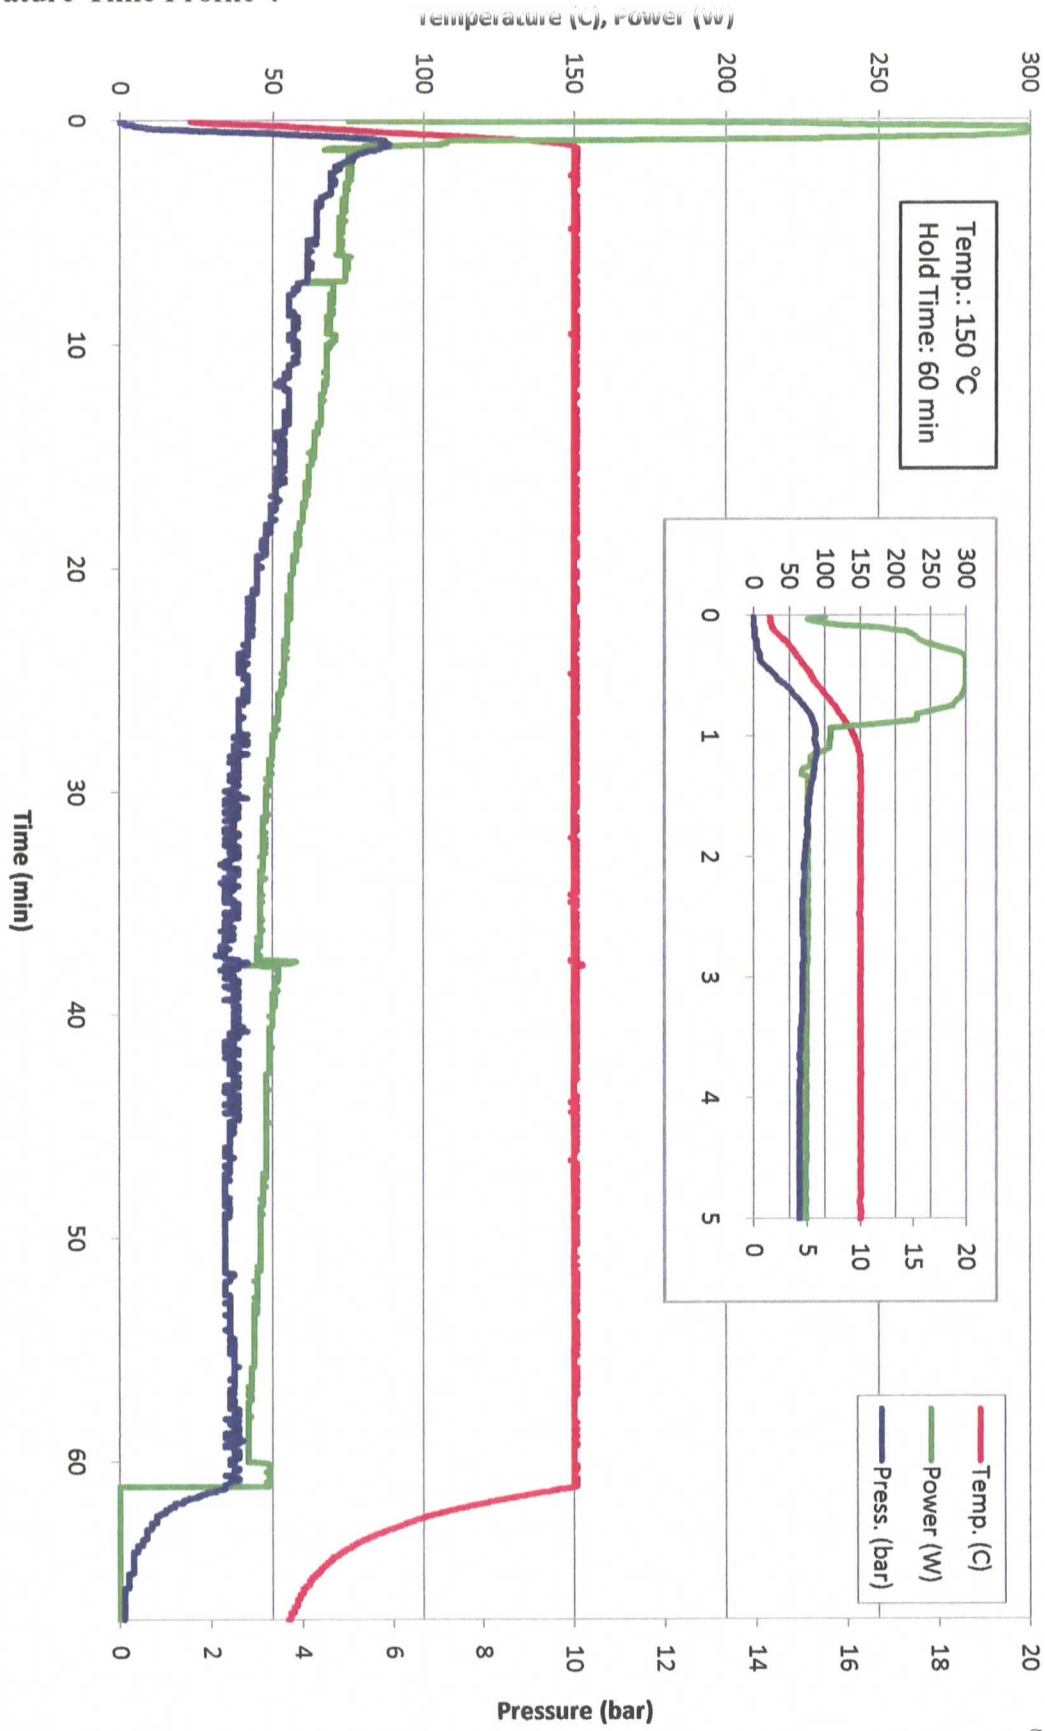

Temperature-Time Profile 5

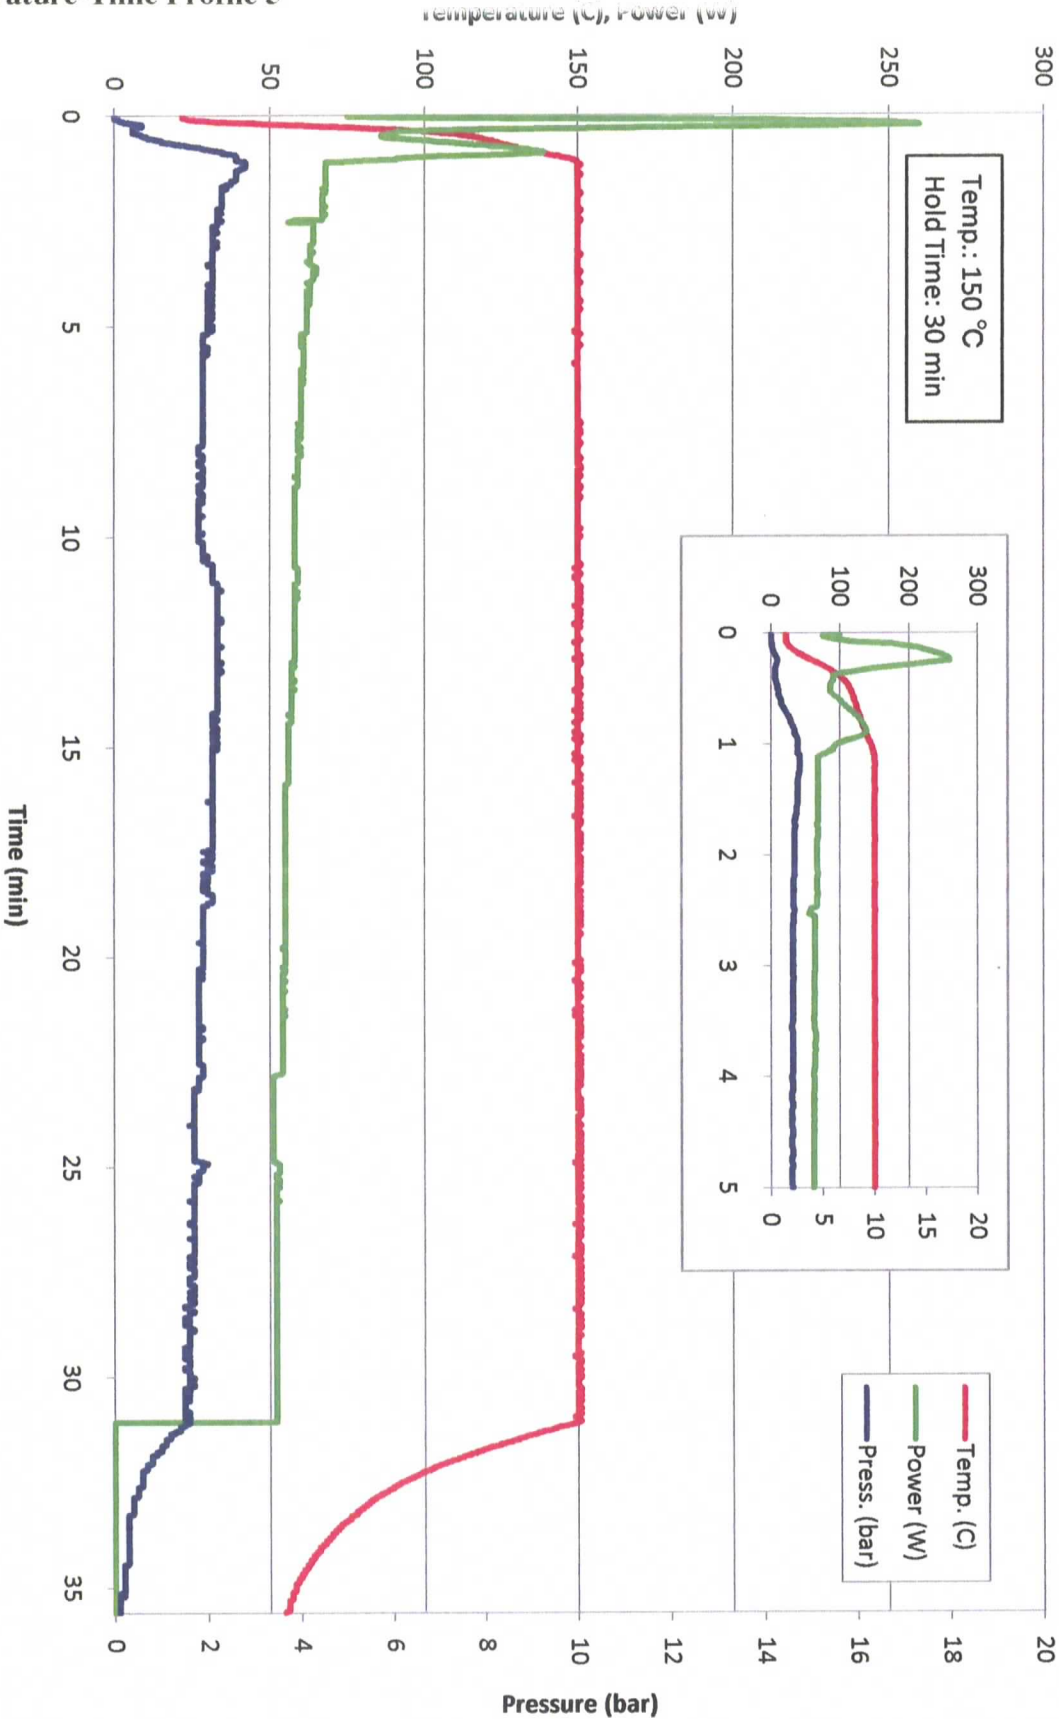

Temperature-Time Profile 6

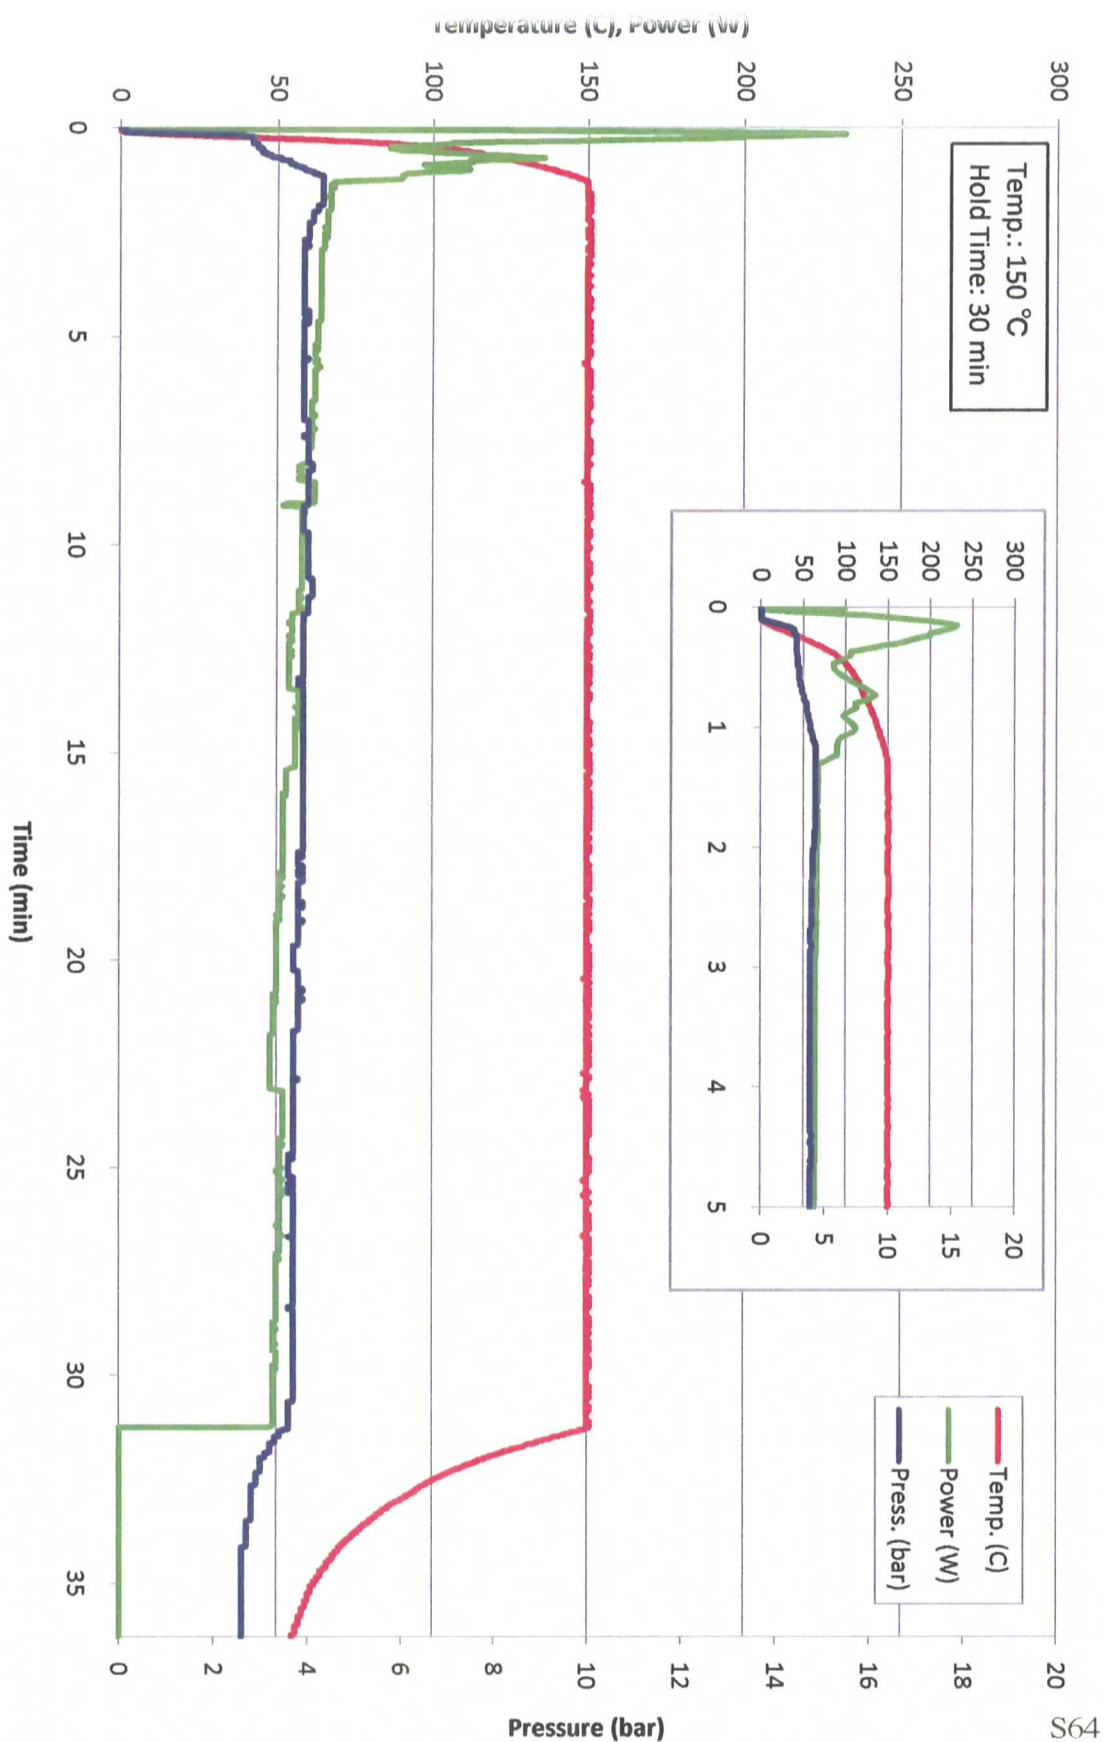

Temperature-Time Profile 7

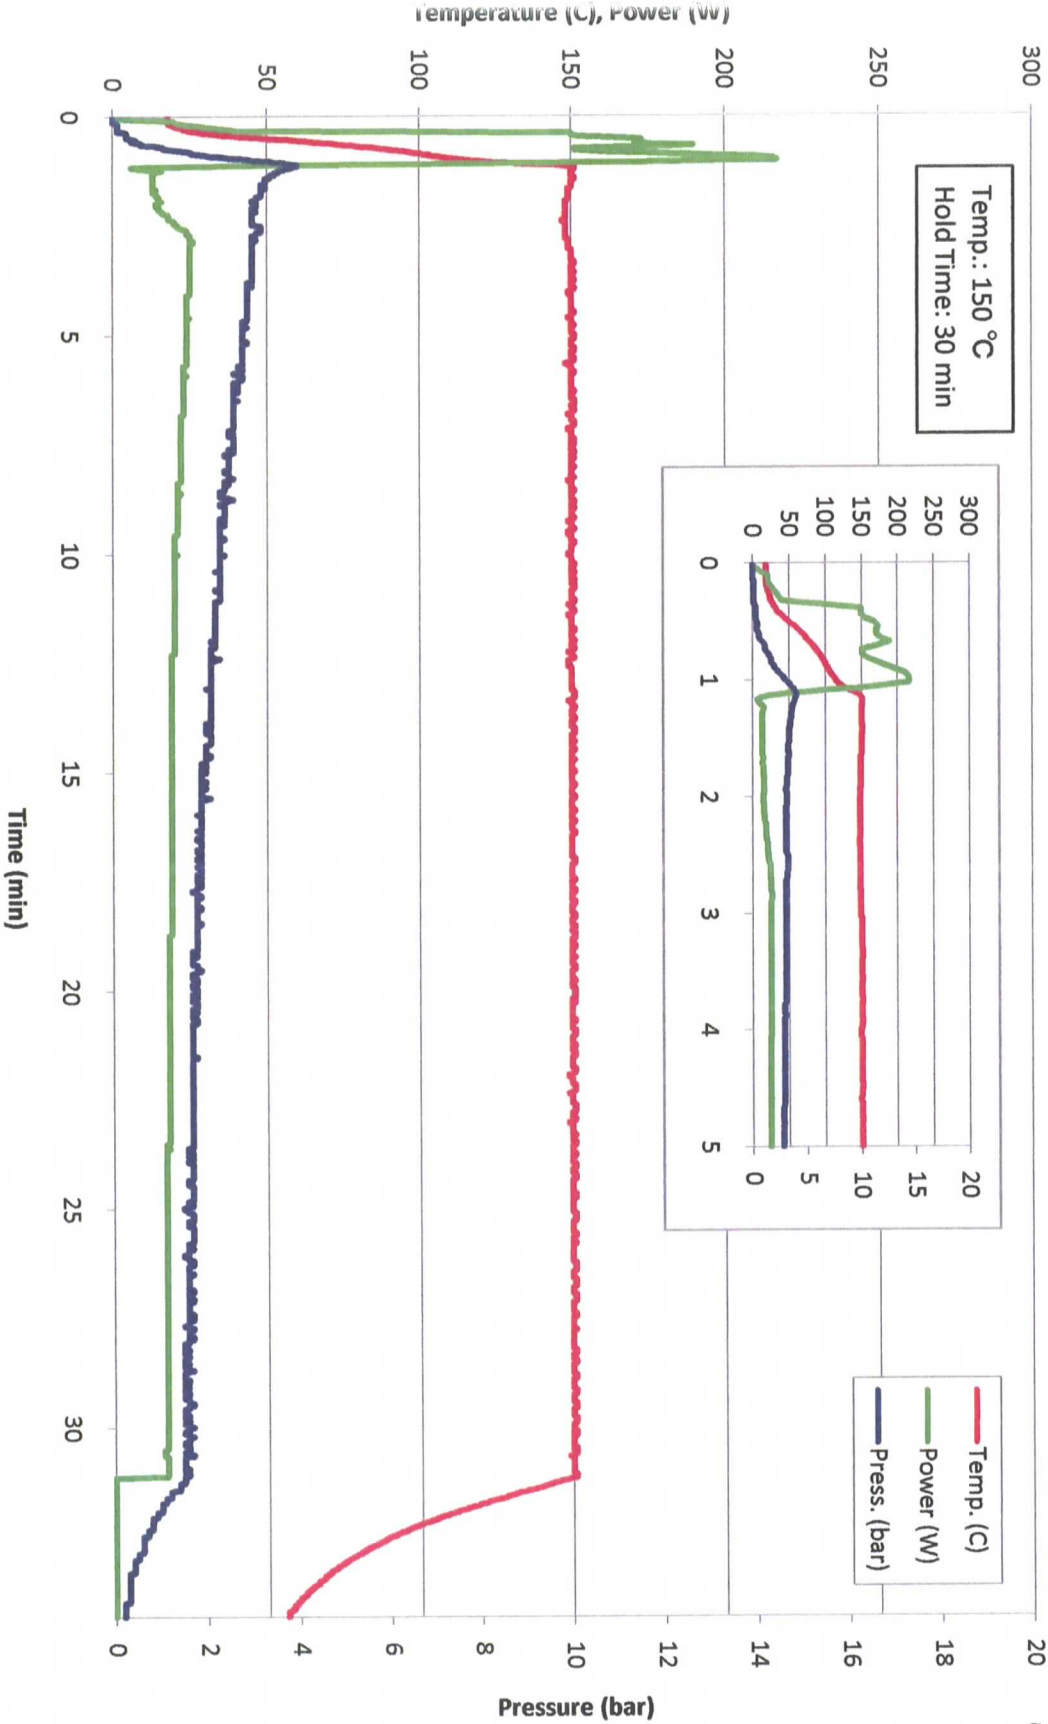

Supplement: Supplementary file 1 [file 4578814]
